# Supplementary material for: Comparison of mental health symptoms before and during the covid-19 pandemic: evidence from a systematic review and meta-analysis of 134 cohorts
Source: PubMed Central journal article supplement — BMJ. 2023 Mar 8;380:e074224. doi: 10.1136/bmj-2022-074224 (PMC9992728; doi:10.1136/bmj-2022-074224), 2023-03-08
Supplement: suny074224.ww.pdf [file suny074224.ww.pdf]

## **Supplementary Material: Table of Contents**

**Supplementary Material 1.** Amendments to Protocol

**Supplementary Material 2.** Search Strategies

**Supplementary Material 3.** Inclusion and Exclusion Coding Guides

**Supplementary Material 4.** Risk of Bias and Adequacy of Study Methods and Reporting Form

**Supplementary Material 5.** Detailed Results

**Supplementary Table 1.** Characteristics of Included Studies with References

**Supplementary Table 2.** Risk of Bias and Adequacy of Methods and Reporting

**Supplementary Table 3.** Individual Study Results for General Mental Health

**Supplementary Table 4.** Individual Study Results for Anxiety Symptoms

**Supplementary Table 5.** Individual Study Results for Depression Symptoms

**Supplementary Figures 1a to 1k.** Forest plots of standardized mean difference changes in general mental health for studies of the general population (1a), women or females (1b), men or males (1c), older adults (1d), young adults (1e) university students (1f), children and adolescents (1g), parents (1h), people with pre-existing medical conditions (1i), people with pre-

existing mental health conditions (1j), and sensitivity analysis of university students with results from Savage et al. from October 2020 instead of April 2020 (1k).

**Supplementary Figures 2a to 2l.** Forest plots of standardized mean difference changes in anxiety symptoms for studies of the general population (2a), women or females (2b), men or males (2c), older adults (2d), young adults (2e), university students (2f), children and adolescents (2g), people with pre-existing medical conditions (2h), people with pre-existing mental health conditions (2i), people who identify as sexual or gender minorities (2j), sensitivity analysis of people with pre-existing medical conditions conducted with results from Henry et al. from September to October 2020 instead of April 2020 (2k), and sensitivity analysis of people with pre-existing medical conditions conducted with results from Henry et al. from March 2021 instead of April 2020 (2l).

**Supplementary Figures 3a to 3m.** Forest plots of standardized mean difference changes in depression symptoms for studies of the general population (3a), women or females (3b), men or males (3c), older adults (3d), young adults (3e), university students (3f), children and adolescents (3g), parents (3h), people with pre-existing medical conditions (3i), people with pre-existing mental health conditions (3j), people who identify as sexual or gender minorities (3k), sensitivity analysis of people with pre-existing medical conditions conducted with results from Henry et al. from September to October 2020 instead of April 2020 (3l), and sensitivity analysis of people with pre-existing medical conditions conducted with results from Henry et al. from March 2021 instead of April 2020 (3m).

## **References of Included Studies**

## **Supplementary Material 1. Amendments to Protocol**

Our systematic review was rapidly designed and initiated in April 2020, and several amendments or clarifications were made. First, we changed from daily to weekly search updates on December 28, 2020 for more efficient reference processing. Second, on January 27, 2021, we made a minor change to the MEDLINE search strategy to incorporate the new Physical Distancing Medical Subject Heading created by the National Library of Medicine in light of the COVID-19 pandemic. Third, we made several amendments to Chinese-language search strategies to facilitate processing (see Supplementary Material 1). Fourth, we added a criterion to stipulate that eligible pre-COVID-19 assessments had to be completed between January 1, 2018 and December 31, 2019. We added this criterion because we had not anticipated that studies would report comparisons of outcomes during COVID-19 to outcomes assessed many years prior, which in some cases occurred during a different developmental life stage from assessments carried out during the pandemic.

## Supplementary Material 2: Search Strategies

### Ovid MEDLINE All

†New subject heading added to original search on January 27, 2021

1. Quarantine/
2. social isolation/ or loneliness/ or physical distancing/†
3. psychology.fs. or psychology/
4. Mental Health/
5. mental disorders/
6. social stigma/
7. Fear/
8. Anxiety/
9. Depression/
10. Stress, Physiological/ or Stress, Psychological/
11. Anger/
12. Irritable Mood/
13. Grief/
14. burnout, psychological/ or burnout, professional/
15. or/1-15
16. (Quarantine\* or Self-isolation or isolation or social distanc\* or shelter\*-in-place or psych\* or mental health or mental illness\* or mental disorder\* or stigma or fear\* or anxiety or anxious or depression or depressive or loneliness or stress\* or trauma\* or post-traumatic or posttraumatic or anger or mood\* or irritability or irritable or emotional disturbance\* or grief or burned out or burnout).tw,kf.
17. ((exp coronavirus/ or exp coronavirus infections/ or (betacoronavirus\* or beta coronavirus\* or coronavirus\* or corona virus\*).mp.) and (exp china/ or (china or chinese or hubei or wuhan).af.)) or (coronavirus\* or corona virus\* or betacoronavirus\* or beta coronavirus\*).mp.
18. (severe acute respiratory syndrome coronavirus 2 or "SARS CoV-2" or "SARSCoV 2" or SARSCoV2 or cov2 or "sars 2" or COVID or "coronavirus 2" or covid19 or nCov or ((new or Novel) adj3 coronavirus\*) or ncp).mp. or ((exp pneumonia/ or pneumonia.mp.) and wuhan.af.)
19. 17 or 18
20. 15 or 16
21. 19 and 20
22. ("20191231" or 2020\* or 2021\* or 2022\*).dt,ez,da.
23. 21 and 22

### Embase (Ovid)

1. exp coronavirinae/
2. exp Coronavirus infection/
3. (betacoronavirus\* or beta coronavirus\* or coronavirus\* or corona virus\*).mp.

4. 1 or 2 or 3
5. exp China/
6. (china or chinese or hubei or wuhan).af.
7. 5 or 6
8. 4 and 7
9. (betacoronavirus\* or beta coronavirus\* or coronavirus\* or corona virus\*).mp.
10. (severe acute respiratory syndrome coronavirus 2 or "SARS CoV-2" or "SARSCoV 2" or SARSCoV2 or cov2 or "sars 2" or COVID or "coronavirus 2" or covid19 or nCov or ((new or Novel) adj3 coronavirus\*) or ncp).mp.
11. (exp pneumonia/ or pneumonia.mp.) and wuhan.af.
12. 8 or 9 or 10 or 11
13. quarantine/
14. social isolation/ or isolation/ or patient isolation/
15. loneliness/
16. psychology/
17. mental health/
18. mental disease/
19. social stigma/
20. fear/
21. anxiety/
22. depression/
23. physiological stress/ or mental stress/
24. anger/
25. irritability/
26. exp grief/
27. exp burnout/
28. (mental disorder\* or Quarantine\* or Self-isolation or isolation or social distanc\* or shelter\*-in-place or psych\* or mental health or mental illness\* or stigma or fear\* or anxiety or anxious or depression or depressive or loneliness or stress\* or trauma\* or post-traumatic or posttraumatic or anger or mood\* or irritability or irritable or emotional disturbance\* or grief or burned out or burnout).tw,kw.
29. or/13-27
30. 12 and 29
31. ("20191231" or 2020\* or 2021\* or 2022\*).dc.
32. 30 and 31

### **PsycINFO (Ovid)**

1. (coronavirus\* or corona virus\* or betacoronavirus\* or beta coronavirus\*).mp.
2. (severe acute respiratory syndrome coronavirus 2 or "SARS CoV-2" or "SARSCoV 2" or SARSCoV2 or cov2 or "sars 2" or COVID or "coronavirus 2" or covid19 or nCov or ((new or Novel) adj3 coronavirus\*) or ncp).mp. or ((exp pneumonia/ or pneumonia.mp.) and wuhan.af.)
3. 1 or 2
4. ("20191231" or 2020\* or 2021\* or 2022\*).up.

5. 3 and 4

**CINAHL**

| Search ID# | Search Terms                                                                                                                                                                                                                                                                                                                                                                                                                                                                                                                                                                                                                                                                                                                                                                                                                                 |
|------------|----------------------------------------------------------------------------------------------------------------------------------------------------------------------------------------------------------------------------------------------------------------------------------------------------------------------------------------------------------------------------------------------------------------------------------------------------------------------------------------------------------------------------------------------------------------------------------------------------------------------------------------------------------------------------------------------------------------------------------------------------------------------------------------------------------------------------------------------|
| S26        | S11 AND S25                                                                                                                                                                                                                                                                                                                                                                                                                                                                                                                                                                                                                                                                                                                                                                                                                                  |
| S25        | S12 OR S13 OR S14 OR S15 OR S16 OR S17 OR S18 OR S19 OR S20 OR S21 OR S22 OR S23 OR S24                                                                                                                                                                                                                                                                                                                                                                                                                                                                                                                                                                                                                                                                                                                                                      |
| S24        | TI ( (mental disorder* or Quarantine* or Self-isolation or isolation or social distanc* or shelter*-in-place or psych* or mental health or mental illness* or stigma or fear* or anxiety or anxious or depression or depressive or loneliness or stress* or trauma* or post-traumatic or posttraumatic or anger or mood* or irritability or irritable or emotional disturbance* or grief or burned out or burnout) ) OR AB ( (mental disorder* or Quarantine* or Self-isolation or isolation or social distanc* or shelter*-in-place or psych* or mental health or mental illness* or stigma or fear* or anxiety or anxious or depression or depressive or loneliness or stress* or trauma* or post-traumatic or posttraumatic or anger or mood* or irritability or irritable or emotional disturbance* or grief or burned out or burnout) ) |
| S23        | (MH "Burnout, Professional")                                                                                                                                                                                                                                                                                                                                                                                                                                                                                                                                                                                                                                                                                                                                                                                                                 |
| S22        | (MH "Grief+")                                                                                                                                                                                                                                                                                                                                                                                                                                                                                                                                                                                                                                                                                                                                                                                                                                |
| S21        | (MH "Anger")                                                                                                                                                                                                                                                                                                                                                                                                                                                                                                                                                                                                                                                                                                                                                                                                                                 |
| S20        | (MH "Stress, Physiological") OR (MH "Stress, Psychological")                                                                                                                                                                                                                                                                                                                                                                                                                                                                                                                                                                                                                                                                                                                                                                                 |
| S19        | (MH "Depression")                                                                                                                                                                                                                                                                                                                                                                                                                                                                                                                                                                                                                                                                                                                                                                                                                            |
| S18        | (MH "Anxiety")                                                                                                                                                                                                                                                                                                                                                                                                                                                                                                                                                                                                                                                                                                                                                                                                                               |
| S17        | (MH "Fear")                                                                                                                                                                                                                                                                                                                                                                                                                                                                                                                                                                                                                                                                                                                                                                                                                                  |
| S16        | (MH "Stigma")                                                                                                                                                                                                                                                                                                                                                                                                                                                                                                                                                                                                                                                                                                                                                                                                                                |
| S15        | (MH "Mental Health") or (MH "Mental Disorders")                                                                                                                                                                                                                                                                                                                                                                                                                                                                                                                                                                                                                                                                                                                                                                                              |
| S14        | (MH "Psychology")                                                                                                                                                                                                                                                                                                                                                                                                                                                                                                                                                                                                                                                                                                                                                                                                                            |
| S13        | (MH "Social Isolation") OR (MH "Loneliness") or (MH "Social Distancing") or (MH "Stay at Home Orders") †                                                                                                                                                                                                                                                                                                                                                                                                                                                                                                                                                                                                                                                                                                                                     |
| S12        | (MH "Quarantine")                                                                                                                                                                                                                                                                                                                                                                                                                                                                                                                                                                                                                                                                                                                                                                                                                            |
| S11        | S7 OR S8 OR S9 OR S10                                                                                                                                                                                                                                                                                                                                                                                                                                                                                                                                                                                                                                                                                                                                                                                                                        |
| S10        | ( (MH "Pneumonia+") or TI (pneumonia) OR AB (pneumonia) ) AND ( TI (wuhan) OR AB (wuhan) OR AF (wuhan) )                                                                                                                                                                                                                                                                                                                                                                                                                                                                                                                                                                                                                                                                                                                                     |
| S9         | TI ( (severe acute respiratory syndrome coronavirus 2 or "SARS CoV-2" or "SARSCoV 2" or SARSCoV2 or cov2 or "sars 2" or COVID or "coronavirus 2" or covid19 or nCov or ((new or Novel) N3 coronavirus*) ) OR AB ( (severe acute respiratory syndrome coronavirus 2 or "SARS CoV-2" or "SARSCoV 2" or                                                                                                                                                                                                                                                                                                                                                                                                                                                                                                                                         |

|    |                                                                                                                                                                                          |
|----|------------------------------------------------------------------------------------------------------------------------------------------------------------------------------------------|
|    | SARSCoV2 or cov2 or "sars 2" or COVID or "coronavirus 2" or covid19 or nCov or ((new or Novel) N3 coronavirus* ) or (MH "Covid 19") †                                                    |
| S8 | TI ( (betacoronavirus* or beta coronavirus* or coronavirus* or corona virus*) ) OR AB ( (betacoronavirus* or beta coronavirus* or coronavirus* or corona virus*))                        |
| S7 | S5 AND S6                                                                                                                                                                                |
| S6 | S1 OR S2                                                                                                                                                                                 |
| S5 | S3 OR S4                                                                                                                                                                                 |
| S4 | TI ( (china or chinese or hubei or wuhan) ) OR AB ( (china or chinese or hubei or wuhan) ) OR AF ( (china or chinese or hubei or wuhan) ) OR SO ( (china or chinese or hubei or wuhan) ) |
| S3 | (MH "China+")                                                                                                                                                                            |
| S2 | TI ( (betacoronavirus* or beta coronavirus* or coronavirus* or corona virus*) ) OR AB ( (betacoronavirus* or beta coronavirus* or coronavirus* or corona virus*) )                       |
| S1 | (MH "Coronavirus+") OR (MH "Coronavirus Infections+")                                                                                                                                    |

### **Web of Science**

TOPIC: (Quarantine\* or "Self-isolation" or isolation or "social distanc\*" or "shelter\*-in-place" or psych\* or "mental health" or "mental illness\*" or "mental disorder\*" or stigma or fear\* or anxiety or anxious or depression or depressive or loneliness or stress\* or trauma\* or "post-traumatic" or posttraumatic or anger or mood\* or irritability or irritable or "emotional disturbance\*" or grief or "burned out" or burnout) AND TOPIC: ((coronavirus\* or "corona virus\*" or betacoronavirus\* or "beta coronavirus\*" or "severe acute respiratory syndrome coronavirus 2" or "SARS CoV-2" or "SARSCoV 2" or SARSCoV2 or cov2 or "sars 2" or COVID or "coronavirus 2" or covid19 or nCov or "Novel coronavirus\*" or "new coronavirus\*"))

Indexes=SCI-EXPANDED, SSCI, A&HCI, CPCI-S, CPCI-SSH, BKCI-S, BKCI-SSH, ESCI, CCR-EXPANDED, IC Timespan=Year to date

### **China National Knowledge Infrastructure**

Restricted to disciplines: Medical and Public Health & Social science

TI=(隔离+封城+社交距离+方舱+心理+心理健康+精神卫生+精神疾病+心理疾病+污名+耻辱+羞辱+恐惧+焦虑+抑郁+孤独+压力+应激+创伤+创伤后+愤怒+情绪+心情+易怒+情绪障碍+心理障碍+哀伤+悲伤+悲痛+悲哀+忧郁+倦怠)\*(新冠+新型冠状病毒) OR AB=(隔离+封城+社交距离+方舱+心理+心理健康+精神卫生+精神疾病+心理疾病+污名+耻辱+羞辱+恐惧+焦虑+抑郁+孤独+压力+应激+创伤+创伤后+愤怒+情绪+心情+易怒+情绪障碍+心理障碍+哀伤+悲伤+悲痛+悲哀+忧郁+倦怠)\*(新冠+新型冠状病毒)

### **Wanfang**

题名:("隔离"+封城+"社交距离"+方舱+心理+"心理健康"+"精神卫生"+"精神疾病"+"心理疾病"+污名+耻辱+羞辱+恐惧+焦虑+抑郁+孤独+压力+应激+创伤+"创伤后"+愤怒+情绪+心情+易怒+"情绪障碍"+"心理障碍"+哀伤+悲伤+悲痛+悲哀+忧郁+倦怠)\*("新冠"+"新型冠状病毒")+摘要:("隔离"+封城+"社交距离"+方舱+心理+"心理健康"+"精神卫生"+"精神疾病"+"心理疾病"+污名+耻辱+羞辱+恐惧+焦

虑+抑郁+孤独+压力+应激+创伤+"创伤后"+愤怒+情绪+心情+易怒+"情绪障碍"+"心理障碍"+哀伤+悲伤+悲痛+悲哀+忧郁+倦怠)\*("新冠"+"新型冠状病毒")

We made several amendments to the original search strategies. Since the Wanfang database cannot export more than 5000 references at once, we broke the search strategies into two or more smaller search strings to get all the references. The four changes on September 1, 2020, September 28, 2020, October 15, 2020 and October 18, 2020 are all for this purpose.

To make this process more efficient, the disciplines of the China National Knowledge Infrastructure database were restricted to Medical and Public Health AND Social science subgroup 2 and those of Wanfang database were restricted to Medicine and Health AND Culture, Science, Education and PE disciplines on October 23, 2020.

September 1, 2020

### **Wanfang**

题名:("隔离"+封城+"社交距离"+方舱+心理+"心理健康"+"精神卫生"+"精神疾病"+"心理疾病"+污名+耻辱+羞辱+恐惧+焦虑)\*("新冠"+"新型冠状病毒")+摘要:("隔离"+封城+"社交距离"+方舱+心理+"心理健康"+"精神卫生"+"精神疾病"+"心理疾病"+污名+耻辱+羞辱+恐惧+焦虑)\*("新冠"+"新型冠状病毒")

题名:("隔离"+封城+"社交距离"+方舱+抑郁+孤独+压力+应激+创伤+"创伤后"+愤怒+情绪+心情+易怒+"情绪障碍"+"心理障碍"+哀伤+悲伤+悲痛+悲哀+忧郁+倦怠)\*("新冠"+"新型冠状病毒")+摘要:("隔离"+封城+"社交距离"+方舱+抑郁+孤独+压力+应激+创伤+"创伤后"+愤怒+情绪+心情+易怒+"情绪障碍"+"心理障碍"+哀伤+悲伤+悲痛+悲哀+忧郁+倦怠)\*("新冠"+"新型冠状病毒")

September 28, 2020

### **Wanfang**

题名:("隔离"+封城+"社交距离"+方舱+心理+"心理健康"+"精神卫生"+"精神疾病"+"心理疾病"+污名+耻辱+羞辱+恐惧+焦虑)\*("新冠"+"新型冠状病毒")+摘要:("隔离"+封城+"社交距离"+方舱+心理+"心理健康"+"精神卫生"+"精神疾病"+"心理疾病"+污名+耻辱+羞辱+恐惧+焦虑)\*("新冠"+"新型冠状病毒")

题名:("隔离"+封城+"社交距离"+方舱+抑郁+孤独+压力+应激+创伤+"创伤后")\*("新冠"+"新型冠状病毒")+摘要:("隔离"+封城+"社交距离"+方舱+抑郁+孤独+压力+应激+创伤+"创伤后")\*("新冠"+"新型冠状病毒")

题名:("隔离"+封城+"社交距离"+方舱+愤怒+情绪+心情+易怒+"情绪障碍"+"心理障碍"+哀伤+悲伤+悲痛+悲哀+忧郁+倦怠)\*("新冠"+"新型冠状病毒")+摘要:("隔离"+封城+"社交距离"+方舱+愤怒+情绪+心情+易怒+"情绪障碍"+"心理障碍"+哀伤+悲伤+悲痛+悲哀+忧郁+倦怠)\*("新冠"+"新型冠状病毒")

October 15, 2020

### **Wanfang**

题名:("隔离"+封城+"社交距离"+方舱+心理+"心理健康"+"精神卫生"+"精神疾病"+"心理疾病")\*("新冠"+"新型冠状病毒")+摘要:("隔离"+封城+"社交距离"+方舱+心理+"心理健康"+"精神卫生"+"精神疾病"+"心理疾病")\*("新冠"+"新型冠状病毒")

题名:("隔离"+封城+"社交距离"+方舱+污名+耻辱+羞辱+恐惧+焦虑+抑郁+孤独+压力)\*("新冠"+"新型冠状病毒")+摘要:("隔离"+封城+"社交距离"+方舱+污名+耻辱+羞辱+恐惧+焦虑+抑郁+孤独+压力)\*("新冠"+"新型冠状病毒")

题名:("隔离"+封城+"社交距离"+方舱+应激+创伤+"创伤后"+愤怒+情绪+心情+易怒+"情绪障碍"+"心理障碍"+哀伤+悲伤+悲痛+悲哀+忧郁+倦怠)\*("新冠"+"新型冠状")+摘要:("隔离"+封城+"社交距离"+方舱+应激+创伤+"创伤后"+愤怒+情绪+心情+易怒+"情绪障碍"+"心理障碍"+哀伤+悲伤+悲痛+悲哀+忧郁+倦怠)\*("新冠"+"新型冠状")

October 18, 2020

### Wanfang

题名:("隔离"+封城+"社交距离"+方舱+心理+"心理健康"+"精神卫生"+"精神疾病"+"心理疾病")\*("新冠"+"新型冠状")+摘要:("隔离"+封城+"社交距离"+方舱+心理+"心理健康"+"精神卫生"+"精神疾病"+"心理疾病")\*("新冠"+"新型冠状")

题名:("隔离"+封城+"社交距离"+方舱+污名+耻辱+羞辱+恐惧+焦虑+抑郁)\*("新冠"+"新型冠状")+摘要:("隔离"+封城+"社交距离"+方舱+污名+耻辱+羞辱+恐惧+焦虑+抑郁)\*("新冠"+"新型冠状")

题名:("隔离"+封城+"社交距离"+方舱+孤独+压力)\*("新冠"+"新型冠状")+摘要:("隔离"+封城+"社交距离"+方舱+孤独+压力)\*("新冠"+"新型冠状")

题名:("隔离"+封城+"社交距离"+方舱+应激+创伤+"创伤后"+愤怒+情绪+心情+易怒+"情绪障碍"+"心理障碍"+哀伤+悲伤+悲痛+悲哀+忧郁+倦怠)\*("新冠"+"新型冠状")+摘要:("隔离"+封城+"社交距离"+方舱+应激+创伤+"创伤后"+愤怒+情绪+心情+易怒+"情绪障碍"+"心理障碍"+哀伤+悲伤+悲痛+悲哀+忧郁+倦怠)\*("新冠"+"新型冠状")

October 23, 2020

### China National Knowledge Infrastructure

Restricted to disciplines: Medical and Public Health & Social science subgroup 2

TI=(隔离+封城+社交距离+方舱+心理+心理健康+精神卫生+精神疾病+心理疾病+污名+耻辱+羞辱+恐惧+焦虑+抑郁+孤独+压力+应激+创伤+创伤后+愤怒+情绪+心情+易怒+情绪障碍+心理障碍+哀伤+悲伤+悲痛+悲哀+忧郁+倦怠)\*("新冠+新型冠状) OR AB=(隔离+封城+社交距离+方舱+心理+心理健康+精神卫生+精神疾病+心理疾病+污名+耻辱+羞辱+恐惧+焦虑+抑郁+孤独+压力+应激+创伤+创伤后+愤怒+情绪+心情+易怒+情绪障碍+心理障碍+哀伤+悲伤+悲痛+悲哀+忧郁+倦怠)\*("新冠+新型冠状")

### Wanfang

Restricted to disciplines: Medicine and Health & Culture, Science, Education and PE

题名:("隔离" or 封城 or "社交距离" or 方舱 or 心理 or "心理健康" or "精神卫生" or "精神疾病" or "心理疾病" or 污名 or 耻辱 or 羞辱 or 恐惧 or 焦虑 or 抑郁 or 孤独 or 压力 or 应激 or 创伤 or "创伤后" or 愤怒 or 情绪 or 心情 or 易怒 or "情绪障碍" or "心理障碍" or 哀伤 or 悲伤 or 悲痛 or 悲哀 or 忧郁 or 倦怠) and ("新冠" or "新型冠状") or 摘要:("隔离" or 封城 or "社交距离" or 方舱 or 心理 or "心理健康" or "精神卫生" or "精神疾病" or "心理疾病" or 污名 or 耻辱 or 羞辱 or 恐惧 or 焦虑 or 抑郁 or 孤独 or 压力 or 应激 or 创伤 or "创伤后" or 愤怒 or 情绪 or 心情 or 易怒 or "情绪障碍" or "心理障碍" or 哀伤 or 悲伤 or 悲痛 or 悲哀 or 忧郁 or 倦怠) and ("新冠" or "新型冠状")

### MedRxiv (pre-prints)

Search 1: (isolation OR "mental health" OR "mental illness" OR "mental disorder") AND (COVID OR covid19)

Search 2: (psychology OR psychological OR psychosocial OR anxiety OR depression OR stress or trauma) AND (COVID OR covid19)

**Open Science Framework (pre-prints)**

(isolation OR psychology OR psychological OR psychosocial OR “mental health” OR “mental illness” OR “mental disorder” OR anxiety OR depression OR stress or trauma) AND (coronavirus OR COVID OR covid19)

## **Supplementary Material 3: Inclusion and Exclusion Coding Guides for Main Changes Review Plus Additional Criteria for Present Report**

### Title and Abstract Review:

**Exclude: not original human data or a case study or case series.** If it is clear from the title and abstract that the article is not an original report of primary data, but, for example, a letter, editorial, systematic review or meta-analysis, or it is a single case study or case series, then it is excluded. Studies reporting only on animal, cellular, or genetic data are also excluded. Conference abstracts are included.

**Exclude: not a study of any population affected by the COVID-19 outbreak.** If it is clear from the title or abstract that the study is not about any population affected by the COVID-19 outbreak, it is excluded. Studies that include fewer than 100 participants, are excluded. If a longitudinal study has baseline sample size with at least 100 participants, but no follow-up with at least 100 participants, then we exclude the study (and document); if its baseline and at least one follow-up have more than 100 participants, we include the study.

**Exclude: not a study which reports mental health symptom changes longitudinally pre-COVID-19 to COVID-19 or during COVID-19.** If it is clear from the title or abstract that the study does not report proportions of participants meeting diagnostic criteria using a validated diagnostic interview or validated mental health scale, or proportions of symptoms (based on a threshold or measured continuously) prior to and after the start of COVID-19, or longitudinally during COVID-19, then it will be excluded.

For pre-COVID versus during-COVID studies, pre- and during- samples must include the same cohort, not different representative samples. Pre- and during-samples should have less than 10% difference in the participants in the sample\* or should statistically account for missing data, i.e., if N between the samples differs by more than 10%, modelling or imputation is needed to evaluate results for all participants. Pre-COVID data needs to be collected prior to 2020 (or at least 80% of the participants' data need be collected prior to 2020 if collection spans from 2019 to 2020) and after 2018(or at least 80% of the participants' data need to be collected after 2018 if collection spans from pre-2018 to 2018).

For studies with multiple waves across COVID, if there are pre-pandemic time points, the most recent pre-pandemic wave needs to be in 2018 or later; if the most recent pre-pandemic wave spans from pre-2018 to 2018, at least 80% of the data need to be collected in 2018. Studies with multiple waves across COVID-19 must have at least two time points that have less than 10% difference in the participants in the sample\*, or should statistically account for missing data, regardless of whether or not the study has pre-COVID assessments. If outcomes from the study are only shown graphically without eligible numerical values, exclude the study. At least 90% of participants in assessments from two time points need to be the same participants. In a three-wave survey, if  $N-T1 = 1000$ ,  $N - T2 = 500$ , and  $N - T3 = 500$ , T2 and T3 would only be eligible if at least 90% of the participants at each time point were the same. It is not enough to just have a total N within 10%.

**Include: study eligible to be included in full-text review.**

### Full-text Review:

**Exclude: not original human data or a case study or case series.** If the article is not an

original report of primary data, but, for example, a letter, editorial, systematic review or meta-analysis, or it is a single case study or case series, then it is excluded. Studies reporting only on animal, cellular, or genetic data are also excluded. Conference abstracts are included.

**Exclude: not a study of any population affected by the COVID-19 outbreak.** If it is clear from the full text that the study is not about any population affected by the COVID-19 outbreak, it is excluded. Studies that include fewer than 100 participants, are excluded. If a longitudinal study has baseline sample size with at least 100 participants, but no follow-up with at least 100 participants, then we exclude the study (and document); if its baseline and at least one follow-up have more than 100 participants, we include the study.

**Exclude: not a study which reports mental health symptom changes longitudinally pre-COVID-19 to COVID-19 or during COVID-19.** If it is clear from the title or abstract that the study does not report continuous scores of symptom levels or proportions of participants meeting the threshold on a validated scale, or diagnostic criteria using a validated diagnostic interview prior to and after the start of COVID-19, or longitudinally during COVID-19, then it will be excluded.

For pre-COVID versus during-COVID studies, pre- and during- samples must include the same cohort, not different representative samples. Pre- and during-samples should have less than 10% difference in the participants in the sample\* or should statistically account for missing data, i.e., if N between the samples differs by more than 10%, modelling or imputation is needed to evaluate results for all participants. Pre-COVID data needs to be collected prior to 2020 (or at least 80% of the participants' data need be collected prior to 2020 if collection spans from 2019 to 2020) and after 2018 (or at least 80% of the participants' data need to be collected after 2018 if collection spans from pre-2018 to 2018).

For studies with multiple waves across COVID, if there are pre-pandemic time points, the most recent pre-pandemic wave needs to be in 2018 or later; if the most recent pre-pandemic wave spans from pre-2018 to 2018, at least 80% of the data need to be collected in 2018. Studies with multiple waves across COVID-19 must have at least two time points that have less than 10% difference in the participants in the sample, or should statistically account for missing data, regardless of whether or not the study has pre-COVID assessments. If outcomes from the study are only shown graphically without eligible numerical values, exclude the study

**Include: study eligible for inclusion in systematic review.**

**Additional Criterion for Present Report:** (1) Eligible pre-COVID-19 assessments had to be done between January 1, 2018 and December 31, 2019; (2) Only studies that compared pre-COVID-19 and COVID-19 assessments were included but not studies with longitudinal data only during COVID-19.

## **Supplementary Material 4: Risk of Bias and Adequacy of Study Methods and Reporting**

### **Form**

#### **Q1. Was the sample frame appropriate to address the target population?**

**Yes:** The sampling frame was a true or close representation of the target population.

**No:** The sampling frame was NOT a true or close representation of the target population.

**Unclear:** Not enough information provided to determine.

#### **Q2. Were study participants recruited in an appropriate way?**

**Yes:** A census was undertaken, OR, some form of random selection was used to select the sample (e.g. simple random sampling, stratified random sampling, cluster sampling, systematic sampling).

**No:** A census was NOT undertaken, AND some form of random selection was NOT used to select the sample.

**Unclear:** Not enough information provided to determine.

#### **Q3. Was the sample size adequate?**

**Yes:** There is evidence that the authors conducted a sample size calculation to determine an adequate sample size OR the study was large enough (e.g., a large national survey) whereby a sample size calculation is not required. In these cases, sample size can be considered adequate. If at least 200 participants are included for continuous outcomes and 250 for proportions, this is considered low risk.

**No:** The authors did not reach their intended sample size, or no sample size calculation is provided and there are < 100 participants for continuous outcomes, or < 125 for proportions.

**Unclear:** No sample size calculation is provided, and between 100-199 participants are included for continuous outcomes or between 125-249 for proportions.

#### **Q4. Were the study participants and setting described in detail?**

**Yes:** Data included age, sex, and at least 1 socioeconomic indicator (e.g., income, education, work status).

**No:** The minimum sociodemographic variables have not been reported.

**Unclear:** Not stated

#### **Q5. Was the response rate adequate and was the data analysis conducted with sufficient coverage?**

**Yes:** The overall response rate or response rate for intended subgroups was  $\geq 75\%$ , OR, an analysis was performed that established that there was not a substantive difference in relevant demographic characteristics between responders and non-responders within a subgroup (if non-response too high (e.g.,  $> 50\%$ ), code "No")

**No:** The overall response rate or response rate for subgroups was  $< 75\%$ , and if any analysis comparing responders and non-responders was done, it showed a meaningful difference in relevant demographic characteristics between responders and non-responders.

**Unclear:** Not enough information provided to determine.

#### **Q6. Were valid methods used for the identification of the outcome variable?**

**Yes:** The study instrument had been shown to have reliability and validity, e.g., test-retest, piloting, validation in a previous study, etc.

**No:** The study instrument had NOT been shown to have reliability or validity.

**Unclear:** Not stated.

**Q7. Was the mental health outcome measured in a standard, reliable way for all participants?**

**Yes:** All self-report data were collected directly from the participants. Any clinical interview data includes at least information about the interviewers' level of education or training received. The same mode of data collection was used for all participants. All aspects of this question must be present (where relevant).

**No:** In some instances, data were collected from a proxy (e.g., a spouse). The qualifications of clinical interviewers are not reported or not appropriate. The same mode of data collection was NOT used for all participants. If any aspects of this item are absent, it is high risk.

**Unclear:** Not stated.

**Q8. Was there appropriate statistical analysis?**

**Yes:** Continuous variables report (1) mean (SD) of change or (2) pre mean (SD) and post mean (SD) with/out correlation between pre and post scores. For dichotomous variables, numerator, denominator, and percentages are clearly reported. Continuous variables are not artificially dichotomized. The statistical analyses section is detailed enough for readers to understand change scores (see STROBE reporting guidelines, if necessary).

**No:** Continuous variables do not include a report of the (1) mean (SD) of change or (2) pre mean (SD) and post mean (SD) with/out correlation between pre and post scores. For dichotomous variables, the numerator, denominator, or percentages are not clearly reported. The statistical analyses section does not clearly describe the methods used to assess change scores.

**Q9. Was the follow-up rate adequate, and if not, was the low follow-up rate managed appropriately?**

**Yes:** At least 75% of those who participated in the pre-COVID-19 assessment(s) provided follow-up responses and had their responses included in the follow-up, OR, an analysis was performed that showed no substantive difference in relevant demographic characteristics between participants who stayed in the study and drop-outs (if dropout too high (e.g. > 50%), code "No").

**No:** Less than 75% of those participated in the pre-COVID-19 assessment(s) provided responses and had their responses included in the follow-up, and if any analysis comparing participants who stayed in the study and drop-outs was done, it showed a substantive difference in relevant demographic characteristics between the two groups.

**Unclear:** Not stated.

## Supplementary Material 5. Detailed Results

### Search Results and Selection of Eligible Studies

As of April 11, 2022, we identified 94,411 unique citations. We excluded 92,457 after title and abstract review and 1,523 after full-text review, leaving 431 studies with longitudinal data. Of those, 276 studies assessed outcomes longitudinally only during the pandemic period, 11 only assessed outcomes (e.g., loneliness) not included in the present report, 1 used the same outcome measure but for different time periods pre-COVID-19 (worst month in last year) and COVID-19 (last month), and 6 reported data from the same dataset as another study, leaving 137 unique studies with data from 134 cohorts (Figure 1).

### Characteristics of Included Studies

Supplementary Table 1 shows characteristics of included studies.<sup>S1-S137</sup> All cohorts reported COVID-19 outcome data collected in 2020, including 4 studies that reported a single data collection period that bridged 2020 and 2021.<sup>S74,S96,S114,S128</sup> All studies reported data from March 2020 or later except for 7 studies from China,<sup>S5,S52,S54,S79,S99,S121,S133</sup> 1 study from Japan,<sup>S82</sup> and 1 study from Taiwan<sup>S130</sup> that reported data from January or February 2020. Large national probability-based cohorts from the United Kingdom<sup>S11,S12</sup> and the Netherlands<sup>S16,S17</sup> and a cohort of people with a pre-existing medical condition (systemic sclerosis)<sup>S118</sup> reported data collected at multiple time points during 2020. The systemic sclerosis study also reported data collected at 3 time points in 2021,<sup>S118</sup> but no other studies reported 2021 outcomes for all participants. Of the 137 included studies, 105 (77%) were from high-income (New Zealand = 2<sup>S1,S119</sup>; Italy = 4<sup>S2,S30,S88,S126</sup>; United States = 24<sup>S4,S6,S18,S29,S40,S48,S50,S59-S61,S71,S77,S92,S102,S103,S108,S109,S111,S112,S114,S120,S122,S131,S135</sup>; Finland = 1<sup>S9</sup>; Spain = 5<sup>S10,S27,S76,S81,S116</sup>; United Kingdom = 13<sup>S11,S12,S21,S28,S39,S42,S47,S63,S64,S83,S84,S98,S132</sup>; Japan = 9<sup>S13,S24,S41,S65,S73,S82,S115,S127,S128</sup>; Denmark = 2<sup>S15,S22</sup>; the Netherlands = 9<sup>S16,S17,S32,S33,S53,S72,S75,S110,S113</sup>; Australia = 5<sup>S19,S37,S87,S125,S134</sup>; Ireland = 1<sup>S20</sup>; Chile = 1<sup>S23</sup>; Sweden

= 2<sup>S25,S96</sup>; Singapore = 3<sup>S26,S31,S36</sup>; Hong Kong, China = 2<sup>S3,S35</sup>; Switzerland = 2<sup>S38,S46</sup>; Canada = 4<sup>S43,S51,S104,S136</sup>; Portugal = 2<sup>S44,S89</sup>; Lithuania = 2<sup>S49,S80</sup>; Germany = 5<sup>S67,S90,S91,S93,S124</sup>; Israel = 1<sup>S94</sup>; Taiwan = 1<sup>S130</sup>; France = 1<sup>S137</sup>; multiple countries = 4<sup>S8,S66,S118,S123</sup>), 28 (20%) from upper-middle-income (China = 23<sup>S5,S34,S45,S52,S54-S58,S68-S70,S78,S79,S85,S86,S95,S97,S99-S101,S121,S133</sup>; Turkey = 2<sup>S7,S117</sup>; Brazil = 2<sup>S74,S105</sup>; Mexico = 1<sup>S107</sup>), 1 (1%) from mixed high-income and upper-middle-income (Italy and Paraguay)<sup>S129</sup>, 3 (2%) from lower-middle-income (Iran = 1<sup>S14</sup>; India = 1<sup>S62</sup>; Bangladesh = 1<sup>S106</sup>), and none from low-income countries. By region, there were 52 studies from Europe and Central Asia,<sup>S2,S7,S9-S12,S15-S17,S20-S22,S25,S27,S28,S30,S32,S33,S38,S39,S42,S44,S46,S47,S49,S53,S63,S64,S66,S67,S72,S75,S76,S80,S81,S83,S84,S88-S91,S93,S96,S98,S110,S113,S116,S117,S124,S126,S132,S137</sup> 46 from East Asia and the Pacific,<sup>S1,S3,S5,S13,S19,S24,S26,S31,S34-S37,S41,S45,S52,S54-S58,S65,S68-S70,S73,S78,S79,S82,S85-S87,S95,S97,S99-S101,S115,S119,S121,S123,S125,S127,S128,S130,S133,S134</sup> 28 from North America,<sup>S4,S6,S18,S29,S40,S43,S48,S50,S51,S59-S61,S71,S77,S92,S102-S104,S108,S109,S111,S112,S114,S120,S122,S131,S135,S136</sup> 4 from Latin America and the Caribbean,<sup>S23,S74,S105,S107</sup> 2 from Middle East and North Africa,<sup>S14,S94</sup> 2 from South Asia,<sup>S62,S106</sup> 2 from mixed Europe and North American samples,<sup>S8,S118</sup> 1 from a mixed Europe and Latin America and the Caribbean sample,<sup>S129</sup> and none from Sub-Saharan Africa.

There were 18 studies<sup>S1-S18</sup> that reported on 16 different adult general population cohorts, including large national probability-based samples from the United Kingdom (N = 10,918 to 15,376),<sup>S11,S12</sup> Denmark (N = 4,234),<sup>S15</sup> and the Netherlands (N = 3,983 to 4,064)<sup>S16,S17</sup> and 13 non-probabilistic convenience samples with 102 to 3,124 participants from New Zealand,<sup>S1</sup> Italy,<sup>S2</sup> China,<sup>S3,S5</sup> the United States,<sup>S4,S6,S18</sup> Turkey,<sup>S7</sup> Finland,<sup>S9</sup> Spain,<sup>S10</sup> Japan,<sup>S13</sup> Iran,<sup>S14</sup> and from multiple countries via an online crowdsourcing platform.<sup>S8</sup>

There were 18 studies with data on older adults,<sup>S19-S36</sup> including one (N = 1,679)<sup>S33</sup> that reported subgroup data from the large Dutch national probability sample,<sup>S16,S17</sup> and other samples of at least 1,000 participants from Australia (N = 1,671),<sup>S19</sup> Ireland (N = 3,490),<sup>S20</sup> the United Kingdom (N = 3,281),<sup>S21</sup> Sweden (N = 1,071),<sup>S25</sup> the Netherlands (N = 1,068),<sup>S32</sup> and

China (N = 2,745).<sup>S34</sup> Eleven other studies from Denmark,<sup>S22</sup> Chile,<sup>S23</sup> Japan,<sup>S24</sup> Singapore,<sup>S26,S31,S36</sup> Spain,<sup>S27</sup> Scotland,<sup>S28</sup> the United States,<sup>S29</sup> Italy,<sup>S30</sup> and Hong Kong, China,<sup>S35</sup> included between 104 and 721 participants.

There were 7 studies of young adults<sup>S37-S43</sup> from Australia,<sup>S37</sup> Switzerland,<sup>S38</sup> the United Kingdom,<sup>S39,S42</sup> the United States,<sup>S40</sup> Japan,<sup>S41</sup> and Canada,<sup>S43</sup> which assessed between 1,039 and 3,694 participants. There were also 28 studies of university students,<sup>S44-S71</sup> including 10 from China,<sup>S45,S52,S54-S58,S68-S70</sup> 6 from the United States,<sup>S48,S50,S59-S61,S71</sup> three from the United Kingdom,<sup>S47,S63,S64</sup> and one each from Portugal,<sup>S44</sup> Switzerland,<sup>S46</sup> Lithuania,<sup>S49</sup> Canada,<sup>S51</sup> the Netherlands,<sup>S53</sup> India,<sup>S62</sup> Japan,<sup>S65</sup> combined Germany and Lithuania,<sup>S66</sup> and Germany.<sup>S67</sup> Of these, 9 included at least 1,000 participants (1,004 to 8,079).<sup>S45,S50,S55,S57-S59,S65,S68,S70</sup>

There were 30 studies of children and adolescents,<sup>S72-S101</sup> including 27 that focused mostly or entirely on adolescents (ages 10 to 19),<sup>S72-S77,S80-S94,S96-S101</sup> 3 mixed studies of children (ages up to 9 years) and adolescents,<sup>S78,S79,S95</sup> and none that focused only on children. There were studies with at least 1,000 participants from Japan,<sup>S73,S82</sup> the United Kingdom,<sup>S84</sup> China,<sup>S86,S95,S97,S100,S101</sup> Italy,<sup>S88</sup> Portugal,<sup>S89</sup> and Israel<sup>S94</sup> plus smaller studies from the Netherlands,<sup>S72,S75</sup> Brazil,<sup>S74</sup> Spain,<sup>S76,S81</sup> the United States,<sup>S77,S92</sup> China,<sup>S78,S79,S85,S99</sup> Lithuania,<sup>S80</sup> the United Kingdom,<sup>S83,S98</sup> Australia,<sup>S87</sup> Germany,<sup>S90, S91,S93</sup> and Sweden.<sup>S96</sup> Studies with data on adolescents from the Netherlands<sup>S72</sup> and Spain<sup>S76</sup> also reported data from parents, as did 7 additional studies from the United States,<sup>S102,S103,S108</sup> Canada,<sup>S104</sup> Brazil,<sup>S105</sup> Bangladesh,<sup>S106</sup> and Mexico,<sup>S107</sup> one of which included over 1,000 participants (N = 1,136).<sup>S105</sup>

There were 22 studies of people with pre-existing medical conditions,<sup>S29,S35,S109-S128</sup> including a study of 2,829 older adults with type 2 diabetes from the United States,<sup>S111</sup> a study of 2,176 patients with colorectal cancer from the Netherlands,<sup>S113</sup> and a study of 1,504 participants with rheumatic diseases from the United States.<sup>S120</sup> Nineteen other studies from the United States,<sup>S29,S109,S112,S114,S122</sup> the Netherlands,<sup>S110</sup> Japan,<sup>S115,S127,S128</sup> Spain,<sup>S116</sup> Turkey,<sup>S117</sup> New Zealand,<sup>S119</sup> China,<sup>S121</sup> Germany,<sup>S124</sup> Australia,<sup>S125</sup> Italy,<sup>S126</sup> Hong Kong, China,<sup>S35</sup> and multiple

countries,<sup>S118,S123</sup> included between 104 and 852 participants. There were also 4 studies of people with pre-existing mental health conditions, including a study of 12,653 people from the UK with a pre-COVID-19 depressive or anxiety disorder diagnosis<sup>S132</sup> and 3 studies of 110 to 144 outpatients from Italy or Paraguay,<sup>S129</sup> Taiwan,<sup>S130</sup> and the United States.<sup>S132</sup>

There were two studies of medical workers,<sup>S103,S133</sup> including a study of 180 physicians who were also parents from the United States<sup>S103</sup> and a study of 385 physicians in training from China.<sup>S133</sup>

There were three studies of people who identified as sexual or gender minorities, including 681 gay and bisexual men from Australia,<sup>S134</sup> 2,288 people with a range of gender identities from the United States,<sup>S135</sup> and 780 trans and non-binary individuals from Canada.<sup>S136</sup>

### **Risk of Bias and Adequacy of Study Methods and Reporting**

Ratings of risk of bias and adequacy of methods and reporting are shown in Supplementary Table 2. Overall, only the national probability-based cohort from the Netherlands<sup>S16,S17,S33</sup> was rated “Yes” on all items. Overall, 37 of 137 studies (27%) used sampling frames that were close representations of the target population; 32 of 137 (23%) used census or random sampling methods; 13 of 137 (9%) had response rates of at least 75% or established that the sample was representative, and 43 of 137 (31%) successfully followed up with at least 75% of participants or included methods to address dropout considerations. For adequate sample size, participant and setting description, use of valid assessment methods (which was an inclusion requirement for our systematic review), standard outcome collection methods, and appropriately analysed results, proportions with “Yes” ratings were between 73% and 100%.

### **Changes in Mental Health Symptoms**

Changes in mental health symptoms for individual studies by population category are shown in Supplementary Table 3 for general mental health, Supplementary Table 4 for anxiety symptoms, and Supplementary Table 5 for depression symptoms. Table 1 shows meta-

analyses results for the general population and other populations for continuously measured general mental health, anxiety symptoms, and depression symptoms.

### General Mental Health

Forest plots are shown in Supplementary Figures 1a to 1k. Estimated reduction in general mental health in the general population was minimal and not statistically significant (Supplementary Figure 1a; 11 cohorts, N = 30,185;  $SMD_{change} = 0.11$ , 95% CI -0.00 to 0.22;  $I^2 = 97\%$ ). Among subgroups, there was a small, statistically significant worsening for women or females (Supplementary Figure 1b; 6 cohorts, N = 10,329;  $SMD_{change} = 0.22$ , 95% CI 0.08 to 0.35;  $I^2 = 91\%$ ) and a small to medium, statistically significant worsening for parents (Supplementary Figure 1h; 3 cohorts, N = 932;  $SMD_{change} = 0.39$ , 95% CI 0.21 to 0.56;  $I^2 = 57\%$ ). Symptoms improved by a small amount among people with pre-existing mental health conditions (Supplementary Figure 1j; 2 cohorts, N = 457;  $SMD_{change} = -0.22$ , 95% CI -0.35 to -0.09;  $I^2 = 0\%$ ). No other subgroup change estimates were statistically significantly different from zero. The percentage of variance due to heterogeneity ( $I^2$ ) across analyses was high (57% to 99%), except for among people with pre-existing mental health conditions (0%).

Results did not change from the main analysis for university students in a sensitivity analysis, in which outcomes for one study from April 2020<sup>S63</sup> were replaced by a later measurement from October 2020<sup>S64</sup> (see Supplementary Figure 1k). Two large nationally sampled cohorts with continuous results from early 2020 reported dichotomous data from early and late 2020 but not continuous data for late 2020. Based on dichotomous data, the UK cohort saw an increase of 8.7% (95% CI 6.9% to 10.4%) of people with a GHQ-12 score of 4 or higher from pre-COVID-19 to April 2020, but this dissipated by September 2020 (change from pre-COVID-19 = 0.0%, 95% CI -2.0% to 1.9%).<sup>S12</sup> Results were similar in that cohort for subgroups of women or females, and men or males, older adults, and young adults.<sup>S12</sup> The general population cohort from the Netherlands, on the other hand, did not identify substantive changes from pre-COVID-19 in general mental health in either early or late 2020.<sup>S16,S17,S33</sup>

### Anxiety Symptoms

Forest plots for are shown in Supplementary Figures 2a to 2l. Pooling of general population cohorts resulted in a non-statistically significant estimate of change in anxiety symptoms from pre-COVID-19 that was close to zero (Supplementary Figure 2a; 4 cohorts, N = 2,632;  $SMD_{\text{change}} = 0.05$ , 95% CI -0.04 to 0.13;  $I^2 = 37\%$ ). Anxiety symptoms worsened statistically significantly by small amounts among women or females (Supplementary Figure 2b; 5 cohorts, N = 3,500;  $SMD_{\text{change}} = 0.20$ , 95% CI 0.12 to 0.29;  $I^2 = 41\%$ ) and parents (1 cohort, N = 147;  $SMD_{\text{change}} = 0.25$ , 95% CI 0.02 to 0.49). Estimates were non-statistically significant and close to zero for all other subgroups.  $I^2$  ranged from 0% to 41% for the general population, women or females, and men or males but was higher for all other subgroups (80% to 98%). For people with pre-existing medical conditions, results did not change in sensitivity analyses when data from September to October 2020 (Supplementary Figure 2k) or March 2021 (Supplementary Figure 2l) were substituted for results from early 2020 in one study with multiple assessments.<sup>S118</sup>

### Depression Symptoms

Forest plots are shown in Figures 3a to 3m. In general population cohorts, symptoms of depression increased statistically significantly by a minimal amount (Supplementary Figure 3a; 4 cohorts, N = 3,470;  $SMD_{\text{change}} = 0.12$ , 95% CI 0.01 to 0.24;  $I^2 = 81\%$ ). They also increased significantly by minimal to small amounts among women or females (Supplementary Figure 3b; 7 cohorts, N = 3,851;  $SMD_{\text{change}} = 0.22$ , 95% CI 0.05 to 0.40,  $I^2 = 89\%$ ), older adults (Supplementary Figure 3d; 7 cohorts, N = 7,419;  $SMD_{\text{change}} = 0.22$ , 95% CI 0.06 to 0.38,  $I^2 = 95\%$ ), university students (Supplementary Figure 3f; 19 cohorts, N = 26,164;  $SMD_{\text{change}} = 0.14$ , 95% CI 0.01 to 0.26,  $I^2 = 98\%$ ), and people who identified as sexual or gender minorities (Supplementary Figure 3k, 3 cohorts, N = 3,741;  $SMD_{\text{change}} = 0.19$ , 95% CI 0.10 to 0.28;  $I^2 = 67\%$ ). They improved minimally for people with pre-existing mental health conditions (Supplementary Figure 3j, 3 cohorts, N = 12,352;  $SMD_{\text{change}} = -0.05$ , 95% CI -0.08 to -0.03;  $I^2 =$

0%).  $I^2$  was 0% for people with pre-existing mental health conditions and 67% to 98% in all other analyses. Results did not change for people with pre-existing medical conditions in two sensitivity analyses (Supplementary Figures 3l and 3m).

**Supplementary Table 1. Characteristics of unique studies (N=137) from included cohorts (N=134)<sup>a</sup>**

| First Author              | Outcome Domains       |                                                                 |                                                                    | Description of Participants                                                                                | Country(ies) of Participants | Pre- and Post-COVID-19 Data Collection | N Participants                              | Participant Age                                          |                                              |
|---------------------------|-----------------------|-----------------------------------------------------------------|--------------------------------------------------------------------|------------------------------------------------------------------------------------------------------------|------------------------------|----------------------------------------|---------------------------------------------|----------------------------------------------------------|----------------------------------------------|
|                           | General Mental Health | Anxiety Symptoms                                                | Depression Symptoms                                                |                                                                                                            |                              |                                        |                                             | Mean (SD) or % in Range of Years                         | % Female or Women                            |
| <b>General Population</b> |                       |                                                                 |                                                                    |                                                                                                            |                              |                                        |                                             |                                                          |                                              |
| Bulbulia <sup>S1</sup>    | K6                    |                                                                 |                                                                    | Convenience sample of adults aged 18 to 65 from the New Zealand Attitudes and Values Study (NZAVS)         | New Zealand                  | NR/2018<br>03-04/2020                  | 940                                         | 52 (13)                                                  | 65%                                          |
| Castellini <sup>S2</sup>  | BSI-GSI               |                                                                 |                                                                    | Convenience sample of adults aged 18 to 60 years recruited via “convenience and snowballing” methods       | Italy                        | 12/2019<br>04-05/2020                  | 130                                         | 34 (14) <sup>b</sup>                                     | 75%                                          |
| Chan <sup>S3</sup>        |                       | HAI                                                             |                                                                    | Convenience sample of adults based in Hong Kong and participated in a previous study prior to the pandemic | Hong Kong, China             | 07/2019<br>07/2020                     | 279                                         | 27 (9)                                                   | 74%                                          |
| Finucane <sup>S4</sup>    | K6                    |                                                                 |                                                                    | Participants from the Pittsburgh Hill/Homewood Research on Neighborhood Changes and Health study           | USA                          | 05-09/2018<br>06-09/2020               | 419                                         | 62 (14)                                                  | 82%                                          |
| Ge <sup>S5</sup>          |                       | GAD-7                                                           | PHQ-9                                                              | Convenience sample of adults recruited from the WeChat of China online social media platform               | China                        | 01-12/2019<br>02-03/2020               | 1,547-1,978                                 | Anxiety sample = 30 (10);<br>Depression sample = 33 (11) | Anxiety sample: 29;<br>Depression sample: 26 |
| Haliwa <sup>S6</sup>      |                       | Sample 1: GAD-7<br>Sample 2: DASS-21-Anxiety<br>Sample 3: GAD-7 | Sample 1: PHQ-8<br>Sample 2: DASS-21-Depression<br>Sample 3: PHQ-8 | U.S. residents recruited through Amazon’s Mechanical Turk                                                  | USA                          | 09-12/2019<br>04-06/2020               | Sample 1: 300; Sample 2: 146; Sample 3: 142 | Sample 1: 41 (12); Sample 2: 44 (13); Sample 3: 41 (13)  | Sample 1: 59; Sample 2: 53; Sample 3: 50     |
| Kanbur <sup>S7</sup>      | SCL-90-R              |                                                                 |                                                                    |                                                                                                            | Turkey                       | NR/2019                                | 400                                         | NR                                                       | NR                                           |

|                                                                      |                                         |                     |                        |                                                                                                                     |                             |  |                                 |                                                  |                                                               |
|----------------------------------------------------------------------|-----------------------------------------|---------------------|------------------------|---------------------------------------------------------------------------------------------------------------------|-----------------------------|--|---------------------------------|--------------------------------------------------|---------------------------------------------------------------|
|                                                                      |                                         | SCL-90-R<br>Anxiety | SCL-90-R<br>Depression | Turkish office workers who were enrolled in another study before the pandemic                                       |                             |  | NR/2020                         |                                                  |                                                               |
| Katz, B <sup>S8</sup>                                                | RRQ                                     |                     |                        |                                                                                                                     |                             |  | 04/2019                         |                                                  |                                                               |
|                                                                      | DToS                                    | DASS-21<br>Anxiety  | DASS-21<br>Depression  | Convenience sample of adults recruited via an online crowdsourcing research platform                                | Canada, Ireland,<br>UK, USA |  |                                 | 218                                              | 43 (13)<br>54%                                                |
| Latikka <sup>S9</sup>                                                | GHQ-12                                  |                     |                        | Participants from the Social Media at Work in Finland Survey                                                        | Finland                     |  | 04/2020                         |                                                  |                                                               |
|                                                                      |                                         |                     |                        |                                                                                                                     |                             |  | 09-10/2019                      | 840                                              | 44 (11)<br>44%                                                |
| Megias-<br>Robles <sup>S10</sup>                                     | PANAS-NA                                |                     |                        | Convenience sample of participants recruited from an adult community sample                                         | Spain                       |  | 11/2019                         |                                                  |                                                               |
|                                                                      |                                         |                     |                        |                                                                                                                     |                             |  | 04/2020                         | 102                                              | 30 (13)<br>66%                                                |
| Pierce <sup>S11</sup>                                                |                                         |                     |                        |                                                                                                                     |                             |  | Pre-COVID-19 waves <sup>c</sup> |                                                  | 18-34 (12) <sup>e</sup>                                       |
| Daly <sup>S12</sup>                                                  | GHQ-12                                  |                     |                        | National probability-based sample of adults aged ≥ 18 years (United Kingdom Household Longitudinal Study)           | UK                          |  |                                 | 15,376 <sup>S11,d</sup><br>10,918 <sup>S12</sup> | 35-49 (22) <sup>e</sup><br>58% <sup>S12</sup>                 |
|                                                                      |                                         |                     |                        |                                                                                                                     |                             |  | 04-09/2020                      |                                                  | 50-64 (34) <sup>e</sup><br>65+ (32) <sup>e</sup>              |
| Shimura <sup>S13</sup>                                               | BJSQ<br>(Psychological<br>and Physical) |                     |                        | Convenience sample of office workers who started remote work in 2020                                                | Japan                       |  | NR/2019                         |                                                  |                                                               |
|                                                                      |                                         |                     |                        |                                                                                                                     |                             |  | NR/2020                         | 3,123                                            | 37 (11)<br>43%                                                |
| Soltanzadeh <sup>S14</sup>                                           | GHQ-28                                  |                     |                        | Employees of three oil refineries in southern Iran who had at least 1 year of work experience                       | Iran                        |  | 11/2019                         |                                                  |                                                               |
|                                                                      |                                         |                     |                        |                                                                                                                     |                             |  | 07/2020                         | 823-850                                          | 35 (13)<br>19%                                                |
| Thygesen <sup>S15</sup>                                              | SWEMWBS                                 |                     |                        | Participants from Danish Health and Wellbeing Survey                                                                | Denmark                     |  | 09-12/2019                      |                                                  | Age range (%)<br>15-44 (27); 45-59 (30); 60-74 (33); 75+ (10) |
|                                                                      |                                         |                     |                        |                                                                                                                     |                             |  | 09-11/2020                      | 4,234                                            | 58%                                                           |
| van der<br>Velden <sup>S16</sup><br>van der<br>Velden <sup>S17</sup> | MHI-5                                   |                     |                        | National probability-based sample of adults aged ≥ 18 years (Longitudinal Internet Studies for the Social Sciences) | The Netherlands             |  | 03/2019                         | 3,983                                            | 18-34 (25) <sup>f</sup>                                       |
|                                                                      |                                         |                     |                        |                                                                                                                     |                             |  | 11-12/2019                      | 4,064                                            | 35-49 (23) <sup>f</sup><br>50-64 (26) <sup>f</sup>            |

|                         |             |                                                                                                                                                     |                                                                                           |            |                              |         |         |     |
|-------------------------|-------------|-----------------------------------------------------------------------------------------------------------------------------------------------------|-------------------------------------------------------------------------------------------|------------|------------------------------|---------|---------|-----|
| Wanberg <sup>S18</sup>  | PHQ-8       | Individuals aged 30 to 80 years from the RANT American Life Panel                                                                                   | USA                                                                                       | 03/2020    | 1,143                        | 53 (14) | 56%     |     |
|                         |             |                                                                                                                                                     |                                                                                           | 11-12/2020 |                              |         |         |     |
|                         |             |                                                                                                                                                     |                                                                                           | 04-06/2019 |                              |         |         |     |
|                         |             |                                                                                                                                                     |                                                                                           | 04/2020    |                              |         |         |     |
| <b>Older Adults</b>     |             |                                                                                                                                                     |                                                                                           |            |                              |         |         |     |
| Bartlett <sup>S19</sup> | HADS-A      | HADS-D                                                                                                                                              | Adults aged ≥ 50 years from the Island Study Linking Ageing and Neurodegenerative Disease | Australia  | 10/2019                      | 1,671   | 63 (7)  | 73% |
|                         |             |                                                                                                                                                     |                                                                                           |            | 04-06/2020                   |         |         |     |
| Briggs <sup>S20</sup>   | CES-D-8     | Nationally representative sample of community-dwelling older adults aged ≥ 50 years who took part in the Irish Longitudinal Study on Ageing (TILDA) | Ireland                                                                                   | NR/2018    | 3,490                        | 70 (14) | 56%     |     |
|                         |             |                                                                                                                                                     |                                                                                           | 07-11/2020 |                              |         |         |     |
| Creese <sup>S21</sup>   | GAD-7       | PHQ-9                                                                                                                                               | National convenience sample of adults aged ≥ 50 years recruited via publicity             | UK         | 10/2019                      | 3,281   | 67 (7)  | 80% |
|                         |             |                                                                                                                                                     |                                                                                           |            | 05-06/2020                   |         |         |     |
| Eliassen <sup>S22</sup> | WHOQOL-BREF | WHOQOL-BREF (psychological health)                                                                                                                  | Participants from the Faroese Septuagenarians cohort                                      | Denmark    | 12/2017-01/2019 <sup>g</sup> | 227     | 84 (1)  | 52% |
|                         |             |                                                                                                                                                     |                                                                                           |            |                              |         |         |     |
| Herrera <sup>S23</sup>  | GAI-SF      | PHQ-9                                                                                                                                               | Participants from the V National Survey on Quality of Life in Older Adults                | Chile      | 06-07/2020                   | 721     | 72 (NR) | 70% |
|                         |             |                                                                                                                                                     |                                                                                           |            | 11/2019                      |         |         |     |
| Kera <sup>S24</sup>     | WHO-5-J     | Community-dwelling older adults living in Itabashi Ward, Tokyo, who had participated in the Otassha Study                                           | Japan                                                                                     | 09/2020    | 533                          | 73 (6)  | 62%     |     |
|                         |             |                                                                                                                                                     |                                                                                           | 09-10/2019 |                              |         |         |     |
| Kivi <sup>S25</sup>     | SWLS        | "Nationally representative" sample of older adults born 1949 to 1955                                                                                | Sweden                                                                                    | 06-07/2020 | 1,071                        | 68 (2)  | 47%     |     |
|                         |             |                                                                                                                                                     |                                                                                           | NR/2019    |                              |         |         |     |
|                         |             |                                                                                                                                                     |                                                                                           | 03-04/2020 |                              |         |         |     |

|                                  |                                  |            |          |                                                                                                                     |                 |                                  |           |         |      |
|----------------------------------|----------------------------------|------------|----------|---------------------------------------------------------------------------------------------------------------------|-----------------|----------------------------------|-----------|---------|------|
| Lee <sup>S26</sup>               |                                  |            | PHQ-9    | Participants from the PopulatiON HEalth and Eye Disease PRofile in Elderly Singaporeans study                       | Singapore       | 12/2017-11/2019 <sup>g</sup>     | 496       | 74 (8)  | 55%  |
|                                  |                                  |            |          |                                                                                                                     |                 | 05-06/2020                       |           |         |      |
| Martínez <sup>S27</sup>          | PWBS<br>PERMA - PA<br>PERMA - NA |            | CES-D    | Community-dwelling older adults aged 65 to 87 years                                                                 | Spain           | 10/2019                          | 141       | 73 (5)  | 60%  |
|                                  |                                  |            |          |                                                                                                                     |                 | 04/2020                          |           |         |      |
| Okely <sup>S28</sup>             | WEMWBS                           |            |          | Surviving members of cohort of all children born in 1936 and attending school in Scotland in 1947                   | Scotland (UK)   | NR/2017-<br>NR/2019 <sup>g</sup> | 137       | 84 (NR) | 48%  |
|                                  |                                  |            |          |                                                                                                                     |                 | 05-06/2020                       |           |         |      |
| Rentscher <sup>S29</sup>         |                                  | STAI-State | CES-D    | Women aged ≥ 60 years who were nonmetastatic breast cancer survivors                                                | USA             | 02-06/2019                       | 262       | 68 (5)  | 100% |
|                                  |                                  |            |          |                                                                                                                     |                 | 05-09/2020                       |           |         |      |
| Rentscher <sup>S29</sup>         |                                  | STAI-State | CES-D    | Women aged ≥ 60 years who were matched controls                                                                     | USA             | 02-06/2019                       | 165       | 68 (6)  | 100% |
|                                  |                                  |            |          |                                                                                                                     |                 | 05-09/2020                       |           |         |      |
| Sardella <sup>S30</sup>          | SF-12 Mental Component Summary   |            |          | Participants aged ≥ 65                                                                                              | Italy           | 10/2018-10/2019                  | 104       | 80 (7)  | 70%  |
|                                  |                                  |            |          |                                                                                                                     |                 | 04/2020                          |           |         |      |
| Siew <sup>S31</sup>              | WHOQOL-AGE                       | GAI-SF     |          | Participants from the Community Health and Intergenerational study                                                  | Singapore       | 02/2018-01/2020 <sup>h</sup>     | 411       | 69 (6)  | 65%  |
|                                  |                                  |            |          |                                                                                                                     |                 | 05-06/2020                       |           |         |      |
| van den Besselaar <sup>S32</sup> |                                  | HADS-A     | CES-D-10 | Participants from the Longitudinal Aging Study Amsterdam                                                            | The Netherlands | NR/2018-2019                     | 984-1,068 | 74 (8)  | 53%  |
|                                  |                                  |            |          |                                                                                                                     |                 | 06-10/2020                       |           |         |      |
| van Tilburg <sup>S33</sup>       | MHI-5                            |            |          | National probability-based sample of adults aged ≥ 65 years (Longitudinal Internet Studies for the Social Sciences) | The Netherlands | 10-11/2019                       | 1,679     | 73 (NR) | 49%  |
|                                  |                                  |            |          |                                                                                                                     |                 | 05/2020                          |           |         |      |
| Wang, Yi <sup>S34</sup>          | K10                              |            |          |                                                                                                                     | China           | 05-06/2019                       | 2,745     |         | 64%  |

|                          |                    |         |                                                                                          |                                                                                                                                                                                               |                  |                              |                                 |                  |
|--------------------------|--------------------|---------|------------------------------------------------------------------------------------------|-----------------------------------------------------------------------------------------------------------------------------------------------------------------------------------------------|------------------|------------------------------|---------------------------------|------------------|
|                          |                    |         | Adults aged ≥ 60 years who were part of the Shandong Rural Elderly Health Cohort (SREHC) |                                                                                                                                                                                               | 08-09/2020       |                              | Median (Age range): 70 (60-100) |                  |
| Wong, S <sup>S35</sup>   |                    | GAD-7   | PHQ-9                                                                                    | Adults aged ≥ 60 with ≥ 2 chronic medical conditions from 4 primary care clinics                                                                                                              | Hong Kong, China | 04/2018-03/2019              | 583                             | 71 (6) 73%       |
|                          |                    |         |                                                                                          |                                                                                                                                                                                               |                  | 03-04/2020                   |                                 |                  |
| Yu <sup>S36</sup>        |                    | GAI     | GDS                                                                                      | Individuals aged 60 to 99 years living in the western region of Singapore                                                                                                                     | Singapore        | 02/2018-01/2020 <sup>h</sup> | 419                             | 69 (6) 66%       |
|                          |                    |         |                                                                                          |                                                                                                                                                                                               |                  | 05-06/2020                   |                                 |                  |
| <b>Young Adults</b>      |                    |         |                                                                                          |                                                                                                                                                                                               |                  |                              |                                 |                  |
| Islam <sup>S37</sup>     | K10                |         |                                                                                          | Individuals aged 20 to 21 who took part in the Longitudinal Study of Australian Children (LSAC) survey                                                                                        | Australia        | NR/2018                      | 1,110                           | 21 (0) 59%       |
|                          |                    |         |                                                                                          |                                                                                                                                                                                               |                  | 10-12/2020                   |                                 |                  |
| Marmet <sup>S38</sup>    |                    |         | MDI                                                                                      | Swiss adult men who enrolled in a longitudinal cohort in 2010-2011 during medical evaluation for mandatory military service                                                                   | Switzerland      | 04/2019-02/2020 <sup>h</sup> | 2,345                           | 29 (13) 0%       |
|                          |                    |         |                                                                                          |                                                                                                                                                                                               |                  | 05-06/2020                   |                                 |                  |
| Rimfeld <sup>S39</sup>   |                    | SMGAD-A | SMFQ                                                                                     | Adult twins born 1994-1996 who were enrolled in a longitudinal cohort at age 18 months                                                                                                        | UK               | NR/2018                      | 3,563-3,694                     | 24-26 (100%) 63% |
|                          |                    |         |                                                                                          |                                                                                                                                                                                               |                  | 04-05/2020                   |                                 |                  |
| Romm <sup>S40</sup>      |                    |         | PHQ-2                                                                                    | Adults aged 18 to 34 years in one of the six metropolitan statistical areas who participated in the Vape Shop Advertising, Place characteristics and Effects Surveillance study               | USA              | 09/2019                      | 1,082                           | 25 (5) 51%       |
|                          |                    |         |                                                                                          |                                                                                                                                                                                               |                  | 03/2020                      |                                 |                  |
| Tanioka <sup>S41</sup>   | K6-J<br>SF-8 - MCS |         |                                                                                          | Participants aged 15 to 30 years who took part in a comprehensive prospective research project on sleep behavior, sleep problems, psychological distress, and quality of life in young adults | Japan            | 10/2019                      | 2,222                           | 21 (4) 76%       |
|                          |                    |         |                                                                                          |                                                                                                                                                                                               |                  | 05/2020                      |                                 |                  |
| Villadsen <sup>S42</sup> | K6                 |         |                                                                                          | Participants from the Millennium Cohort Study who were born in 2001                                                                                                                           | UK               | NR/2018                      | 1,615                           | Range: 19-20 NR  |
|                          |                    |         |                                                                                          |                                                                                                                                                                                               |                  | 05/2020                      |                                 |                  |

|                               |          |                    |                    |                                                                                                                       |             |                               |             |         |     |
|-------------------------------|----------|--------------------|--------------------|-----------------------------------------------------------------------------------------------------------------------|-------------|-------------------------------|-------------|---------|-----|
| Watkins-Martin <sup>S43</sup> |          | GAD-7              | CES-D-12           | Participants born in 1997-98 in Quebec, Canada who participated in the Québec Longitudinal Study of Child Development | Canada      | NR/2018<br>08/2020            | 1,039       | 22 (NR) | 60% |
| <b>University Students</b>    |          |                    |                    |                                                                                                                       |             |                               |             |         |     |
| Conceição <sup>S44</sup>      |          | GAD-7              | PHQ-9              | First-year students at the University of Porto                                                                        | Portugal    | 10/2019<br>06/2020            | 341         | 20 (2)  | 75% |
| Dong <sup>S45</sup>           | SCL-90-R |                    |                    | First-year undergraduate students from a single university recruited online                                           | China       | 09/2019<br>NR/2020            | 4,085-4,341 | 19 (1)  | 77% |
| Elmer <sup>S46</sup>          |          | GAD-7              | CES-D              | Undergraduate students in engineering and natural sciences from a single university recruited by email invitation     | Switzerland | 09/2019<br>04/2020            | 209         | NR      | 22% |
| Evans <sup>S47</sup>          | WEMWBS   | HADS-A             | HADS-D             | First or second year undergraduate psychology students                                                                | UK          | 10/2019<br>05/2020            | 254         | 20 (1)  | 86% |
| Fuller-Rowell <sup>S48</sup>  |          |                    | BDI-II             | Undergraduate students at a four-year university in the southeastern United States                                    | USA         | 09/2018-04/2019<br>04-06/2020 | 263         | 19 (1)  | 53% |
| Gelezelyte <sup>S49</sup>     |          | DASS-21 Anxiety    | DASS-21 Depression | First-year university students                                                                                        | Lithuania   | 10-12/2019<br>10-12/2020      | 474         | 19 (1)  | 76% |
| Gopalan <sup>S50</sup>        |          | CCAPS-62 - Anxiety | CES-D-10           | Undergraduate students from a large, multicampus public university                                                    | USA         | 11/2019<br>05/2020            | 1,004       | 19 (1)  | 62% |
| Hamza <sup>S51</sup>          |          | GAD-7              | CES-D-R            | Undergraduate students from single university recruited by email invitation                                           | Canada      | 05/2019<br>05/2020            | 733         | 19 (1)  | 74% |

|                              |  |                               |                    |                                                                                                   |                 |                              |             |                              |     |
|------------------------------|--|-------------------------------|--------------------|---------------------------------------------------------------------------------------------------|-----------------|------------------------------|-------------|------------------------------|-----|
| He <sup>S52</sup>            |  | STAI-Trait                    |                    | Individuals who took part in the Behavioral Brain Research Project of Chinese Personality         | China           | 09-12/2019                   | 589         | 19 (1)                       | 71% |
|                              |  |                               |                    |                                                                                                   |                 | 02/2020                      |             |                              |     |
|                              |  |                               |                    |                                                                                                   |                 | 01/2019-01/2020 <sup>h</sup> |             |                              |     |
| Koelen <sup>S53</sup>        |  | GAD-7                         | CES-D              | Students at the University of Amsterdam                                                           | The Netherlands |                              | 671-683     | 23 (6)                       | 70% |
|                              |  |                               |                    |                                                                                                   |                 | 04-05/2020                   |             |                              |     |
| Li, H <sup>S54</sup>         |  | PHQ-4<br>PANAS-PA<br>PANAS-NA |                    | Undergraduate students from a single university enrolled in an ongoing longitudinal study         | China           | 12/2019                      | 555         | 20 (3)                       | 77% |
|                              |  |                               |                    |                                                                                                   |                 | 02/2020                      |             |                              |     |
| Li, R <sup>S55</sup>         |  | SCL-90-R                      |                    | Undergraduate students from multiple universities in Szechuan province recruited online           | China           | 09/2019                      | 2,603       | NR                           | 53% |
|                              |  |                               |                    |                                                                                                   |                 | 04/2020                      |             |                              |     |
| Li, Wendy Wen <sup>S56</sup> |  | DASS-21 Anxiety               | DASS-21 Depression | Undergraduate students from single university recruited by email invitation                       | China           | 11/2019                      | 173         | 20 (1)                       | 78% |
|                              |  |                               |                    |                                                                                                   |                 | 03/2020                      |             |                              |     |
| Liu <sup>S57</sup>           |  |                               | PHQ-9<br>CID1 3.0  | First-year students of two medical universities located in three cities (Jining, Weifang, Rizhao) | China           | 04-10/2018-04-10/2019        | 5,373-8,079 | 18 (1)                       | 60% |
|                              |  |                               |                    |                                                                                                   |                 | 09-10/2020                   |             |                              |     |
| Lu <sup>S58</sup>            |  | GAD-7                         | PHQ-9              | Students from Chinese Undergraduate Cohort study                                                  | China           | 09-10/2019                   | 5,181       | 14-17: 0.5%;<br>18-24: 99.5% | 62% |
|                              |  |                               |                    |                                                                                                   |                 | 04/2020                      |             |                              |     |
| Mauer <sup>S59</sup>         |  | DASS-21                       |                    | Undergraduate students from 11 American universities                                              | USA             | 09-12/2019                   | 1,434       | 20 (1)                       | 76% |
|                              |  |                               |                    |                                                                                                   |                 | 03-06/2020                   |             |                              |     |
| Mehus <sup>S60</sup>         |  | GAD-7                         | PHQ-9              | First year college students aged 18 to 23 years                                                   | USA             | 08,12/2019                   | 727         | 18 (94%)<br>19 (6%)          | 64% |
|                              |  |                               |                    |                                                                                                   |                 | 04/2020                      |             |                              |     |
| Ratner <sup>S61</sup>        |  |                               | BDI-II             |                                                                                                   | USA             | 09/2019                      | 152         | 21 (1)                       | 72% |

|                                          |          |                   |                      |                                                                                                                           |                      |            |                                 |                                       |                               |
|------------------------------------------|----------|-------------------|----------------------|---------------------------------------------------------------------------------------------------------------------------|----------------------|------------|---------------------------------|---------------------------------------|-------------------------------|
|                                          |          |                   |                      | Fourth-year university students from Cornell University                                                                   |                      | 04/2020    |                                 |                                       |                               |
| Saraswathi <sup>S62</sup>                |          | DASS-21 Anxiety   | DASS-21 Depression   | Convenience sample of undergraduate university medical students                                                           | India                | 12/2019    | 217                             | 20 (2)                                | 64%                           |
|                                          |          |                   |                      |                                                                                                                           |                      | 06/2020    |                                 |                                       |                               |
|                                          |          |                   |                      |                                                                                                                           |                      | 10/2019    |                                 | 18-21 (64)                            |                               |
| Savage, 2020 <sup>S63,i</sup>            | WEMWBS   |                   |                      | Undergraduate students from single university recruited by email invitation and enrolled in an ongoing longitudinal study | UK                   | 04/2020    | 214                             | 22-25 (22)                            | 72%                           |
|                                          |          |                   |                      |                                                                                                                           |                      |            |                                 | 26-35 (8)                             |                               |
|                                          |          |                   |                      |                                                                                                                           |                      |            |                                 | 35+ (6)                               |                               |
|                                          |          |                   |                      |                                                                                                                           |                      | 10/2019    |                                 | 18 (0)                                |                               |
| Savage, 2021 <sup>S64,i</sup>            | WEMWBS   |                   |                      | Undergraduate students from single university recruited by email invitation and enrolled in an ongoing longitudinal study | UK                   |            | 255                             | 19 (16)                               | 76%                           |
|                                          |          |                   |                      |                                                                                                                           |                      |            |                                 | 20 (28)                               |                               |
|                                          |          |                   |                      |                                                                                                                           |                      | 10/2020    |                                 | 21 (26)                               |                               |
|                                          |          |                   |                      |                                                                                                                           |                      |            |                                 | 22-25 (20)                            |                               |
|                                          |          |                   |                      |                                                                                                                           |                      |            |                                 | 26-35 (8)                             |                               |
|                                          |          |                   |                      |                                                                                                                           |                      |            |                                 | 35+ (2)                               |                               |
| Shiratori <sup>S65</sup>                 |          |                   | PHQ-9                | Students enrolled at the University of Tsukuba                                                                            | Japan                | NR/2019    | 6,847                           | 23 (6)                                | 41%                           |
|                                          |          |                   |                      |                                                                                                                           |                      | 06/2020    |                                 |                                       |                               |
| Truskauskaitė-Kuneviciene <sup>S66</sup> | PMH      | DASS-21 - Anxiety | DASS-21 - Depression | Emerging adults studying at a large university in the Ruhr region (Germany) or Vilnius (Lithuania)                        | Lithuania<br>Germany | 10-12/2019 | Lithuania: 450;<br>Germany: 325 | Lithuania: 19 (1);<br>Germany: 23 (3) | Lithuania: 79;<br>Germany: 78 |
|                                          |          |                   |                      |                                                                                                                           |                      | 03-04/2020 |                                 |                                       |                               |
|                                          |          |                   |                      |                                                                                                                           |                      | NR/2019    |                                 |                                       |                               |
| Voltmer <sup>S67</sup>                   |          | BSI-18 Anxiety    | BSI-18 Depression    | Students attending the University of Lübeck                                                                               | Germany              |            | 890                             | 24 (3)                                | 79%                           |
|                                          |          |                   |                      |                                                                                                                           |                      | 06/2020    |                                 |                                       |                               |
|                                          |          |                   |                      |                                                                                                                           |                      | 11/2019    |                                 |                                       |                               |
| Wang, Yitao <sup>S68</sup>               | SCL-90-R | SCL-90-R Anxiety  | SCL-90-R Depression  | First-year students at a medical university                                                                               | China                |            | 2,559                           | NR                                    | NR                            |
|                                          |          |                   |                      |                                                                                                                           |                      | 06/2020    |                                 |                                       |                               |
|                                          |          |                   |                      |                                                                                                                           |                      | 12/2018    |                                 |                                       |                               |
| Yang, X <sup>S69</sup>                   |          |                   | CES-D                | First-year students at Wenzhou Medical University in Zhejiang province                                                    | China                |            | 195                             | NR                                    | 59%                           |
|                                          |          |                   |                      |                                                                                                                           |                      | 06/2020    |                                 |                                       |                               |
| Yang, Ziyao <sup>S70</sup>               |          |                   |                      |                                                                                                                           | China                | 10/2019    | 2,364                           | 20 (1)                                | 54%                           |

|                          |  |                    |                       |                                                                                                             |     |         |     |        |     |
|--------------------------|--|--------------------|-----------------------|-------------------------------------------------------------------------------------------------------------|-----|---------|-----|--------|-----|
|                          |  | DASS-21<br>Anxiety | DASS-21<br>Depression | College students from Zhejiang<br>Ocean University                                                          |     | 05/2020 |     |        |     |
| Zimmerman <sup>S71</sup> |  | GAD-7              | PHQ-9                 | Undergraduate students at a<br>single university enrolled in a<br>mental health prevention<br>program study | USA | 08/2019 | 205 | 18 (1) | 76% |
|                          |  |                    |                       |                                                                                                             |     | 04/2020 |     |        |     |

---

### Children and Adolescents

---

|                            |                                          |  |            |                                                                                                                       |                 |                 |             |                          |     |
|----------------------------|------------------------------------------|--|------------|-----------------------------------------------------------------------------------------------------------------------|-----------------|-----------------|-------------|--------------------------|-----|
|                            | SDQ-Internalizing<br>Behaviors           |  |            |                                                                                                                       |                 | 01-11/2019      |             |                          |     |
| Achterberg <sup>S72</sup>  | SDQ-Externalizing<br>Behaviors           |  |            | Children aged 10 to 13 years<br>who enrolled in a longitudinal<br>twin study in 2015-2016                             | The Netherlands |                 | 151         | 12 (1)                   | 47% |
|                            |                                          |  |            |                                                                                                                       |                 | 04-05/2020      |             |                          |     |
| Adachi <sup>S73</sup>      |                                          |  | PHQ-A      | Fourth to seventh graders from<br>the Assessment of Preschool to<br>Adolescence—Longitudinal<br>Epidemiological study | Japan           | 09/2019         | 4,118-4,126 | Range: 9-12              | 50% |
|                            |                                          |  |            |                                                                                                                       |                 | 07/2020         |             |                          |     |
| Bado <sup>S74</sup>        | SDQ - Total score                        |  |            |                                                                                                                       |                 | NR/2018-2019    |             |                          |     |
|                            | SDQ - Emotion<br>subscale                |  |            | Primarily adolescents from the<br>Brazilian High-Risk Cohort for<br>Mental Conditions                                 | Brazil          |                 | 672         | Mean: 19<br>Range: 16-24 | 53% |
|                            |                                          |  |            |                                                                                                                       |                 | 04/2020-04/2021 |             |                          |     |
| Bernasco <sup>S75</sup>    | RCADS - Parent<br>RCADS -<br>Adolescents |  |            | Urban young adolescents in their<br>final year of primary school                                                      | The Netherlands | 09-12/2019      | 245         | 12 (1)                   | 50% |
|                            |                                          |  |            |                                                                                                                       |                 | 04-07/2020      |             |                          |     |
| Bosch <sup>S76</sup>       | SDQ - Emotion<br>Symptoms<br>SDQ - Total |  |            | Students in secondary education<br>from INSchool study                                                                | Spain           | NR/2019         | 552         | 15 (1)                   | 61% |
|                            |                                          |  |            |                                                                                                                       |                 | 05-06/2020      |             |                          |     |
| Charmaraman <sup>S77</sup> |                                          |  | CES-D-R-10 | Students in grades 6 to 9 in two<br>school districts in northeastern<br>United States                                 | USA             | NR/2019         | 586         | 14 (1)                   | 53% |
|                            |                                          |  |            |                                                                                                                       |                 | 10-12/2020      |             |                          |     |
| Chen, I-H <sup>S78</sup>   | DASS-21                                  |  |            | Primary school students                                                                                               | China           | 10-11/2019      | 535         | 10 (1)                   | 50% |

|                           |                          |                   |                      |                                                                                                                                                           |           |              |       |              |     |
|---------------------------|--------------------------|-------------------|----------------------|-----------------------------------------------------------------------------------------------------------------------------------------------------------|-----------|--------------|-------|--------------|-----|
| Chen, C-Y <sup>S79</sup>  | DASS-21                  | DASS-21 - Anxiety | DASS-21 - Depression | Schoolchildren in grades 3 to 6 enrolled in 3 primary schools in Sichuan province                                                                         | China     | 03/2020      | 575   | 11 (1)       | NR  |
|                           |                          |                   |                      |                                                                                                                                                           |           | 10-11/2019   |       |              |     |
| Daniunaite <sup>S80</sup> | SDQ - Emotional Symptoms |                   |                      | Adolescents aged 12 to 16 years from the Stress and Resilience in Adolescence study                                                                       | Lithuania | 01/2020      | 331   | 14 (2)       | 57% |
|                           |                          |                   |                      |                                                                                                                                                           |           | 03-05/2019   |       |              |     |
| Ezpeleta <sup>S81</sup>   | SDQ-total Parent Version |                   |                      | Families of children who were enrolled in a longitudinal cohort at age 3 (parents responded to measure of child mental health)                            | Spain     | 09-10/2020   | 197   | 14 (0)       | 52% |
|                           |                          |                   |                      |                                                                                                                                                           |           | NR/2019      |       |              |     |
| Fujihara <sup>S82</sup>   | K6                       |                   |                      | Japanese junior high school students                                                                                                                      | Japan     | 06/2020      | 1,854 | NR           | 51% |
|                           |                          |                   |                      |                                                                                                                                                           |           | 12/2019      |       |              |     |
| Hu <sup>S83</sup>         | SDQ - Emotion Problems   |                   |                      | Adolescents aged 10 to 16 years who took part in the Understanding Society survey                                                                         | UK        | 02/2020      | 886   | 13 (1)       | 52% |
|                           |                          |                   |                      |                                                                                                                                                           |           | NR           |       |              |     |
| Knowles <sup>S84</sup>    | SDQ score                | GAD-7             | SMFQ                 | Adolescents recruited from twelve local secondary schools. Participants were part of the Resilience, Ethnicity, and AdolesCent Mental Health cohort study | UK        | 07/2020      | 1,047 | Range: 12-18 | 55% |
|                           |                          |                   |                      |                                                                                                                                                           |           | NR/2018-2019 |       |              |     |
| Li, Y <sup>S85</sup>      |                          | ZSAS              | BDI-II               | Students aged 14 to 19 years from three public commuter secondary vocational schools in Southern China province                                           | China     | 05-08/2020   | 831   | 16 (1)       | 61% |
|                           |                          |                   |                      |                                                                                                                                                           |           | 12/2019      |       |              |     |
| Liao <sup>S86</sup>       |                          |                   | CES-DC               | Students from 3 junior high schools in Sichuan province                                                                                                   | China     | 03/2020      | 2,496 | 13 (1)       | 50% |
|                           |                          |                   |                      |                                                                                                                                                           |           | 12/2019      |       |              |     |
| Magson <sup>S87</sup>     |                          | SCAS              | SMFQ                 | Adolescents aged 13 to 16 years who were enrolled in a longitudinal cohort 4 years prior                                                                  | Australia | 07/2020      | 248   | 14 (1)       | 51% |
|                           |                          |                   |                      |                                                                                                                                                           |           | NR/2019      |       |              |     |

|                         |                                              |                     |                        |                                                                                                       |          |                              |       |              |     |
|-------------------------|----------------------------------------------|---------------------|------------------------|-------------------------------------------------------------------------------------------------------|----------|------------------------------|-------|--------------|-----|
|                         |                                              |                     |                        |                                                                                                       |          | 05/2020                      |       |              |     |
| Mastorci <sup>S88</sup> | KIDSCREEN-52<br>(psychological<br>wellbeing) |                     |                        | Students aged 10 to 14 years                                                                          | Italy    | 09-10/2019                   | 1,019 | 13 (1)       | 52% |
|                         | KIDSCREEN-52<br>(mood/emotion)               |                     |                        |                                                                                                       |          | 04/2020                      |       |              |     |
| Meireles <sup>S89</sup> | KIDSCREEN-10                                 |                     |                        | Adolescents aged 12 to 16 years<br>who attended schools in the<br>north of Portugal                   | Portugal | 04-07/2019                   | 1,099 | 13 (1)       | 53% |
|                         |                                              |                     |                        |                                                                                                       |          | 05-06/2020                   |       |              |     |
| Naumann <sup>S90</sup>  |                                              |                     | STDS                   | Adolescents and young adults<br>from the German Family Panel<br>Pairfam study                         | Germany  | 11/2018-07/2019              | 854   | Range: 16-19 | 58% |
|                         |                                              |                     |                        |                                                                                                       |          | 05-07/2020                   |       |              |     |
| Paizan <sup>S91</sup>   | SWLS                                         |                     |                        | 6th to 10th graders in schools<br>with a high proportion of ethnic<br>minorities                      | Germany  | 06-10/2019                   | 226   | 14 (1)       | 56% |
|                         |                                              |                     |                        |                                                                                                       |          | 05-07/2020                   |       |              |     |
| Polack <sup>S92</sup>   |                                              |                     | CDI-S                  | Individuals aged 9 to 15 years                                                                        | USA      | 01-09/2019                   | 112   | 13 (2)       | 55% |
|                         |                                              |                     |                        |                                                                                                       |          | 03-06/2020                   |       |              |     |
| Rau <sup>S93</sup>      | KIDSCREEN-10                                 | RCADS -<br>Anxiety  | RCADS -<br>Depression  | 5 <sup>th</sup> to 11th graders from 3<br>German schools                                              | Germany  | 10-11/2019                   | 777   | 13 (2)       | 53% |
|                         |                                              |                     |                        |                                                                                                       |          | 06-07/2020                   |       |              |     |
| Shoshani <sup>S94</sup> | PANAS-C - PE<br>PANAS-C - NE<br>GSI-18 - BSI | BSI-18 -<br>Anxiety | BSI-18 -<br>Depression | 5th to 11th graders from 38<br>schools in three representative<br>geographical areas in Israel        | Israel   | 09/2019                      | 1,537 | 14 (2)       | 52% |
|                         |                                              |                     |                        |                                                                                                       |          | 05/2020                      |       |              |     |
| Teng <sup>S95</sup>     |                                              | STAI-Trait          | CES-D                  | Primary and middle school<br>students                                                                 | China    | 10-11/2019                   | 1,778 | NR           | 49% |
|                         |                                              |                     |                        |                                                                                                       |          | 04-05/2020                   |       |              |     |
| Vira <sup>S96</sup>     | SDQ-emotional<br>problems                    |                     |                        | Middle school students from the<br>Peer Relations In School from an<br>Ecological perspective project | Sweden   | 10/2019-01/2020 <sup>h</sup> | 849   | 10 (0)       | 52% |

|                                    |                   |                      |                                                                                                                                                     |       |                 |             |              |     |
|------------------------------------|-------------------|----------------------|-----------------------------------------------------------------------------------------------------------------------------------------------------|-------|-----------------|-------------|--------------|-----|
|                                    |                   |                      |                                                                                                                                                     |       | 11/2020-02/2021 |             |              |     |
| Wang,<br>Wanxin <sup>S97</sup>     | GAD-7             | CES-D                | 7th and 10th graders from six middle schools and four high schools in Guangzhou                                                                     | China | 10-12/2019      | 1,790-1,831 | 14 (1)       | 50% |
|                                    |                   |                      |                                                                                                                                                     |       | 10-12/2020      |             |              |     |
| Widnall <sup>S98</sup>             | HADS-A            |                      | Secondary students aged 13 to 15 years in South West England                                                                                        | UK    | 10/2019         | 603         | Range: 13-15 | NR  |
|                                    |                   |                      |                                                                                                                                                     |       | 05/2020         |             |              |     |
| Wong, R <sup>S99</sup>             | DASS-21 - Anxiety | DASS-21 - Depression | Young adolescents from the Healthy Kids cohort                                                                                                      | China | 04-08/2019      | 233         | 12 (0)       | 61% |
|                                    |                   |                      |                                                                                                                                                     |       | 02/2020         |             |              |     |
| Yang,<br>Zhengqian <sup>S100</sup> |                   | CES-D                | Adolescents from three public junior high schools in Heilongjiang, who were part of the Life History Strategies and Adolescents' Adaptation Project | China | 11/2019         | 1,125       | 14 (1)       | 51% |
|                                    |                   |                      |                                                                                                                                                     |       | 08/2020         |             |              |     |
| Zhang <sup>S101</sup>              | HBQ               | MFQ                  | Students in grades 4 through 8 enrolled in an ongoing longitudinal cohort                                                                           | China | 11/2019         | 1,241       | 13 (1)       | 59% |
|                                    |                   |                      |                                                                                                                                                     |       | 05/2020         |             |              |     |

---

### Parents

---

|                           |                                       |       |                                                                                                                  |                 |                              |     |        |     |
|---------------------------|---------------------------------------|-------|------------------------------------------------------------------------------------------------------------------|-----------------|------------------------------|-----|--------|-----|
| Achterberg <sup>S72</sup> | BSI                                   |       | Parents of children aged 10 to 13 years who enrolled in a longitudinal twin study in 2015-2016                   | The Netherlands | 01-11/2019                   | 106 | 45 (5) | 93% |
|                           |                                       |       |                                                                                                                  |                 | 04-05/2020                   |     |        |     |
| Adesogan <sup>S102</sup>  |                                       | CES-D | Black men and women in the rural South who took part in the Protecting Strong African American Families project. | USA             | NR/2018-03/2020 <sup>h</sup> | 329 | 43 (8) | 58% |
|                           |                                       |       |                                                                                                                  |                 | 06-09/2020                   |     |        |     |
| Bosch <sup>S76</sup>      | SDQ - Emotion Symptoms<br>SDQ - Total |       | Parents with children aged 6 to 17 from the INSchool study                                                       | Spain           | NR/2019                      | 669 | 13 (3) | 48% |
|                           |                                       |       |                                                                                                                  |                 | 05-06/2020                   |     |        |     |
| Frank <sup>S103</sup>     |                                       | PHQ-9 | Physician parents enrolled in the Intern Health Study                                                            | USA             | 08/2018                      | 180 | 40 (4) | 53% |

|                               |     |       |       |                                                                                                       |            |                            |       |         |      |
|-------------------------------|-----|-------|-------|-------------------------------------------------------------------------------------------------------|------------|----------------------------|-------|---------|------|
| Gagné <sup>S104</sup>         | K10 |       |       | Parents with at least one child aged 5 to 17 years previously enrolled in a parenting support program | Canada     | 08/2020<br>03-05/2019      | 127   | NR      | 80%  |
| Loret de Mola <sup>S105</sup> |     | GAD-7 | EPDS  | Mothers from the Rio Grande birth cohort                                                              | Brazil     | 05-07/2020<br>01-12/2019   | 1,136 | 28 (7)  | 100% |
| Pitchik <sup>S106</sup>       |     |       | CES-D | Primary caregivers of children 6 to 24 months with no physical or cognitive disabilities              | Bangladesh | 05-07/2020<br>05-06/2019   | 517   | NR (NR) | 100% |
| Rivera <sup>S107</sup>        |     |       | EDS   | Women enrolled in the Programming Research in Obesity, Growth, Environment and Social Stressors study | Mexico     | 07-09/2020<br>NR/2018-2019 | 466   | 39 (6)  | 100% |
| Thompson <sup>S108</sup>      |     | GAD-7 | CES-D | First-time mothers of young toddlers living in low-income contexts                                    | USA        | 05-11/2020<br>NR/2018-2019 | 147   | 27 (6)  | 100% |

---

**People with Pre-existing Medical Conditions**

---

|                           |                                |        |         |                                                                                                         |                 |                                         |             |         |     |
|---------------------------|--------------------------------|--------|---------|---------------------------------------------------------------------------------------------------------|-----------------|-----------------------------------------|-------------|---------|-----|
| Becker <sup>S109</sup>    | SF-36 (role emotional)         |        | CESD-10 | Individuals with multiple sclerosis                                                                     | USA             | 03/2019                                 | 119-121     | 69 (8)  | 86% |
| Bonenkamp <sup>S110</sup> | SF-12 Mental Component Summary |        |         | Dialysis patients from the ongoing Dutch nocturnal and home dialysis Study To Improve Clinical Outcomes | The Netherlands | 03/2020<br>08/2019                      | 177         | 65 (12) | 37% |
| Chao <sup>S111</sup>      |                                |        | PHQ-8   | Older adults with Type 2 diabetes who were enrolled in Look AHEAD.                                      | USA             | 07/2020<br>02/2018-02/2020 <sup>h</sup> | 2,679-2,829 | 76 (6)  | 63% |
| Chiu <sup>S112</sup>      | SPANE-P                        | HADS-A | HADS-D  | Individuals with Multiple Sclerosis                                                                     | USA             | 07-12/2020<br>10/2018                   | 133         | 49 (12) | 86% |

|                                |                                      |                |                     |                                                                                                                            |                         |                                                                      |       |                            |     |
|--------------------------------|--------------------------------------|----------------|---------------------|----------------------------------------------------------------------------------------------------------------------------|-------------------------|----------------------------------------------------------------------|-------|----------------------------|-----|
|                                | SPANE-N                              |                |                     |                                                                                                                            |                         | 09/2020                                                              |       |                            |     |
|                                | EORTC QLQ-C30-Global quality of life |                |                     |                                                                                                                            |                         | 01/2019-01/2020 <sup>h</sup>                                         |       |                            |     |
| Derksen <sup>S113</sup>        |                                      | HADS-A         | HADS-D              | Patients included in the nationwide Prospective Dutch Colorectal Cancer cohort                                             | The Netherlands         |                                                                      | 2,176 | 67 (10)                    | 37% |
|                                | EORTC QLQ-C30-Emotional functioning  |                |                     |                                                                                                                            |                         | 04-06/2020                                                           |       |                            |     |
| Dunlop-Thomas <sup>S114</sup>  | PROMIS - Global mental health        |                | PROMIS - Depression | Patients with systemic lupus erythematosus who were part of the Georgians Organized Against Lupus (GOAL) cohort            | USA                     | NR/2017-2019 <sup>g</sup>                                            | 852   | 48 (NR)                    | 94% |
|                                |                                      |                |                     |                                                                                                                            |                         | NR/2020-2021                                                         |       |                            |     |
| Fujiwara <sup>S115</sup>       | EQ-5D-5L                             | HADS-A         | HADS-D              | Outpatients with chronic pain undergoing treatment                                                                         | Japan                   | 07-09/2019                                                           | 245   | 73 (12)                    | 55% |
|                                |                                      |                |                     |                                                                                                                            |                         | 07-09/2020                                                           |       |                            |     |
| García-Rudolph <sup>S116</sup> | WHOQOL-BREF                          | HADS-A         | HADS-D              | Adult community residents with diagnosed spinal cord injury                                                                | Spain                   | NR                                                                   | 175   | 55 (14)                    | 30% |
|                                |                                      |                |                     |                                                                                                                            |                         | 11/2020                                                              |       |                            |     |
| Gul <sup>S117</sup>            |                                      |                | BDI                 | Patients with epilepsy .                                                                                                   | Turkey                  | 10-11/2019                                                           | 116   | Median: 33<br>Range: 18-65 | 56% |
|                                |                                      |                |                     |                                                                                                                            |                         | 06-07/2020                                                           |       |                            |     |
| Henry <sup>S118</sup>          |                                      | PROMIS Anxiety | PHQ-8               | People with systemic sclerosis enrolled in an ongoing longitudinal cohort                                                  | Canada, France, UK, USA | 07-12/2019                                                           | 435   | 57 (13)                    | 89% |
|                                |                                      |                |                     |                                                                                                                            |                         | 04/2020 <sup>i</sup><br>12/2020 <sup>j</sup><br>03/2021 <sup>i</sup> |       |                            |     |
| Johnstone <sup>S119</sup>      | QOLS                                 | HADS-A         | HADS-D              | Individuals with rheumatoid arthritis or ankylosing spondylitis from the Patient Opinion Real-Time Anonymous Liaison study | New Zealand             | NR/2018                                                              | 104   | 57 (12)                    | 74% |
|                                |                                      |                |                     |                                                                                                                            |                         | 07-09/2020                                                           |       |                            |     |
| Katz, P <sup>S120</sup>        |                                      | GAD-2          | PHQ-2               | People with rheumatic diseases enrolled in a longitudinal registry (National Databank for Rheumatic Diseases)              | USA                     | NR/2019                                                              | 1,504 | 66 (11)                    | 86% |
|                                |                                      |                |                     |                                                                                                                            |                         | 03-06/2020                                                           |       |                            |     |
| Liang <sup>S121</sup>          |                                      | ZSAS           | ZSDS                | Patients with maintenance hemodialysis under medical quarantine in a single hospital                                       | China                   | 12/2019                                                              | 114   | 59 (16)                    | 32% |

|                          |                      |                |                   |                                                                                                  |                        |                              |     |                          |      |
|--------------------------|----------------------|----------------|-------------------|--------------------------------------------------------------------------------------------------|------------------------|------------------------------|-----|--------------------------|------|
| Lim <sup>S122</sup>      | PROMIS Mental Health | PROMIS Anxiety | PROMIS Depression | People with systemic lupus erythematosus                                                         | USA                    | 02-03/2020                   | 316 | 47 (13)                  | 93%  |
|                          |                      |                |                   |                                                                                                  |                        | NR/2018                      |     |                          |      |
| Möller <sup>S123</sup>   | DASS-21              |                |                   | Adults with coeliac disease                                                                      | Australia, New Zealand | 04/2020                      | 674 | 57 (14)                  | 83%  |
|                          |                      |                |                   |                                                                                                  |                        | 08-10/2019                   |     |                          |      |
| Park <sup>S124</sup>     | EQ-5D-3L             | HADS-A         | HADS-D            | Adults with pulmonary arterial hypertension who were part of the PEPPAH-study                    | Germany                | 05-07/2020                   | 152 | Median: 58<br>IQR: 49-67 | 73%  |
|                          |                      |                |                   |                                                                                                  |                        | 09/2019–02/2020 <sup>h</sup> |     |                          |      |
| Rentscher <sup>S29</sup> |                      | STAI-State     | CES-D             | Women aged 60 years and older who were nonmetastatic breast cancer survivors                     | USA                    | 05-08/2020                   | 262 | 68 (5)                   | 100% |
|                          |                      |                |                   |                                                                                                  |                        | 02-06/2019                   |     |                          |      |
| Sacre <sup>S125</sup>    | PAID                 | GAD-7          | PHQ-8             | Adults with type 2 diabetes from the PREDICT cohort study                                        | Australia              | 05-09/2020                   | 450 | 66 (9)                   | 31%  |
|                          |                      |                |                   |                                                                                                  |                        | NR/2018-2019                 |     |                          |      |
| Sbragia <sup>S126</sup>  | HADS                 | HADS-A         | HADS-D            | Patients with multiple sclerosis                                                                 | Italy                  | 05-06/2020                   | 106 | 43 (11)                  | 70%  |
|                          |                      |                |                   |                                                                                                  |                        | 01/2019                      |     |                          |      |
| Ubara <sup>S127</sup>    |                      |                | PHQ-9             | Patients from a sleep outpatient clinic from a single hospital                                   | Japan                  | 05/2020                      | 164 | 64 (14)                  | 13%  |
|                          |                      |                |                   |                                                                                                  |                        | 04-07/2019                   |     |                          |      |
| Uchida <sup>S128</sup>   |                      |                | CES-D-SF          | Hemodialysis patients                                                                            | Japan                  | 05/2020                      | 142 | 66 (11)                  | 42%  |
|                          |                      |                |                   |                                                                                                  |                        | 04/2019-03/2020 <sup>h</sup> |     |                          |      |
| Wong, S <sup>S35</sup>   |                      | GAD-7          | PHQ-9             | Adults aged ≥ 60 years with ≥ 2 chronic medical conditions recruited from 4 primary care clinics | Hong Kong, China       | 07/2020-03/2021              | 583 | 71 (6)                   | 73%  |
|                          |                      |                |                   |                                                                                                  |                        | 04/2018-03/2019              |     |                          |      |
|                          |                      |                |                   |                                                                                                  |                        | 03-04/2020                   |     |                          |      |

03-06/2020

**People with Pre-existing Mental Health Conditions**

|                          |                   |                      |                                                                                                                                                              |                 |                                            |                  |                                                                                                                    |     |
|--------------------------|-------------------|----------------------|--------------------------------------------------------------------------------------------------------------------------------------------------------------|-----------------|--------------------------------------------|------------------|--------------------------------------------------------------------------------------------------------------------|-----|
| Gentile <sup>S129</sup>  | HAM-A             | HAM-D                | Psychiatric outpatients based in a large area of central-southern Italy and Department of Psychiatry of University of Asuncion, Paraguay.                    | Italy, Paraguay | 10-12/2019<br>03-04/2020                   | 110 <sup>k</sup> | 39(14)                                                                                                             | 55% |
| Huong <sup>S130</sup>    | BSRS-5            |                      | Patients with treatment-refractory depression referred by two psychiatrists in the study hospitals                                                           | Taiwan          | 01-12/2018<br>01-05/2020                   | 114              | 57 (14)                                                                                                            | 71% |
| Swerdlow <sup>S131</sup> | MASQ-30 - Anxiety | MASQ-30 - Depression | A community sample of adults with pre-existing mental health concerns                                                                                        | USA             | NR/2018-04/2020 <sup>h</sup><br>04-06/2020 | 144              | 29 (NR)                                                                                                            | 74% |
| Young <sup>S132</sup>    | GAD-7             | PHQ-9                | UK residents aged $\geq 16$ years with current or history of depressive or anxiety disorder diagnosis from the Genetic Links to Anxiety and Depression study | UK              | 09/2018-02/2020 <sup>h</sup><br>04-09/2020 | 12,653           | Range (%):<br>16-18 (3); 19-25 (12); 26-35 (23); 36-45 (19); 46-55 (22); 56-65 (15); 66-70 (3); 71-75 (2); 76+ (1) | 80% |

**Medical Staff**

|                             |       |       |                                                       |       |                          |     |                          |     |
|-----------------------------|-------|-------|-------------------------------------------------------|-------|--------------------------|-----|--------------------------|-----|
| Frank <sup>S103</sup>       |       | PHQ-9 | Physician parents enrolled in the Intern Health Study | USA   | 08/2018<br>08/2020       | 180 | 40 (4)                   | 53% |
| Li, Weidong <sup>S133</sup> | GAD-7 | PHQ-9 | Training physicians from 12 Shanghai hospitals        | China | 10-11/2019<br>01-02/2020 | 385 | Median: 25<br>IQR: 23-28 | 64% |

**Sexual or Gender Minority Individuals**

|                          |       |       |                                                        |           |                    |       |         |                  |
|--------------------------|-------|-------|--------------------------------------------------------|-----------|--------------------|-------|---------|------------------|
| Bavinton <sup>S134</sup> | GAD-7 | PHQ-9 | Gay and bisexual men enrolled in a longitudinal cohort | Australia | NR/2019<br>04/2020 | 681   | NR      | 0%               |
| Flentje <sup>S135</sup>  | GAD-7 | PHQ-9 |                                                        | USA       | 06/2019            | 2,288 | 37 (15) | 63% <sup>l</sup> |

|                          |       |       |                                                                                           |        |                 |     |                                                      |     |
|--------------------------|-------|-------|-------------------------------------------------------------------------------------------|--------|-----------------|-----|------------------------------------------------------|-----|
|                          |       |       | Convenience sample of sexual and gender minority adults enrolled in a longitudinal cohort |        | 03-04/2020      |     |                                                      |     |
| Ghabrial <sup>S136</sup> | OASIS | CES-D | Trans and non-binary individuals who were part of the Trans PULSE Canada (TPC) study      | Canada | NR/2019         | 780 | 33 (12)                                              | 25% |
|                          |       |       |                                                                                           |        | 09-10/2020      |     |                                                      |     |
| <b>Immigrants</b>        |       |       |                                                                                           |        |                 |     |                                                      |     |
|                          |       |       |                                                                                           |        | 04/2018-NR/2019 |     |                                                      |     |
| Gosselin <sup>S137</sup> |       | PHQ-9 | Immigrants from sub-Saharan Africa                                                        | France |                 | 100 | Range (%):<br>19-29 (34);<br>30-39 (39);<br>40+ (27) | 21% |
|                          |       |       |                                                                                           |        | 06/2020         |     |                                                      |     |

BDI-II = Beck Depression Inventory (second edition); BJSQ = Brief Job Stress Questionnaire; BSI = Brief Symptom Inventory; BSRS = Brief-Symptom Rating Scale; CCAPS-62 = Counseling Center Assessment of Psychological Symptoms; CDI-S = Children's Depression Inventory-Short; CES-DC = Center for Epidemiologic Studies Depression Scale Children; CES-D(-R/10) = Center for Epidemiologic Studies Depression (- Revised/10); CIDI = The Composite International Diagnostic Interview; DASS-21 = Depression, Anxiety, and Stress Scale; DTOS = Distress Tolerance Scale; EDS = Edinburgh Depression Scale; EORTC QLQ-C30 = European Organization for the Research and Treatment of Cancer Quality of Life Questionnaire; EPDS = Edinburgh Postnatal Depression Scale; EQ-5D-5L = The 5-level European Quality of Life 5-dimensions version; GAD-7 = Generalized Anxiety Disorder; GAI-SF = Geriatric Anxiety Inventory - Short Form; GDS = Geriatric Depression Scale; GHQ = General Health Questionnaire; GSI = Global Severity Index; HADS-A/D = Hospital Anxiety and Depression Scale-Anxiety/Depression; HAI = Health Anxiety Inventory; HAM-A/D = Hamilton Anxiety/Depression Rating Scale; HBQ = MacArthur Health and Behavior Questionnaire; K6/10 = Kessler Psychological Distress Scale-6/10; MASQ = Mood and Anxiety Symptom Questionnaire; MDI = Major Depression Inventory; (S)MFQ = (Short) Mood and Feelings Questionnaire; MHI-5 = Mental Health Index-5; OASIS = Overall Anxiety Severity and Impairment Scale; PAID = Problem Areas in Diabetes scale; PANAS-PA/NA = Positive and Negative Affect Schedule – Positive Affect/Negative Affect; PERMA – PA/NA = Positive emotion, Engagement, Relationships, Meaning, and Accomplishment Profiler – Positive/Negative Affect; PHQ-2/4/8/9/A = Patient Health Questionnaire 2/4/8/9/Adolescents; PMH = Positive Mental Health Scale; PROMIS = Patient-Reported Outcomes Measurement Information System; PWBS = Psychological Well-being scale; QOLS = Quality of Life Scale; RCADS = Revised Children's Anxiety and Depression Scale; RPOMIS = Patient-Reported Outcomes Measurement Information System; RRQ = Reflection and Rumination Scale; SCAS = Spence Children's Anxiety Scale; SCL-90-R = Symptom Check List-90-Revised; SDQ = Strengths and Difficulties Questionnaire; SF-8/12/36(-MCS) = Short-Form-8/12/36 Health Survey (Mental Component Summary); SMGAD = Severity Measure for Generalized Anxiety Disorder; SPANE-P/N = Scale of Positive and Negative Experience-Positive/Negative; STAI = State-Trait Anxiety Inventory; STDS = State-Trait Depression Scale; SWLS = Satisfaction with Life Scale; UK = United Kingdom; USA = United States of America; (S)WEMWBS = (Short) Warwick Edinburgh Mental Wellbeing Scale; WHO-5-J = World Health Organization (Five) Wellbeing Index; WHOQOL-BREF/AGE = World Health Organization Quality of Life Questionnaire for Older adults; ZSAS = Zung Self-rating Anxiety Scale; ZSDS = Zung Self-rating Depression Scale.

<sup>a</sup>Studies with data on females or women and males or men are not listed separately because they represent subgroup data from other studies in the table. <sup>b</sup>Based on 671 participants with data during COVID-19. <sup>c</sup>Analyses compared COVID-19 symptom levels to preceding trends across multiple assessments. <sup>d</sup>Number included in fixed effects regression analysis from where the majority of data were extracted. <sup>e</sup>Age groups reported for Daly<sup>S12</sup>; for Pierce,<sup>S11</sup> 16-24 = 9%, 25-34 = 11%, 35-44 = 16%, 45-54 = 20%, 55-69 = 29%, 70+ = 15%. <sup>f</sup>Based on van der Velden.<sup>S17</sup> <sup>g</sup>Included because estimated that over 80% of pre-COVID-19 data would have been collected after January 01, 2018. <sup>h</sup>Included because estimated that over 80% of pre-COVID-19 data would have been collected by December 31, 2019. <sup>i</sup>Recruited participants from the same longitudinal cohort. Of cohort participants who completed pre-COVID-19 assessments, 946 agreed to be contacted again. 214<sup>S63</sup> and 255<sup>S64</sup> completed assessments during early 2020 and later 2020, but the authors did not report how many participants overlapped between COVID-19 assessments in 2020. <sup>j</sup>Mental health assessments conducted at 15 time points during COVID-19. We have reported first (April 2020), last in 2020 (December 2020) and last in 2021 (March 2021). <sup>k</sup>N = 60 from Italy and 50 from Paraguay (results not reported by country). <sup>l</sup>Based on female sex assigned at birth; 12 gender categories listed in study.

## Supplementary Table 2. Risk of Bias and Adequacy of Methods and Reporting

| Author                              | Appropriate sample frame | Appropriate participant recruitment | Adequate sample size | Participants and setting adequately described | Adequate response rate and data analysis with sufficient coverage | Valid methods for identification of outcome variable | Standard, reliable outcome measurement | Appropriate statistical analysis | Adequate follow-up response rate/ appropriate management of low response rate |
|-------------------------------------|--------------------------|-------------------------------------|----------------------|-----------------------------------------------|-------------------------------------------------------------------|------------------------------------------------------|----------------------------------------|----------------------------------|-------------------------------------------------------------------------------|
| <b>General Population</b>           |                          |                                     |                      |                                               |                                                                   |                                                      |                                        |                                  |                                                                               |
| Bulbulia <sup>S1</sup>              | Yes                      | Yes                                 | Yes                  | Yes                                           | No                                                                | Yes                                                  | Yes                                    | Yes                              | No                                                                            |
| Castellini <sup>S2</sup>            | Unclear                  | No                                  | Unclear              | Yes                                           | Unclear                                                           | Yes                                                  | Yes                                    | Yes                              | Yes                                                                           |
| Chan <sup>S3</sup>                  | No                       | No                                  | Yes                  | No                                            | Unclear                                                           | Yes                                                  | Yes                                    | Yes                              | Unclear                                                                       |
| Finucane <sup>S4</sup>              | No                       | Yes                                 | Yes                  | Yes                                           | Unclear                                                           | Yes                                                  | Unclear                                | Yes                              | No                                                                            |
| Ge <sup>S5</sup>                    | No                       | No                                  | Yes                  | No                                            | Unclear                                                           | Yes                                                  | Yes                                    | Yes                              | Unclear                                                                       |
| Haliwa <sup>S6</sup>                | No                       | No                                  | Unclear              | Yes                                           | Unclear                                                           | Yes                                                  | Yes                                    | Yes                              | No                                                                            |
| Kanbur <sup>S7</sup>                | No                       | Unclear                             | Yes                  | No                                            | Unclear                                                           | Yes                                                  | Unclear                                | No                               | Unclear                                                                       |
| Katz, B <sup>S8</sup>               | No                       | No                                  | Yes                  | Yes                                           | Unclear                                                           | Yes                                                  | Yes                                    | Yes                              | Unclear                                                                       |
| Latikka <sup>S9</sup>               | Unclear                  | Unclear                             | Yes                  | Yes                                           | No                                                                | Yes                                                  | Yes                                    | Yes                              | Yes                                                                           |
| Megias-Robles <sup>S10</sup>        | Unclear                  | No                                  | Unclear              | No                                            | Unclear                                                           | Yes                                                  | Yes                                    | Yes                              | No                                                                            |
| Pierce <sup>S11</sup>               | Yes                      | Yes                                 | Yes                  | Yes                                           | Unclear                                                           | Yes                                                  | Yes                                    | Yes                              | Unclear                                                                       |
| Daly <sup>S12</sup>                 | Yes                      | Yes                                 | Yes                  | Yes                                           | Unclear                                                           | Yes                                                  | Yes                                    | Yes                              | No                                                                            |
| Shimura <sup>S13</sup>              | No                       | Unclear                             | Yes                  | No                                            | Unclear                                                           | Yes                                                  | Yes                                    | Yes                              | Yes                                                                           |
| Soltanzadeh <sup>S14</sup>          | No                       | Yes                                 | Yes                  | Yes                                           | Yes                                                               | Yes                                                  | Unclear                                | Yes                              | Yes                                                                           |
| Thygesen <sup>S15</sup>             | Yes                      | Unclear                             | Yes                  | Yes                                           | No                                                                | Yes                                                  | Unclear                                | Yes                              | Unclear                                                                       |
| van der Velden, 2020 <sup>S16</sup> | Yes                      | Yes                                 | Yes                  | Yes                                           | Yes                                                               | Yes                                                  | Yes                                    | Yes                              | Yes                                                                           |
| van der Velden, 2021 <sup>S17</sup> | Yes                      | Yes                                 | Yes                  | Yes                                           | Yes                                                               | Yes                                                  | Yes                                    | Yes                              | Yes                                                                           |
| Wanberg <sup>S18</sup>              | Yes                      | Yes                                 | Yes                  | Yes                                           | Unclear                                                           | Yes                                                  | Unclear                                | Yes                              | No                                                                            |
| <b>Older Adults</b>                 |                          |                                     |                      |                                               |                                                                   |                                                      |                                        |                                  |                                                                               |
| Bartlett <sup>S19</sup>             | Yes                      | No                                  | Yes                  | Yes                                           | Unclear                                                           | Yes                                                  | Yes                                    | Yes                              | No                                                                            |

|                                  |         |         |         |     |         |     |     |     |         |
|----------------------------------|---------|---------|---------|-----|---------|-----|-----|-----|---------|
| Briggs <sup>S20</sup>            | Yes     | Yes     | Yes     | Yes | Unclear | Yes | Yes | Yes | No      |
| Creese <sup>S21</sup>            | Yes     | No      | Yes     | Yes | No      | Yes | Yes | Yes | Yes     |
| Eliassen <sup>S22</sup>          | No      | Yes     | Yes     | Yes | No      | Yes | Yes | Yes | No      |
| Herrera <sup>S23</sup>           | Yes     | Yes     | Yes     | Yes | Unclear | Yes | No  | No  | No      |
| Kera <sup>S24</sup>              | No      | Unclear | Yes     | No  | Unclear | Yes | Yes | Yes | No      |
| Kivi <sup>S25</sup>              | Yes     | Unclear | Yes     | Yes | No      | Yes | Yes | Yes | No      |
| Lee <sup>S26</sup>               | Yes     | Yes     | Yes     | Yes | Unclear | Yes | Yes | No  | Unclear |
| Martinez <sup>S27</sup>          | No      | Unclear | Unclear | Yes | Unclear | Yes | Yes | Yes | Unclear |
| Okely <sup>S28</sup>             | No      | No      | Unclear | Yes | No      | Yes | Yes | Yes | No      |
| Rentscher <sup>S29</sup>         | Yes     | Unclear | Yes     | Yes | Unclear | Yes | No  | Yes | Yes     |
| Sardella <sup>S30</sup>          | No      | No      | Unclear | Yes | Unclear | Yes | Yes | Yes | No      |
| Siew <sup>S31</sup>              | Yes     | No      | Yes     | Yes | Unclear | Yes | No  | Yes | No      |
| van den Besselaar <sup>S32</sup> | Unclear | No      | Yes     | Yes | Unclear | Yes | No  | Yes | Unclear |
| van Tilburg <sup>S33</sup>       | Yes     | Yes     | Yes     | Yes | Yes     | Yes | Yes | Yes | Yes     |
| Wang, Yi <sup>S34</sup>          | Yes     | Yes     | Yes     | Yes | Unclear | Yes | Yes | Yes | Yes     |
| Wong, S <sup>S35</sup>           | No      | Unclear | Yes     | Yes | Unclear | Yes | Yes | Yes | Yes     |
| Yu <sup>S36</sup>                | Yes     | No      | Yes     | Yes | Unclear | Yes | Yes | Yes | No      |

#### Young Adults

|                               |         |         |     |     |         |     |     |     |         |
|-------------------------------|---------|---------|-----|-----|---------|-----|-----|-----|---------|
| Islam <sup>S37</sup>          | No      | Yes     | Yes | Yes | No      | Yes | Yes | Yes | No      |
| Marmet <sup>S38</sup>         | Yes     | Yes     | Yes | Yes | Unclear | Yes | Yes | Yes | No      |
| Rimfeld <sup>S39</sup>        | Yes     | Unclear | Yes | Yes | Unclear | Yes | Yes | Yes | Unclear |
| Romm <sup>S40</sup>           | No      | No      | Yes | Yes | Unclear | Yes | Yes | Yes | Unclear |
| Tanioka <sup>S41</sup>        | No      | Unclear | Yes | Yes | Unclear | Yes | Yes | Yes | No      |
| Villadsen <sup>S42</sup>      | Unclear | Unclear | Yes | Yes | Unclear | Yes | Yes | Yes | No      |
| Watkins-Martin <sup>S43</sup> | Yes     | Unclear | Yes | Yes | Unclear | Yes | Yes | Yes | No      |

#### University Students

|                                          |         |         |         |     |         |     |         |     |         |
|------------------------------------------|---------|---------|---------|-----|---------|-----|---------|-----|---------|
| Conceição <sup>S44</sup>                 | No      | Yes     | Yes     | Yes | Unclear | Yes | Unclear | Yes | No      |
| Dong <sup>S45</sup>                      | No      | No      | Yes     | Yes | Yes     | Yes | Yes     | Yes | Yes     |
| Elmer <sup>S46</sup>                     | No      | Yes     | Yes     | Yes | Unclear | Yes | Yes     | Yes | Unclear |
| Evans <sup>S47</sup>                     | No      | Unclear | Yes     | Yes | Unclear | Yes | No      | Yes | Yes     |
| Fuller-Rowell <sup>S48</sup>             | No      | Unclear | Yes     | Yes | Unclear | Yes | Unclear | Yes | Yes     |
| Gelezelyte <sup>S49</sup>                | No      | Unclear | Yes     | Yes | No      | Yes | Yes     | Yes | No      |
| Gopalan <sup>S50</sup>                   | No      | Unclear | Yes     | Yes | Unclear | Yes | Yes     | Yes | No      |
| Hamza <sup>S51</sup>                     | No      | Unclear | Yes     | Yes | Unclear | Yes | Yes     | Yes | Yes     |
| He <sup>S52</sup>                        | Unclear | Unclear | Yes     | Yes | Unclear | Yes | Unclear | Yes | Yes     |
| Koelen <sup>S53</sup>                    | No      | Yes     | Yes     | Yes | Unclear | Yes | Yes     | Yes | No      |
| Li, H <sup>S54</sup>                     | No      | Unclear | Yes     | Yes | Unclear | Yes | Yes     | Yes | Yes     |
| Li, R <sup>S55</sup>                     | No      | Yes     | Yes     | No  | Unclear | Yes | Yes     | Yes | Yes     |
| Li, Wendy Wen <sup>S56</sup>             | No      | No      | Unclear | Yes | No      | Yes | Yes     | Yes | Yes     |
| Liu <sup>S57</sup>                       | No      | Yes     | Yes     | Yes | Yes     | Yes | Yes     | Yes | Yes     |
| Lu <sup>S58</sup>                        | Unclear | Yes     | Yes     | Yes | Unclear | Yes | Unclear | Yes | Unclear |
| Mauer <sup>S59</sup>                     | Yes     | No      | Yes     | Yes | Unclear | Yes | Yes     | Yes | No      |
| Mehus <sup>S60</sup>                     | No      | Yes     | Yes     | Yes | Unclear | Yes | Yes     | Yes | Unclear |
| Ratner <sup>S61</sup>                    | No      | Unclear | Unclear | Yes | Unclear | Yes | Yes     | Yes | No      |
| Saraswathi <sup>S62</sup>                | No      | Yes     | Unclear | Yes | Yes     | Yes | Yes     | Yes | Yes     |
| Savage, 2020 <sup>S63</sup>              | No      | Yes     | Yes     | Yes | No      | Yes | Yes     | Yes | No      |
| Savage, 2021 <sup>S64</sup>              | Unclear | Unclear | Yes     | Yes | No      | Yes | Yes     | No  | No      |
| Shiratori <sup>S65</sup>                 | No      | Unclear | Yes     | Yes | Unclear | Yes | Yes     | Yes | No      |
| Truskauskaitė-Kuneviciene <sup>S66</sup> | No      | Unclear | Yes     | Yes | Unclear | Yes | Yes     | Yes | No      |
| Voltmer <sup>S67</sup>                   | No      | No      | Yes     | Yes | No      | Yes | Yes     | Yes | Unclear |
| Wang, Yitao <sup>S68</sup>               | No      | Yes     | Yes     | No  | Unclear | Yes | Yes     | Yes | Yes     |
| Yang, X <sup>S69</sup>                   | No      | Unclear | Unclear | No  | Unclear | Yes | Yes     | Yes | Unclear |
| Yang, Ziyao <sup>S70</sup>               | No      | Unclear | Yes     | Yes | Unclear | Yes | Unclear | Yes | Unclear |

|                                 |         |         |         |     |         |     |         |     |         |
|---------------------------------|---------|---------|---------|-----|---------|-----|---------|-----|---------|
| Zimmerman <sup>S71</sup>        | No      | No      | Yes     | Yes | Unclear | Yes | Yes     | Yes | No      |
| <b>Children and Adolescents</b> |         |         |         |     |         |     |         |     |         |
| Achterberg <sup>S72,a</sup>     | No      | No      | Unclear | Yes | Unclear | Yes | No      | Yes | No      |
| Adachi <sup>S73</sup>           | No      | Unclear | Yes     | Yes | Yes     | Yes | Yes     | Yes | Yes     |
| Bado <sup>S74</sup>             | No      | No      | Yes     | Yes | Unclear | Yes | Unclear | Yes | Unclear |
| Bernasco <sup>S75</sup>         | No      | Unclear | Yes     | Yes | Unclear | Yes | Yes     | Yes | Unclear |
| Bosch <sup>S76</sup>            | Yes     | Unclear | Yes     | Yes | No      | Yes | Yes     | Yes | No      |
| Charmaraman <sup>S77</sup>      | No      | Unclear | Yes     | Yes | Unclear | Yes | Unclear | Yes | No      |
| Chen, I-H <sup>S78</sup>        | No      | No      | Yes     | Yes | Yes     | Yes | Yes     | Yes | Yes     |
| Chen, C-Y <sup>S79</sup>        | No      | Unclear | Yes     | No  | Yes     | Yes | Yes     | Yes | No      |
| Daniunaite <sup>S80</sup>       | No      | Yes     | Yes     | Yes | Unclear | Yes | Yes     | Yes | Yes     |
| Ezpeleta <sup>S81</sup>         | No      | No      | Unclear | Yes | No      | Yes | No      | Yes | Unclear |
| Fujihara <sup>S82</sup>         | No      | Unclear | Yes     | No  | No      | Yes | Yes     | Yes | Unclear |
| Hu <sup>S83</sup>               | Unclear | Unclear | Yes     | Yes | Unclear | Yes | Yes     | Yes | Unclear |
| Knowles <sup>S84</sup>          | Unclear | Unclear | Yes     | Yes | No      | Yes | Yes     | Yes | Unclear |
| Li, Y <sup>S85</sup>            | No      | Unclear | Yes     | Yes | Unclear | Yes | Yes     | Yes | Yes     |
| Liao <sup>S86</sup>             | No      | Yes     | Yes     | Yes | Unclear | Yes | Unclear | Yes | Yes     |
| Magson <sup>S87</sup>           | No      | Unclear | Yes     | Yes | Unclear | Yes | Yes     | Yes | No      |
| Mastorci <sup>S88</sup>         | No      | Yes     | Yes     | Yes | Unclear | Yes | Yes     | Yes | No      |
| Meireles <sup>S89</sup>         | No      | Unclear | Yes     | Yes | Unclear | Yes | Yes     | Yes | Unclear |
| Naumann <sup>S90</sup>          | Yes     | Unclear | Yes     | Yes | Unclear | Yes | Yes     | Yes | No      |
| Paizan <sup>S91</sup>           | No      | No      | Yes     | Yes | Unclear | Yes | Yes     | Yes | Unclear |
| Polack <sup>S92</sup>           | No      | No      | Unclear | No  | Unclear | Yes | Yes     | Yes | Yes     |
| Rau <sup>S93</sup>              | No      | Unclear | Yes     | Yes | No      | Yes | Yes     | Yes | No      |
| Shoshani <sup>S94</sup>         | No      | Unclear | Yes     | Yes | Unclear | Yes | Yes     | Yes | Yes     |
| Teng <sup>S95</sup>             | No      | Yes     | Yes     | Yes | Unclear | Yes | Yes     | Yes | Yes     |
| Vira <sup>S96</sup>             | Unclear | Unclear | Yes     | Yes | Unclear | Yes | No      | Yes | Unclear |

|                                 |         |         |     |     |         |     |         |     |         |
|---------------------------------|---------|---------|-----|-----|---------|-----|---------|-----|---------|
| Wang, Wanxin <sup>S97</sup>     | No      | Yes     | Yes | Yes | Yes     | Yes | Unclear | Yes | Yes     |
| Widnall <sup>S98</sup>          | No      | Unclear | Yes | No  | Unclear | Yes | Unclear | Yes | Unclear |
| Wong, R <sup>S99</sup>          | Unclear | Unclear | Yes | Yes | Unclear | Yes | Yes     | Yes | Unclear |
| Yang, Zhengqian <sup>S100</sup> | No      | Unclear | Yes | Yes | Unclear | Yes | Yes     | Yes | Unclear |
| Zhang <sup>S101</sup>           | No      | No      | Yes | Yes | Yes     | Yes | Yes     | Yes | Yes     |

#### Parents

|                               |         |         |         |     |         |     |         |     |         |
|-------------------------------|---------|---------|---------|-----|---------|-----|---------|-----|---------|
| Achterberg <sup>S72,a</sup>   | No      | No      | Unclear | Yes | Unclear | Yes | Yes     | Yes | No      |
| Adesogan <sup>S102</sup>      | No      | No      | Yes     | Yes | Unclear | Yes | No      | Yes | Yes     |
| Bosch <sup>S76</sup>          | Yes     | Unclear | Yes     | Yes | No      | Yes | Yes     | Yes | No      |
| Frank <sup>S103</sup>         | No      | Unclear | Unclear | Yes | Unclear | Yes | Yes     | Yes | Unclear |
| Gagné <sup>S104</sup>         | Unclear | Unclear | Unclear | No  | Unclear | Yes | Yes     | Yes | Yes     |
| Loret de Mola <sup>S105</sup> | No      | No      | Yes     | Yes | Unclear | Yes | Yes     | Yes | No      |
| Pitchik <sup>S106</sup>       | No      | Yes     | Yes     | No  | Unclear | Yes | Yes     | Yes | No      |
| Rivera <sup>S107</sup>        | No      | Unclear | Yes     | Yes | Unclear | Yes | Unclear | Yes | Unclear |
| Thompson <sup>S108</sup>      | Yes     | Unclear | Unclear | Yes | Unclear | Yes | Yes     | Yes | Yes     |

#### People with Pre-existing Medical Conditions

|                                |     |         |         |     |         |     |         |     |         |
|--------------------------------|-----|---------|---------|-----|---------|-----|---------|-----|---------|
| Becker <sup>S109</sup>         | Yes | No      | Yes     | Yes | No      | Yes | Yes     | Yes | Unclear |
| Bonenkamp <sup>S110</sup>      | Yes | Unclear | Yes     | Yes | Unclear | Yes | Unclear | Yes | Unclear |
| Chao <sup>S111</sup>           | No  | Unclear | Yes     | Yes | Unclear | Yes | Yes     | Yes | Unclear |
| Chiu <sup>S112</sup>           | No  | No      | Unclear | Yes | Unclear | Yes | Yes     | Yes | No      |
| Derksen <sup>S113</sup>        | Yes | Unclear | Yes     | Yes | Unclear | Yes | Unclear | Yes | No      |
| Dunlop-Thomas <sup>S114</sup>  | Yes | Unclear | Yes     | Yes | Unclear | Yes | Yes     | Yes | Unclear |
| Fujiwara <sup>S115</sup>       | No  | Unclear | Yes     | No  | Unclear | Yes | Unclear | Yes | Unclear |
| García-Rudolph <sup>S116</sup> | No  | No      | Unclear | Yes | Unclear | Yes | Unclear | Yes | Yes     |
| Gul <sup>S117</sup>            | No  | Unclear | Unclear | Yes | Unclear | Yes | Unclear | Yes | Unclear |
| Henry <sup>S118</sup>          | Yes | No      | Yes     | Yes | Unclear | Yes | Yes     | Yes | No      |

|                           |         |         |         |     |         |     |         |     |         |
|---------------------------|---------|---------|---------|-----|---------|-----|---------|-----|---------|
| Johnstone <sup>S119</sup> | No      | No      | Unclear | No  | Unclear | Yes | Yes     | Yes | Yes     |
| Katz, P <sup>S120</sup>   | Unclear | Unclear | Yes     | Yes | Unclear | Yes | Yes     | Yes | No      |
| Liang <sup>S121</sup>     | No      | No      | Unclear | Yes | Yes     | Yes | Yes     | Yes | Yes     |
| Lim <sup>S122</sup>       | Yes     | Unclear | Yes     | Yes | Unclear | Yes | Unclear | Yes | Unclear |
| Möller <sup>S123</sup>    | Yes     | No      | Yes     | Yes | No      | Yes | Yes     | Yes | Yes     |
| Park <sup>S124</sup>      | No      | No      | Unclear | No  | Unclear | Yes | Yes     | Yes | Yes     |
| Rentscher <sup>S29</sup>  | Yes     | Unclear | Yes     | Yes | Unclear | Yes | No      | Yes | Yes     |
| Sacre <sup>S125</sup>     | No      | No      | Yes     | Yes | Unclear | Yes | No      | Yes | Yes     |
| Sbragia <sup>S126</sup>   | No      | No      | Unclear | Yes | Unclear | Yes | Unclear | Yes | No      |
| Ubara <sup>S127</sup>     | No      | Unclear | Unclear | No  | Unclear | Yes | Yes     | Yes | Unclear |
| Uchida <sup>S128</sup>    | No      | Unclear | Unclear | Yes | Unclear | Yes | Unclear | Yes | Unclear |
| Wong, S <sup>S35</sup>    | No      | Unclear | Yes     | Yes | Unclear | Yes | Yes     | Yes | Yes     |

**People with Pre-existing Mental Health Conditions**

|                          |     |         |         |     |         |     |     |     |         |
|--------------------------|-----|---------|---------|-----|---------|-----|-----|-----|---------|
| Gentile <sup>S129</sup>  | Yes | Unclear | Unclear | Yes | Unclear | Yes | No  | Yes | Unclear |
| Huong <sup>S130</sup>    | No  | Unclear | Unclear | Yes | Unclear | Yes | Yes | Yes | Yes     |
| Swerdlow <sup>S131</sup> | Yes | No      | Unclear | Yes | Unclear | Yes | No  | Yes | Yes     |
| Young <sup>S132</sup>    | Yes | No      | Yes     | Yes | Unclear | Yes | Yes | Yes | No      |

**Medical Staff**

|                             |    |         |         |     |         |     |     |     |         |
|-----------------------------|----|---------|---------|-----|---------|-----|-----|-----|---------|
| Frank <sup>S103</sup>       | No | Unclear | Unclear | Yes | Unclear | Yes | Yes | Yes | Unclear |
| Li, Weidong <sup>S133</sup> | No | Unclear | Yes     | Yes | No      | Yes | Yes | Yes | No      |

**Sexual or Gender Minority Individuals**

|                          |         |         |     |     |         |     |     |     |         |
|--------------------------|---------|---------|-----|-----|---------|-----|-----|-----|---------|
| Bavinton <sup>S134</sup> | Yes     | Unclear | Yes | No  | Unclear | Yes | Yes | Yes | Unclear |
| Flentje <sup>S135</sup>  | Yes     | No      | Yes | Yes | Unclear | Yes | Yes | Yes | Unclear |
| Ghabrial <sup>S136</sup> | Unclear | Unclear | Yes | Yes | Unclear | Yes | No  | Yes | Unclear |

**Immigrants**

|                          |    |    |         |     |    |     |     |     |         |
|--------------------------|----|----|---------|-----|----|-----|-----|-----|---------|
| Gosselin <sup>S137</sup> | No | No | Unclear | Yes | No | Yes | Yes | Yes | Unclear |
|--------------------------|----|----|---------|-----|----|-----|-----|-----|---------|

<sup>a</sup>Achterberg et al. has two samples, parents, and their children, with independent risk of bias coding.

**Supplementary Table 3. Individual Study Results for General Mental Health**

| First Author Study Country                        | Pre- and Post-COVID-19 Data Collection | N   | Continuous Outcome Measure | Pre-COVID-19 Mean (SD) | Post-COVID-19 Mean (SD) | Mean (SD) Change <sup>a</sup> | Hedges' g Standardized Mean Difference (95% CI) | Dichotomous Outcome Measure | % pre-COVID-19 (95% CI) | % post-COVID-19 (95% CI) | % Change with 95% CI <sup>a</sup> |
|---------------------------------------------------|----------------------------------------|-----|----------------------------|------------------------|-------------------------|-------------------------------|-------------------------------------------------|-----------------------------|-------------------------|--------------------------|-----------------------------------|
| <b>General Population</b>                         |                                        |     |                            |                        |                         |                               |                                                 |                             |                         |                          |                                   |
| Bulbulia <sup>S1</sup><br>New Zealand             | NR/2018                                | 940 | K6                         | 5.42 (4.05)            | 5.65 (3.78)             | 0.23 (NR)                     | 0.06 (-0.03, 0.15)                              | -----                       | -----                   | -----                    | -----                             |
| Castellini <sup>S2</sup><br>Italy                 | 03-04/2020<br>12/2019                  | 130 | BSI-GSI                    | 0.51 (0.39)            | 0.46 (0.46)             | -0.05 (NR)                    | -0.12 (-0.36, 0.13)                             | -----                       | -----                   | -----                    | -----                             |
| Finucane <sup>S4</sup><br>USA                     | 04-05/2020<br>05/11-2018               | 416 | K6                         | 4.00 (4.40)            | 4.70 (4.60)             | 0.70 (NR)                     | 0.16 (0.02, 0.29)                               | K6 ≥ 13                     | 6.0 (4.1, 8.7)          | 6.5 (4.5, 9.2)           | 0.5 (-2.0, 3.0)                   |
| Kanbur <sup>S7</sup><br>Turkey                    | 06-09/2020<br>NR/2019                  | 400 | SCL-90-R                   | 0.36 (NR)              | 0.78 (NR)               | 0.42 (NR)                     | NR (NR)                                         | -----                       | -----                   | -----                    | -----                             |
| Katz, B <sup>S8</sup><br>Canada, Ireland, UK, USA | NR/2020<br>04/2019                     | 218 | RRQ                        | 42.46 (11.74)          | 41.66 (12.15)           | -0.80 (7.43)                  | -0.07 (-0.25, 0.12)                             | -----                       | -----                   | -----                    | -----                             |
|                                                   | 04/2020                                |     | DToS                       | 41.95 (9.95)           | 41.03 (10.08)           | -0.92 (7.63)                  | -0.09 (-0.28, 0.10)                             | -----                       | -----                   | -----                    | -----                             |
| Latikka <sup>S9</sup><br>Finland                  | 09/2019-10/2019                        | 840 | GHQ-12                     | 12.20 (5.67)           | 12.41 (5.45)            | 0.21 (NR)                     | 0.04 (-0.06, 0.13)                              | -----                       | -----                   | -----                    | -----                             |
| Megias-Robles <sup>S10</sup><br>Spain             | 03/2020-04/2020<br>11/2019             | 102 | PANAS-NA                   | 1.92 (0.65)            | 2.22 (0.75)             | 0.31 (0.80)                   | 0.44 (0.16, 0.71)                               | -----                       | -----                   | -----                    | -----                             |
|                                                   | 04/2020                                |     |                            |                        |                         |                               |                                                 |                             |                         |                          |                                   |

|                                                          |                           |                                                |                                         |               |               |                                                  |                                        |            |                                |                                |                              |
|----------------------------------------------------------|---------------------------|------------------------------------------------|-----------------------------------------|---------------|---------------|--------------------------------------------------|----------------------------------------|------------|--------------------------------|--------------------------------|------------------------------|
| Pierce <sup>S11</sup><br>UK                              | Pre-<br>COVID-19<br>waves |                                                |                                         |               |               |                                                  |                                        |            |                                |                                |                              |
| Daly <sup>S12</sup><br>UK                                | 04/2020                   | 15,376 <sup>30,b</sup><br>10,918 <sup>34</sup> | GHQ-12                                  | 11.50 (5.50)  | 12.60 (6.60)  | 1.10 (NR) <sup>c</sup><br>0.48 (NR) <sup>d</sup> | 0.18 (0.16, 0.21)<br>0.08 (0.05, 0.10) | GHQ-12 ≥ 4 | 20.8 (19.4, 22.2) <sup>e</sup> | 29.5 (28.0, 31.0) <sup>e</sup> | 8.7 (6.9, 10.4) <sup>e</sup> |
|                                                          | 09/2020                   |                                                |                                         | -----         | -----         | -----                                            | -----                                  |            | 20.8 (19.4, 22.2) <sup>e</sup> | 20.8 (19.5, 22.1) <sup>e</sup> | 0.0 (-2.0, 1.9) <sup>e</sup> |
| Shimura <sup>S13</sup><br>Japan                          | NR/2019                   | 3,123                                          | BJSQ<br>(Psychological<br>and Physical) | NR (NR)       | NR (NR)       | -0.31 (11.02)                                    | -0.05 (-0.10, 0.00)                    | -----      | -----                          | -----                          | -----                        |
|                                                          | NR/2020                   |                                                |                                         |               |               |                                                  |                                        |            |                                |                                |                              |
| Soltanzadeh <sup>S14</sup><br>Iran                       | 11/2019                   | 823                                            | GHQ-28                                  | 45.13 (11.65) | 51.41 (12.89) | 6.28 (NR)                                        | 0.51 (0.41, 0.61)                      | -----      | -----                          | -----                          | -----                        |
|                                                          | 07/2020                   |                                                |                                         |               |               |                                                  |                                        |            |                                |                                |                              |
| Thygesen <sup>S15</sup><br>Denmark                       | 09-<br>12/2019            | 4,234                                          | SWEMWBS                                 | 25.50 (4.98)  | 24.60 (4.98)  | -0.90 (NR)                                       | 0.18 (0.14, 0.22)                      | -----      | -----                          | -----                          | -----                        |
|                                                          | 09-<br>11/2020            |                                                |                                         |               |               |                                                  |                                        |            |                                |                                |                              |
| van der<br>Velden,<br>2020 <sup>S16</sup><br>Netherlands | 03/2019                   | 3,983                                          |                                         |               |               |                                                  |                                        |            |                                |                                |                              |
| van der<br>Velden,<br>2021 <sup>S17</sup><br>Netherlands | 11-<br>12/2019            | 4,064                                          | MHI-5 <sup>f</sup>                      |               |               |                                                  |                                        | MHI-5 ≤ 59 |                                |                                |                              |
|                                                          | 03/2020                   |                                                |                                         | 74.20 (16.70) | 74.10 (16.40) | -0.10 (NR)                                       | 0.01 (-0.04, 0.05)                     |            | -----                          | -----                          | -----                        |
|                                                          | 11-<br>12/2020            |                                                |                                         | -----         | -----         | -----                                            | -----                                  |            | 16.9 (15.8, 18.1)              | 16.9 (15.8, 18.1)              | 0.0 (-1.2, 1.3)              |
| <b>Older Adults</b>                                      |                           |                                                |                                         |               |               |                                                  |                                        |            |                                |                                |                              |
| Eliassen <sup>S22</sup><br>Denmark                       | 12/2017-<br>01/2019       | 225                                            | WHOQOL-<br>BREF                         | 74.33 (14.96) | 71.88 (15.21) | -2.45 (NR)                                       | 0.16 (-0.02, 0.35)                     | -----      | -----                          | -----                          | -----                        |

|                                       |                           |                                                                            |                                       |               |               |                                                  |                                         |            |                                |                                |                              |
|---------------------------------------|---------------------------|----------------------------------------------------------------------------|---------------------------------------|---------------|---------------|--------------------------------------------------|-----------------------------------------|------------|--------------------------------|--------------------------------|------------------------------|
|                                       |                           |                                                                            | WHOQOL-BREF<br>(psychological health) | 77.07 (11.52) | 80.53 (10.89) | 3.46 (NR)                                        | -0.31 (-0.49, -0.12)                    |            |                                |                                |                              |
|                                       | 06/2020-07/2020           |                                                                            |                                       |               |               |                                                  |                                         |            |                                |                                |                              |
|                                       | 10/2019                   |                                                                            |                                       |               |               |                                                  |                                         |            |                                |                                |                              |
| Kera <sup>S24</sup><br>Japan          |                           | 533                                                                        | WHO-5-J                               | 16.70 (4.79)  | 15.10 (4.79)  | -1.60 (NR)                                       | 0.33 (0.21, 0.45)                       | -----      | -----                          | -----                          | -----                        |
|                                       | 06-07/2020                |                                                                            |                                       |               |               |                                                  |                                         |            |                                |                                |                              |
|                                       | NR/2019                   |                                                                            |                                       |               |               |                                                  |                                         |            |                                |                                |                              |
| Kivi <sup>S25</sup><br>Sweden         |                           | 1,071                                                                      | SWLS <sup>f</sup>                     | 5.12 (1.30)   | 5.16 (1.26)   | 0.04 (NR)                                        | -0.03 (-0.12, 0.05)                     | -----      | -----                          | -----                          | -----                        |
|                                       | 03-04/2020                |                                                                            |                                       |               |               |                                                  |                                         |            |                                |                                |                              |
|                                       | 10/2019                   |                                                                            | PWBS                                  | 97.85 (21.30) | 99.50 (19.30) | 1.65 (11.53)                                     | -0.08 (-0.32, 0.15)                     |            |                                |                                |                              |
| Martínez <sup>S27</sup><br>Spain      |                           | 141                                                                        | PERMA - PA                            | 7.27 (1.38)   | 7.20 (1.40)   | -0.07 (1.14)                                     | 0.05 (-0.18, 0.28)                      | -----      | -----                          | -----                          | -----                        |
|                                       | 04/2020                   |                                                                            | PERMA - NA                            | 4.12 (1.50)   | 3.90 (1.60)   | -0.22 (1.22)                                     | -0.14 (-0.38, 0.09)                     |            |                                |                                |                              |
|                                       | NR/2017-<br>NR/2019       |                                                                            |                                       |               |               |                                                  |                                         |            |                                |                                |                              |
| Okely <sup>S28</sup><br>Scotland (UK) |                           | 137                                                                        | WEMWBS <sup>f</sup>                   | 37.45 (8.37)  | 36.45 (8.23)  | -1.00 (NR)                                       | 0.12 (-0.12, 0.36)                      | -----      | -----                          | -----                          | -----                        |
|                                       | 05-06/2020                |                                                                            |                                       |               |               |                                                  |                                         |            |                                |                                |                              |
| Pierce <sup>S11</sup><br>UK           | Pre-<br>COVID-19<br>waves |                                                                            |                                       |               |               |                                                  |                                         |            |                                |                                |                              |
| Daly <sup>S12</sup><br>UK             |                           | 2,491 (≥70<br>years) <sup>30,b</sup><br>3,447 (≥65<br>years) <sup>34</sup> | GHQ-12                                | 10.10 (4.57)  | 10.90 (5.35)  | 0.80 (NR) <sup>c</sup><br>0.05 (NR) <sup>d</sup> | 0.16 (0.11, 0.21)<br>0.01 (-0.04, 0.06) | GHQ-12 ≥ 4 | 12.7 (10.3, 15.1) <sup>e</sup> | 19.4 (17.1, 21.8) <sup>e</sup> | 6.8 (3.7, 9.8) <sup>e</sup>  |
|                                       | 04/2020                   |                                                                            |                                       |               |               |                                                  |                                         |            |                                |                                |                              |
|                                       | 09/2020                   |                                                                            |                                       | -----         | -----         | -----                                            | -----                                   |            | 12.7 (10.3, 15.1) <sup>e</sup> | 14.9 (12.9, 16.9) <sup>e</sup> | 2.2 (-0.8, 5.2) <sup>e</sup> |
|                                       | 10/2018-<br>10/2019       |                                                                            |                                       |               |               |                                                  |                                         |            |                                |                                |                              |
| Sardella <sup>S30</sup><br>Italy      |                           | 104                                                                        | SF-12 Mental<br>Component<br>Summary  | 49.99 (9.99)  | 46.35 (10.06) | -3.64 (NR)                                       | -0.36 (-0.64, -0.09)                    | -----      | -----                          | -----                          | -----                        |
|                                       | 04/2020                   |                                                                            |                                       |               |               |                                                  |                                         |            |                                |                                |                              |

|                                                          |                                                |           |            |              |              |             |                      |            |                                |                               |                  |
|----------------------------------------------------------|------------------------------------------------|-----------|------------|--------------|--------------|-------------|----------------------|------------|--------------------------------|-------------------------------|------------------|
| Siew <sup>S31</sup><br>Singapore                         | 02/2018-<br>01/2020                            | 411       | WHOQOL-AGE | 50.36 (5.71) | 52.19 (6.42) | 1.83 (NR)   | -0.30 (-0.44, -0.16) | -----      | -----                          | -----                         | -----            |
| Thygesen <sup>S15</sup><br>Denmark                       | 05-<br>06/2020<br>09-<br>12/2019               | 423       | SWEMWBS    | 25.70 (6.82) | 25.00 (5.77) | -0.70 (NR)  | 0.11 (-0.02, 0.25)   | -----      | -----                          | -----                         | -----            |
| van der<br>Velden,<br>2020 <sup>S16</sup><br>Netherlands | 03/2019                                        | 949-1,038 |            |              |              |             |                      |            |                                |                               |                  |
| van der<br>Velden,<br>2021 <sup>S17</sup><br>Netherlands | 11-<br>12/2019                                 | 968-1,052 |            |              |              |             |                      |            |                                |                               |                  |
| van Tilburg <sup>S33</sup><br>Netherlands                |                                                | 1,679     |            |              |              |             |                      |            |                                |                               |                  |
|                                                          | 03/2020 <sup>36</sup>                          |           |            |              |              |             |                      | MHI-5 ≤ 59 | 10.9 (9.0, 13.0)               | 10.6 (8.9, 12.6)              | -0.2 (-2.3, 1.9) |
|                                                          | 05/2020 <sup>41</sup>                          |           |            | 4.93 (0.75)  | 5.02 (0.73)  | 0.09 (0.58) | -0.12 (-0.19, -0.05) | -----      | -----                          | -----                         | -----            |
|                                                          | 11-<br>12/2020 <sup>37</sup><br>05-<br>06/2019 |           |            |              |              |             |                      | MHI-5 ≤ 59 | 12.1 (10.2, 14.3) <sup>9</sup> | 10.5 (8.8, 12.5) <sup>9</sup> | -1.7 (-3.7, 0.4) |
| Wang, Yi <sup>S34</sup><br>China                         | 08-<br>09/2020                                 | 2,745     | K10        | 16.64 (7.44) | 18.23 (8.06) | 1.35 (6.15) | 0.17 (0.12, 0.23)    | -----      | -----                          | -----                         | -----            |

---

### Young Adults

---

|                                   |                                             |                                        |        |       |       |       |       |            |                   |                   |                 |
|-----------------------------------|---------------------------------------------|----------------------------------------|--------|-------|-------|-------|-------|------------|-------------------|-------------------|-----------------|
| Islam <sup>S37</sup><br>Australia | NR/2018                                     | 1,110                                  | K10    | ----- | ----- | ----- | ----- | K10 ≥ 25   | 41.3 (38.4, 44.2) | 41.3 (38.4, 44.2) | 0.0 (-3.8, 3.8) |
| Pierce <sup>S11</sup><br>UK       | 10-<br>12/2020<br>Pre-<br>COVID-19<br>waves | 1,999 (25-34<br>years) <sup>30,b</sup> | GHQ-12 |       |       |       |       | GHQ-12 ≥ 4 |                   |                   |                 |
| Daly <sup>S12</sup><br>UK         |                                             | 1,260 (18-34<br>years) <sup>34</sup>   |        |       |       |       |       |            |                   |                   |                 |

|                                                                         |                |             |                    |              |              |                        |                    |            |                                |                                |                               |
|-------------------------------------------------------------------------|----------------|-------------|--------------------|--------------|--------------|------------------------|--------------------|------------|--------------------------------|--------------------------------|-------------------------------|
|                                                                         | 04/2020        |             |                    | 12.10 (5.46) | 14.20 (6.32) | 2.10 (NR) <sup>c</sup> | 0.36 (0.29, 0.42)  |            | 25.4 (21.6, 29.2) <sup>e</sup> | 39.9 (35.5, 44.4) <sup>e</sup> | 14.5 (9.6, 19.4) <sup>e</sup> |
|                                                                         |                |             |                    | -----        | -----        | 1.61 (NR) <sup>d</sup> | 0.27 (0.21, 0.34)  |            |                                |                                |                               |
|                                                                         | 09/2020        |             |                    |              |              | -----                  | -----              |            | 25.4 (21.6, 29.2) <sup>e</sup> | 23.7 (19.8, 27.6) <sup>e</sup> | -1.7 (-5.9, 2.5) <sup>e</sup> |
| Tanioka <sup>S41</sup><br>Japan                                         | 10/2019        | 2,222       | K6-J<br>SF-8 - MCS | 6.10 (5.70)  | 6.10 (5.80)  | 0.00 (NR)              | 0.00 (-0.06, 0.06) |            |                                |                                |                               |
|                                                                         | 05/2020        |             |                    |              |              | 0.60 (NR)              | 0.08 (0.02, 0.14)  | -----      | -----                          | -----                          | -----                         |
| van der<br>Velden,<br>2020 <sup>S16</sup>                               | 03/2019        | 993-1,062   |                    |              |              |                        |                    |            |                                |                                |                               |
| Netherlands<br>van der<br>Velden,<br>2021 <sup>S17</sup><br>Netherlands | 11-<br>12/2019 | 1,018-1,083 |                    |              |              |                        |                    |            |                                |                                |                               |
|                                                                         |                |             | -----              | -----        | -----        | -----                  | -----              | MHI-5 ≤ 59 |                                |                                |                               |
|                                                                         | 03/2020        |             |                    |              |              |                        |                    |            | 23.1 (20.6, 25.7)              | 19.7 (17.4, 22.3)              | -3.3 (-6.1, -0.6)             |
|                                                                         | 11-<br>12/2020 |             |                    |              |              |                        |                    |            | 20.7 (18.4, 23.2) <sup>g</sup> | 22.5 (20.0, 25.2) <sup>g</sup> | 1.8 (-1.1, 4.7)               |
| Villadsen <sup>S42</sup><br>UK                                          | NR/2018        | 1,615       | K6                 | -----        | -----        | -----                  | -----              | K6 ≥ 13    | 18.0 (15.2, 21.2)              | 18.7 (15.7, 22.1)              | 0.7 (-1.4, 2.8)               |
|                                                                         | 05/2020        |             |                    |              |              |                        |                    |            |                                |                                |                               |

### University Students

|                               |         |             |                        |              |              |              |                      |                   |                   |                   |                |
|-------------------------------|---------|-------------|------------------------|--------------|--------------|--------------|----------------------|-------------------|-------------------|-------------------|----------------|
| Dong <sup>S45</sup><br>China  | 09/2019 | 4,085-4,341 | -----                  | -----        | -----        | -----        | -----                | SCL-90-R ≥<br>160 | 18.4 (17.3, 19.6) | 26.4 (25.1, 27.8) | 8.0 (6.4, 9.5) |
|                               | NR/2020 |             |                        |              |              |              |                      |                   |                   |                   |                |
| Evans <sup>S47</sup><br>UK    | 10/2019 | 251         | WEMWBSf                | 23.04 (4.96) | 21.12 (4.87) | -1.92 (NR)   | 0.39 (0.21, 0.57)    | -----             | -----             | -----             | -----          |
|                               | 05/2020 |             |                        |              |              |              |                      |                   |                   |                   |                |
| Li, H <sup>S54</sup><br>China | 12/2019 | 555         | PHQ-4                  | 0.95 (0.65)  | 0.76 (0.61)  | -0.19 (0.66) | -0.30 (-0.42, -0.18) | -----             | -----             | -----             | -----          |
|                               | 02/2020 |             | PANAS- PA <sup>f</sup> | 3.21 (0.79)  | 3.26 (0.79)  | 0.06 (0.78)  | -0.08 (-0.19, 0.04)  | -----             | -----             | -----             | -----          |

|                                          |            |                 |                     |                          |                          |                       |                                  |       |       |       |       |
|------------------------------------------|------------|-----------------|---------------------|--------------------------|--------------------------|-----------------------|----------------------------------|-------|-------|-------|-------|
|                                          |            |                 | PANAS- NA           | 2.38 (0.79)              | 2.24 (0.80)              | -0.15 (0.78)          | -0.19 (-0.31, -0.07)             |       |       |       |       |
| Li, R <sup>S55</sup>                     | 09/2019    |                 |                     |                          |                          |                       |                                  |       |       |       |       |
| China                                    |            | 2,603           | SCL-90-R            | 1.60 (0.40)              | 1.52 (0.41)              | -0.08 (0.66)          | -0.20 (-0.25, -0.14)             | ----- | ----- | ----- | ----- |
|                                          | 04/2020    |                 |                     |                          |                          |                       |                                  |       |       |       |       |
| Savage, 2020 <sup>S63</sup>              | 10/2019    |                 |                     |                          |                          |                       |                                  |       |       |       |       |
| UK                                       |            | 214             | WEMWBS <sup>f</sup> | 44.12 (9.16)             | 41.12 (10.14)            | -3.00 (NR)            | 0.31 (0.12, 0.50)                | ----- | ----- | ----- | ----- |
|                                          | 04/2020    |                 |                     |                          |                          |                       |                                  |       |       |       |       |
| Savage, 2021 <sup>S64</sup>              | 10/2019    |                 |                     |                          |                          |                       |                                  |       |       |       |       |
| UK                                       |            | 255             | WEMWBS <sup>f</sup> | 45.2 (9.39)              | 42.3 (9.98)              | -2.90 (NR)            | 0.30 (0.12, 0.47)                | ----- | ----- | ----- | ----- |
|                                          | 10/2020    |                 |                     |                          |                          |                       |                                  |       |       |       |       |
| Truskauskaitė-Kuneviciene <sup>S66</sup> | 10-12/2019 | Lithuania: 450; | PMH                 | Lithuania: 15.66 (5.57); | Lithuania: 16.44 (5.46); | Lithuania: 0.78 (NR); | Lithuania: -0.14 (-0.27, -0.01); | ----- | ----- | ----- | ----- |
| Lithuania                                |            | Germany: 325    |                     | Germany: 18.45 (5.68)    | Germany: 18.64 (5.76)    | Germany: 0.19 (NR)    | Germany: -0.03 (-0.19, 0.12)     | ----- | ----- | ----- | ----- |
| Germany                                  | 03-04/2020 |                 |                     |                          |                          |                       |                                  |       |       |       |       |
|                                          | 11/2019    |                 |                     |                          |                          |                       |                                  |       |       |       |       |
| Wang, Yitao <sup>S68</sup>               |            | 2,559           | SCL-90-R            | 139.64 (38.46)           | 134.57 (40.44)           | -5.07 (NR)            | -0.13 (-0.18, -0.07)             | ----- | ----- | ----- | ----- |
| China                                    | 06/2020    |                 |                     |                          |                          |                       |                                  |       |       |       |       |

### Children and Adolescents

|                           |                 |     |                              |              |              |            |                      |       |       |       |       |
|---------------------------|-----------------|-----|------------------------------|--------------|--------------|------------|----------------------|-------|-------|-------|-------|
|                           | 01-11/2019      |     | SDQ- Internalizing Behaviors | 0.28 (0.35)  | 0.29 (0.35)  | 0.01 (NR)  | 0.03 (-0.16, 0.22)   | ----- | ----- | ----- | ----- |
| Achterberg <sup>S72</sup> |                 | 151 |                              |              |              |            |                      |       |       |       |       |
| Netherlands               |                 |     |                              |              |              |            |                      |       |       |       |       |
|                           | 04-05/2020      |     | SDQ- Externalizing Behaviors | 0.42 (0.39)  | 0.39 (0.38)  | -0.03 (NR) | -0.08 (-0.27, 0.11)  | ----- | ----- | ----- | ----- |
|                           | NR/2018-2019    |     | SDQ - Total score            | 13.93 (6.16) | 13.23 (6.43) | -0.70 (NR) | -0.11 (-0.22, 0.00)  | ----- | ----- | ----- | ----- |
| Bado <sup>S74</sup>       |                 | 672 | SDQ - Emotion subscale       | 4.21 (2.63)  | 3.82 (2.74)  | -0.39 (NR) | -0.15 (-0.25, -0.04) | ----- | ----- | ----- | ----- |
| Brazil                    |                 |     |                              |              |              |            |                      |       |       |       |       |
|                           | 04/2020-04/2021 |     |                              |              |              |            |                      |       |       |       |       |
| Bernasco <sup>S75</sup>   | NR/2019         | 245 |                              | 1.17 (0.17)  | 1.18 (0.19)  | 0.01 (NR)  | 0.06 (-0.12, 0.23)   | ----- | ----- | ----- | ----- |

|                                        |                 |           |                          |               |               |             |                     |                |                   |                   |                  |
|----------------------------------------|-----------------|-----------|--------------------------|---------------|---------------|-------------|---------------------|----------------|-------------------|-------------------|------------------|
| Netherlands                            |                 |           | RCADS - Parents          | 1.47 (0.31)   | 1.43 (0.33)   | -0.04 (NR)  | -0.12 (-0.30, 0.05) |                |                   |                   |                  |
|                                        | 04-07/2020      |           | RCADS - Adolescents      |               |               |             |                     |                |                   |                   |                  |
|                                        | NR/2019         |           | SDQ - Emotion Symptoms   | 2.42 (2.14)   | 3.29 (2.29)   | 0.87 (NR)   | 0.39 (0.27, 0.51)   |                |                   |                   |                  |
| Bosch <sup>S76</sup><br>Spain          |                 | 552       | SDQ - Total              | 8.62 (5.59)   | 11.20 (5.62)  | 2.58 (NR)   | 0.46 (0.34, 0.58)   | -----          | -----             | -----             | -----            |
|                                        | 05/2020-06/2020 |           |                          |               |               |             |                     |                |                   |                   |                  |
| Chen, I-H <sup>S78</sup><br>China      | 10-11/2019      | 535       | DASS-21                  | 0.46 (0.49)   | 1.22 (0.30)   | 0.76 (NR)   | 1.87 (1.72, 2.01)   | -----          | -----             | -----             | -----            |
|                                        | 03/2020         |           |                          |               |               |             |                     |                |                   |                   |                  |
| Chen, C-Y <sup>S79</sup><br>China      | 10-11/2019      | 575       | DASS-21                  | 21.85 (22.94) | 19.15 (22.13) | -2.70 (NR)  | -0.12 (-0.24, 0.00) | -----          | -----             | -----             | -----            |
|                                        | 01/2020         |           |                          |               |               |             |                     |                |                   |                   |                  |
| Daniunaite <sup>S80</sup><br>Lithuania | 03-05/2019      | 331       | SDQ - Emotional Symptoms | 2.86 (2.29)   | 3.27 (2.47)   | 0.41 (NR)   | 0.17 (0.02, 0.32)   | -----          | -----             | -----             | -----            |
|                                        | 09-10/2020      |           |                          |               |               |             |                     |                |                   |                   |                  |
| Ezpeleta <sup>S81</sup><br>Spain       | NR/2019         | 197       | SDQ-total Parent Version | 5.45 (4.65)   | 6.20 (4.44)   | 0.75 (3.75) | 0.16 (-0.03, 0.36)  | -----          | -----             | -----             | -----            |
|                                        | 06/2020         |           |                          |               |               |             |                     |                |                   |                   |                  |
| Fujihara <sup>S82</sup><br>Japan       | 12/2019         | 1,854     | K6                       | 5.04 (5.07)   | 5.73 (5.14)   | 0.69 (NR)   | 0.14 (0.07, 0.20)   | -----          | -----             | -----             | -----            |
|                                        | 02/2020         |           |                          |               |               |             |                     |                |                   |                   |                  |
| Hu <sup>S83</sup><br>UK                | NR              | 886       | SDQ - Emotion Problems   | 3.22 (2.44)   | 3.45 (2.44)   | 0.23 (NR)   | 0.09 (0.00, 0.19)   | -----          | -----             | -----             | -----            |
|                                        | 07/2020         |           |                          |               |               |             |                     |                |                   |                   |                  |
| Knowles <sup>S84</sup><br>UK           | NR/2018-2019    | 958-1,055 | SDQ score                | -----         | -----         | -----       | -----               | SDQ score ≥ 18 | 18.3 (13.9, 23.8) | 15.9 (13.0, 19.4) | -2.4 (-4.9, 0.1) |
|                                        | 05-08/2020      |           |                          |               |               |             |                     |                |                   |                   |                  |

|                                     |                 |       |                                           |               |               |            |                      |       |       |       |       |
|-------------------------------------|-----------------|-------|-------------------------------------------|---------------|---------------|------------|----------------------|-------|-------|-------|-------|
| Mastorci <sup>S88</sup><br>Italy    | 09-10/2019      | 1,019 | KIDSCREEN-52<br>(psychological wellbeing) | 50.23 (9.37)  | 48.87 (9.83)  | -1.36 (NR) | 0.14 (0.05, 0.23)    | ----- | ----- | ----- | ----- |
|                                     | 04/2020         |       | KIDSCREEN-52<br>(mood/emotion)            | 48.62 (9.90)  | 48.03 (9.82)  | -0.59 (NR) | 0.06 (0.03, 0.15)    | ----- | ----- | ----- | ----- |
| Meireles <sup>S89</sup><br>Portugal | 04-07/2019      | 1,099 | KIDSCREEN-10                              | 3.72 (0.61)   | 3.80 (0.56)   | 0.08 (NR)  | -0.14 (-0.22, -0.05) | ----- | ----- | ----- | ----- |
|                                     | 05-06/2020      |       |                                           |               |               |            |                      |       |       |       |       |
| Paizan <sup>S91</sup><br>Germany    | 06-10/2019      | 226   | SWLS                                      | 5.37 (1.19)   | 5.11 (1.27)   | -0.26 (NR) | 0.21 (0.03, 0.40)    | ----- | ----- | ----- | ----- |
|                                     | 05-07/2020      |       |                                           |               |               |            |                      |       |       |       |       |
| Rau <sup>S93</sup><br>Germany       | 10-11/2019      | 777   | KIDSCREEN-10                              | 51.40 (13.10) | 52.30 (13.90) | 0.90 (NR)  | -0.07 (-0.17, 0.03)  | ----- | ----- | ----- | ----- |
|                                     | 06-07/2020      |       |                                           |               |               |            |                      |       |       |       |       |
| Shoshani <sup>S94</sup><br>Israel   | 09/2019         | 1,537 | PANAS-C - PE                              | 18.15 (3.74)  | 16.20 (3.88)  | -1.95 (NR) | 0.51 (0.44, 0.58)    | ----- | ----- | ----- | ----- |
|                                     |                 |       | PANAS-C - NE                              | 9.58 (3.27)   | 9.54 (3.29)   | -0.04 (NR) | -0.01 (-0.08, 0.06)  | ----- | ----- | ----- | ----- |
|                                     | 05/2020         |       | GSI-18 - BSI                              | 16.47 (11.26) | 19.18 (12.03) | 2.71 (NR)  | 0.23 (0.16, 0.30)    | ----- | ----- | ----- | ----- |
| Vira <sup>S96</sup><br>Sweden       | 10/2019-01/2020 | 849   | SDQ-emotional problems                    | 1.50 (0.45)   | 1.53 (0.46)   | 0.03 (NR)  | 0.07 (-0.03, 0.16)   | ----- | ----- | ----- | ----- |
|                                     | 11/2020-02/2021 |       |                                           |               |               |            |                      |       |       |       |       |

---

**Parents**

|                                          |                 |     |                        |             |             |           |                   |       |       |       |       |
|------------------------------------------|-----------------|-----|------------------------|-------------|-------------|-----------|-------------------|-------|-------|-------|-------|
| Achterberg <sup>S72</sup><br>Netherlands | 01-11/2019      | 106 | BSI                    | 0.19 (0.22) | 0.34 (0.32) | 0.15 (NR) | 0.54 (0.27, 0.82) | ----- | ----- | ----- | ----- |
|                                          | 04-05/2020      |     |                        |             |             |           |                   |       |       |       |       |
| Bosch <sup>S76</sup><br>Spain            | NR/2019         | 699 | SDQ - Emotion Symptoms | 1.63 (1.85) | 2.16 (2.03) | 0.53 (NR) | 0.27 (0.17, 0.38) | ----- | ----- | ----- | ----- |
|                                          | 05/2020-06/2020 |     | SDQ - Total            | 7.02 (5.57) | 9.40 (5.61) | 2.38 (NR) | 0.43 (0.32, 0.53) | ----- | ----- | ----- | ----- |

|                                 |            |     |     |             |             |           |                    |         |                   |                   |                   |
|---------------------------------|------------|-----|-----|-------------|-------------|-----------|--------------------|---------|-------------------|-------------------|-------------------|
| Gagné <sup>S104</sup><br>Canada | 03-05/2019 | 127 | K10 | 1.75 (0.52) | 1.85 (0.61) | 0.10 (NR) | 0.18 (-0.07, 0.42) | K10 ≥ 9 | 41.7 (33.5, 50.4) | 40.2 (32.0, 48.9) | -1.6 (-12.3, 9.2) |
|                                 | 05-07/2020 |     |     |             |             |           |                    |         |                   |                   |                   |

---

**People with Pre-existing Medical Conditions**

---

|                                          |                 |      |                                      |                           |                           |               |                      |       |       |       |       |
|------------------------------------------|-----------------|------|--------------------------------------|---------------------------|---------------------------|---------------|----------------------|-------|-------|-------|-------|
| Becker <sup>S109</sup><br>USA            | 03/2019         | 119  | SF-36 (role emotional)               | 77.30 (26.30)             | 73.70 (27.60)             | -3.60 (NR)    | -0.13 (-0.39, 0.12)  | ----- | ----- | ----- | ----- |
|                                          | 03/2020         |      |                                      |                           |                           |               |                      |       |       |       |       |
| Bonenkamp <sup>S110</sup><br>Netherlands | 08/2019         | 177  | SF-12 Mental Component Summary       | 48.08 (10.15)             | 49.00 (10.04)             | 0.91 (10.18)  | 0.09 (-0.12, 0.30)   | ----- | ----- | ----- | ----- |
|                                          | 07/2020         |      |                                      |                           |                           |               |                      |       |       |       |       |
| Chiu <sup>S112</sup><br>USA              | 10/2018         | 133  | SPANE-P                              | 22.78 (3.88)              | 21.11 (4.18)              | -1.67 (5.31)  | 0.41 (0.17, 0.66)    | ----- | ----- | ----- | ----- |
|                                          | 09/2020         |      | SPANE-N                              | 14.50 (4.35)              | 16.11 (4.51)              | 1.61 (5.95)   | 0.36 (0.12, 0.60)    |       |       |       |       |
| Derksen <sup>S113</sup><br>Netherlands   | 01/2019-01/2020 | 2176 | EORTC QLQ-C30-Global quality of life | 79.83 (16.38)             | 79.41 (16.18)             | -0.42 (10.23) | 0.03 (-0.03, 0.09)   | ----- | ----- | ----- | ----- |
|                                          | 04-06/2020      |      | EORTC QLQ-C30-Emotional functioning  | 86.93 (17.37)             | 87.92 (15.79)             | 0.99 (14.95)  | -0.06 (-0.12, -0.00) |       |       |       |       |
| Dunlop-Thomas <sup>S114</sup><br>USA     | NR/2017-2019    | 852  | PROMIS - Global mental health        | 43.57 (9.34)              | 43.75 (9.08)              | 0.18 (NR)     | 0.02 (-0.08, 0.11)   | ----- | ----- | ----- | ----- |
|                                          | NR/2020-2021    |      |                                      |                           |                           |               |                      |       |       |       |       |
| Fujiwara <sup>S115</sup><br>Japan        | 07-09/2019      | 245  | EQ-5D-5L                             | Median (IQR): 0.69 (0.27) | Median (IQR): 0.69 (0.30) | NR (NR)       | NR (NR)              | ----- | ----- | ----- | ----- |
|                                          | 07-09/2020      |      |                                      |                           |                           |               |                      |       |       |       |       |
| García-Rudolph <sup>S116</sup><br>Spain  | NR              | 175  | WHOQOL-BREF                          | 61.71 (19.75)             | 57.95 (21.96)             | -3.76 (NR)    | 0.18 (-0.03, 0.39)   | ----- | ----- | ----- | ----- |
|                                          | 11/2020         |      |                                      |                           |                           |               |                      |       |       |       |       |

|                                                     |                 |       |                         |                                       |                                       |             |                     |           |                   |                 |                  |
|-----------------------------------------------------|-----------------|-------|-------------------------|---------------------------------------|---------------------------------------|-------------|---------------------|-----------|-------------------|-----------------|------------------|
| Johnstone <sup>S119</sup><br>New Zealand            | NR/2018         | 104   | QOLS                    | 78.74 (14.18)                         | 73.17 (17.66)                         | -5.57 (NR)  | 0.35 (0.07, 0.62)   | -----     | -----             | -----           | -----            |
|                                                     | 07-09/2020      |       |                         |                                       |                                       |             |                     |           |                   |                 |                  |
| Lim <sup>S122</sup><br>USA                          | NR/2018         | 316   | PROMIS<br>Mental Health | 44.30 (9.30)                          | 44.50 (8.90)                          | 0.20 (7.40) | 0.02 (-0.13, 0.18)  | -----     | -----             | -----           | -----            |
|                                                     | 04/2020         |       |                         |                                       |                                       |             |                     |           |                   |                 |                  |
| Möller <sup>S123</sup><br>Australia, New<br>Zealand | 08-10/2019      | 674   | DASS-21                 | 18.95 (18.35)                         | 18.07 (17.53)                         | -0.88 (NR)  | -0.05 (-0.16, 0.06) | -----     | -----             | -----           | -----            |
|                                                     | 05-07/2020      |       | EUROHIS-QOL             | 32.35 (5.34)                          | 32.70 (5.06)                          | 0.35 (NR)   | -0.07 (-0.17, 0.04) |           |                   |                 |                  |
| Park <sup>S124</sup><br>Germany                     | 09/2019–02/2020 | 152   | EQ-5D-3L                | Median<br>(IQR): 8.00<br>(7.00, 9.00) | Median (IQR):<br>8.00 (6.00,<br>9.00) | NR (NR)     | NR (NR)             | -----     | -----             | -----           | -----            |
|                                                     | 05-09/2020      |       |                         |                                       |                                       |             |                     |           |                   |                 |                  |
| Sacre <sup>S125</sup><br>Australia                  | NR/2018-2019    | 450   | PAID                    | -----                                 | -----                                 | -----       | -----               | PAID ≥ 40 | 14.7 (11.7, 18.2) | 7.8 (5.7, 10.6) | -6.9 (-9.6, 4.5) |
|                                                     | 05-06/2020      |       |                         |                                       |                                       |             |                     |           |                   |                 |                  |
| Sbragia <sup>S126</sup><br>Italy                    | 01/2019         | 106   | HADS                    | 12.91 (6.52)                          | 11.60 (7.17)                          | -1.31 (NR)  | -0.19 (-0.46, 0.08) | -----     | -----             | -----           | -----            |
|                                                     | 05/2020         |       |                         |                                       |                                       |             |                     |           |                   |                 |                  |
| Soltanzadeh <sup>S14</sup><br>Iran                  | 11/2019         | 136   | GHQ-28                  | 47.51 (11.37)                         | 54.61 (13.23)                         | 7.10 (NR)   | 0.56 (0.09, 1.04)   | -----     | -----             | -----           | -----            |
|                                                     | 07/2020         |       |                         |                                       |                                       |             |                     |           |                   |                 |                  |
| Thygesen <sup>S15</sup><br>Denmark                  | 09-12/2019      | 1,543 | SWEMWBS                 | 24.20 (3.01)                          | 23.60 (2.00)                          | -0.60 (NR)  | 0.23 (0.16, 0.31)   | -----     | -----             | -----           | -----            |
|                                                     | 09-11/2020      |       |                         |                                       |                                       |             |                     |           |                   |                 |                  |

---

**People with Pre-existing Mental Health Conditions**

|                                 |            |     |        |              |              |            |                     |             |                   |                   |                   |
|---------------------------------|------------|-----|--------|--------------|--------------|------------|---------------------|-------------|-------------------|-------------------|-------------------|
| Huong <sup>S130</sup><br>Taiwan | 01-12/2018 | 114 | BSRS-5 | 12.04 (6.19) | 10.58 (7.00) | -1.46 (NR) | -0.22 (-0.48, 0.04) | BSRS-5 ≥ 10 | 67.5 (58.5, 75.4) | 57.9 (48.7, 66.6) | -9.6 (-23.0, 4.1) |
|---------------------------------|------------|-----|--------|--------------|--------------|------------|---------------------|-------------|-------------------|-------------------|-------------------|

|                                    |                          |     |         |              |              |            |                      |       |       |       |       |
|------------------------------------|--------------------------|-----|---------|--------------|--------------|------------|----------------------|-------|-------|-------|-------|
| Thygesen <sup>S15</sup><br>Denmark | 01-05/2020<br>09-12/2019 | 343 | SWEMWBS | 24.20 (3.01) | 23.60 (2.00) | -0.60 (NR) | -0.22 (-0.37, -0.07) | ----- | ----- | ----- | ----- |
|                                    | 09-11/2020               |     |         |              |              |            |                      |       |       |       |       |

**Women or Females**

|                                       |                                  |                                              |                     |              |               |                                                  |                                        |                |                                |                                |                               |
|---------------------------------------|----------------------------------|----------------------------------------------|---------------------|--------------|---------------|--------------------------------------------------|----------------------------------------|----------------|--------------------------------|--------------------------------|-------------------------------|
| Dong <sup>S45</sup><br>China          | 09/2019                          | 3,162-3,277                                  | -----               | -----        | -----         | -----                                            | -----                                  | SCL-90-R ≥ 160 | 19.7 (18.4, 21.1)              | 27.9 (26.4, 29.5)              | 8.2 (6.3, 10.0)               |
|                                       | NR/2020                          |                                              |                     |              |               |                                                  |                                        |                |                                |                                |                               |
| Fujihara <sup>S82</sup><br>Japan      | 12/2019                          | 942                                          | K6                  | 5.07 (NR)    | 5.85 (NR)     | 0.78 (NR)                                        | NR (NR)                                | -----          | -----                          | -----                          | -----                         |
|                                       | 02/2020                          |                                              |                     |              |               |                                                  |                                        |                |                                |                                |                               |
| Megias-Robles <sup>S10</sup><br>Spain | 11/2019                          | 67                                           | PANAS-NA            | 1.93 (0.65)  | 2.28 (0.79)   | 0.34 (0.86)                                      | 0.48 (0.13, 0.82)                      | -----          | -----                          | -----                          | -----                         |
|                                       | 04/2020                          |                                              |                     |              |               |                                                  |                                        |                |                                |                                |                               |
| Meireles <sup>S89</sup><br>Portugal   | 04-07/2019                       | 582                                          | KIDSCREEN-10        | 3.75 (0.61)  | 3.73 (0.55)   | -0.02 (NR)                                       | 0.03 (-0.08, 0.15)                     | -----          | -----                          | -----                          | -----                         |
|                                       | 05-06/2020<br>Pre-COVID-19 waves |                                              |                     |              |               |                                                  |                                        |                |                                |                                |                               |
| Pierce <sup>S11</sup><br>UK           |                                  |                                              |                     |              |               |                                                  |                                        |                |                                |                                |                               |
| Daly <sup>S12</sup><br>UK             | 04/2020                          | 7,181 <sup>30,b</sup><br>6,380 <sup>34</sup> | GHQ-12              | 12.00 (5.91) | 13.60 (7.14)  | 1.60 (NR) <sup>c</sup><br>0.88 (NR) <sup>d</sup> | 0.24 (0.21, 0.28)<br>0.13 (0.10, 0.17) | GHQ-12 ≥ 4     | 24.5 (22.5, 26.4) <sup>e</sup> | 36.8 (34.8, 38.9) <sup>e</sup> | 12.4 (9.9, 14.9) <sup>e</sup> |
|                                       | 09/2020                          |                                              |                     | -----        | -----         | -----                                            | -----                                  |                | 24.5 (22.5, 26.4) <sup>e</sup> | 25.0 (23.3, 26.8) <sup>e</sup> | 0.5 (-1.8, 2.9) <sup>e</sup>  |
|                                       | 10/2019                          |                                              |                     |              |               |                                                  |                                        |                |                                |                                |                               |
| Savage,<br>2020 <sup>S63</sup><br>UK  | 04/2020                          | 154                                          | WEMWBS <sup>f</sup> | 43.00 (9.00) | 40.00 (10.00) | -3.00 (NR)                                       | 0.31 (0.09, 0.54)                      | -----          | -----                          | -----                          | -----                         |

|                                                          |                           |       |                    |               |               |            |                   |       |                   |                   |                  |
|----------------------------------------------------------|---------------------------|-------|--------------------|---------------|---------------|------------|-------------------|-------|-------------------|-------------------|------------------|
| Soltanzadeh <sup>S14</sup><br>Iran                       | 11/2019                   | 161   | GHQ-28             | 45.11 (12.07) | 50.91 (12.69) | 5.80 (NR)  | 0.47 (0.24, 0.69) | ----- | -----             | -----             | -----            |
| Thygesen <sup>S15</sup><br>Denmark                       | 07/2020<br>09-<br>12/2019 | 2,184 | SWEMWBS            | 25.10 (9.54)  | 24.10 (4.77)  | -1.00 (NR) | 0.13 (0.07, 0.19) | ----- | -----             | -----             | -----            |
| van der<br>Velden,<br>2020 <sup>S16</sup><br>Netherlands | 09-<br>11/2020            | 2,020 |                    |               |               |            |                   |       |                   |                   |                  |
| van der<br>Velden,<br>2021 <sup>S17</sup><br>Netherlands | 03/2019                   | 2,062 |                    |               |               |            |                   |       |                   |                   |                  |
|                                                          | 11-<br>12/2019            |       | MHI-5 <sup>f</sup> | -----         | -----         | -----      | -----             |       | MHI-5 ≤ 59        |                   |                  |
|                                                          | 03/2020                   |       |                    |               |               |            |                   |       | 18.9 (17.3, 20.7) | 18.3 (16.7, 20.1) | -0.6 (-2.5, 1.3) |
|                                                          | 11-<br>12/2020            |       |                    |               |               |            |                   |       | 19.1 (17.4, 20.8) | 17.8 (16.2, 19.5) | -1.3 (-3.1, 0.6) |

### Men or Males

|                                           |                           |           |                  |             |             |             |                      |                   |                   |                   |                |
|-------------------------------------------|---------------------------|-----------|------------------|-------------|-------------|-------------|----------------------|-------------------|-------------------|-------------------|----------------|
| Dong <sup>S45</sup><br>China              | 09/2019                   | 923-1,064 | -----            | -----       | -----       | -----       | -----                | SCL-90-R ≥<br>160 | 14.3 (12.3, 16.5) | 21.2 (18.7, 24.0) | 6.9 (4.0, 9.9) |
| Fujihara <sup>S82</sup><br>Japan          | NR/2020<br>12/2019        | 912       | K6               | 5.01 (NR)   | 5.61 (NR)   | 0.60 (NR)   | NR (NR)              | -----             | -----             | -----             | -----          |
| Megias-<br>Robles <sup>S10</sup><br>Spain | 02/2020<br>11/2019        | 35        | PANAS-NA         | 1.88 (0.67) | 2.11 (0.66) | 0.23 (0.66) | 0.34 (-0.14, 0.82)   | -----             | -----             | -----             | -----          |
| Meireles <sup>S89</sup><br>Portugal       | 04/2020<br>04-<br>07/2019 | 517       | KIDSCREEN-<br>10 | 3.69 (0.61) | 3.88 (0.56) | 0.19 (NR)   | -0.32 (-0.45, -0.20) | -----             | -----             | -----             | -----          |
|                                           | 05-<br>06/2020            |           |                  |             |             |             |                      |                   |                   |                   |                |

|                                                          |                           |                                              |                     |               |               |                                                  |                                         |            |                                |                                |                               |  |
|----------------------------------------------------------|---------------------------|----------------------------------------------|---------------------|---------------|---------------|--------------------------------------------------|-----------------------------------------|------------|--------------------------------|--------------------------------|-------------------------------|--|
| Pierce <sup>S11</sup><br>UK                              | Pre-<br>COVID-19<br>waves |                                              |                     |               |               |                                                  |                                         |            |                                |                                |                               |  |
| Daly <sup>S12</sup><br>UK                                | 04/2020                   | 8,195 <sup>30,b</sup><br>4,538 <sup>34</sup> | GHQ-12              | 10.80 (4.99)  | 11.50 (5.75)  | 0.70 (NR) <sup>c</sup><br>0.03 (NR) <sup>d</sup> | 0.13 (0.10, 0.16)<br>0.01 (-0.03, 0.04) | GHQ-12 ≥ 4 | 16.7 (14.6, 18.7) <sup>e</sup> | 21.1 (19.0, 23.3) <sup>e</sup> | 4.5 (2.0, 7.0) <sup>e</sup>   |  |
|                                                          | 09/2020                   |                                              |                     | -----         | -----         | -----                                            | -----                                   |            | 16.7 (14.6, 18.7) <sup>e</sup> | 16.0 (14.0, 17.9) <sup>e</sup> | -0.7 (-2.9, 1.5) <sup>e</sup> |  |
| Savage,<br>2020 <sup>S63</sup><br>UK                     | 10/2019                   | 60                                           | WEMWBS <sup>f</sup> | 47.00 (9.00)  | 44.00 (10.00) | -3.00 (NR)                                       | 0.31 (-0.04, 0.67)                      | -----      | -----                          | -----                          | -----                         |  |
|                                                          | 04/2020                   |                                              |                     |               |               |                                                  |                                         |            |                                |                                |                               |  |
| Soltanzadeh <sup>S14</sup><br>Iran                       | 11/2019                   | 689                                          | GHQ-28              | 46.12 (11.36) | 51.38 (12.34) | 5.26 (NR)                                        | 0.44 (0.34, 0.55)                       | -----      | -----                          | -----                          | -----                         |  |
|                                                          | 07/2020                   |                                              |                     |               |               |                                                  |                                         |            |                                |                                |                               |  |
| Thygesen <sup>S15</sup><br>Denmark                       | 09-<br>12/2019            | 2,050                                        | SWEMWBS             | 25.10 (5.78)  | 24.40 (16.17) | -0.70 (NR)                                       | 0.06 (-0.00, 0.12)                      | -----      | -----                          | -----                          | -----                         |  |
|                                                          | 09-<br>11/2020            |                                              |                     |               |               |                                                  |                                         |            |                                |                                |                               |  |
| van der<br>Velden,<br>2020 <sup>S16</sup><br>Netherlands | 03/2019                   | 1,962-1,963                                  |                     |               |               |                                                  |                                         |            |                                |                                |                               |  |
| van der<br>Velden,<br>2021 <sup>S17</sup><br>Netherlands | 11-<br>12/2019            | 2,002                                        | MHI-5 <sup>f</sup>  | -----         | -----         | -----                                            | -----                                   | MHI-5 ≤ 59 |                                |                                |                               |  |
|                                                          | 03/2020                   |                                              |                     |               |               |                                                  |                                         |            | 14.6 (13.1, 16.3)              | 15.6 (14.1, 17.3)              | 1.0 (-0.8, 2.7)               |  |
|                                                          | 11-<br>12/2020            |                                              |                     |               |               |                                                  |                                         |            | 14.7 (13.2, 16.3)              | 15.9 (14.4, 17.6)              | 1.2 (-0.5, 3.0)               |  |

BSI = Brief Symptom Inventory; DToS = Distress Tolerance Scale; GHQ-12 = General Health Questionnaire-12; MHI-5 = Mental Health Index-5; PANAS – NA = Positive and Negative Affect Schedule – Negative Affect; PANAS – PA = Positive and Negative Affect Schedule – Positive Affect; PHQ-4 = Patient Health Questionnaire-4; RRQ = Reflection and Rumination Scale; SCL-90-R = Symptom Check List-90-Revised; SDQ – Extern = Strengths and Difficulties Questionnaire – Externalizing Behavior; SDQ – Intern = Strengths and Difficulties Questionnaire – Internalizing Behavior; SDQ – Total = Strengths and Difficulties Questionnaire – Total; SWLS = Satisfaction with Life Scale; WEMWBS = Warwick Edinburgh Mental Wellbeing Scale.

<sup>a</sup>Positive Hedges' g effect sizes and increases in proportions above a threshold indicate worse mental health in COVID-19 compared to pre-COVID-19. Effects for measures where high scores = positive outcomes were reversed to reflect this. <sup>b</sup>Number included in fixed effects regression analysis from where majority of data were extracted. <sup>c</sup>Based on difference between 2020 and 2019 outcomes. <sup>d</sup>Based on estimate from fixed effects regression model that estimates within-person change accounting for pre-COVID-19 trends. <sup>e</sup>Included proportion outcomes from Daly,<sup>31</sup> since Daly reported for two time points. <sup>f</sup>Higher scale scores reflect better mental health; thus, direction of effect sizes reversed. <sup>g</sup>Proportions in the study were calculated using age categories based on previous year's age.

**Supplementary Table 4. Individual Study Results for Anxiety Symptoms**

| First Author                                      | Pre- and Post-COVID-19 Data Collection | N                                                 | Continuous Outcome Measure                                      | Pre-COVID-19 Mean (SD)                                                  | Post-COVID-19 Mean (SD)                                                 | Mean (SD) Change <sup>a</sup>                                            | Hedges' g Standardized Mean Difference (95% CI)                                              | Dichotomous Outcome Measure                                                   | % pre-COVID-19 (95% CI)                                                                   | % post-COVID-19 (95% CI)                                                                  | % Change with 95% CI <sup>a</sup>                                                     |
|---------------------------------------------------|----------------------------------------|---------------------------------------------------|-----------------------------------------------------------------|-------------------------------------------------------------------------|-------------------------------------------------------------------------|--------------------------------------------------------------------------|----------------------------------------------------------------------------------------------|-------------------------------------------------------------------------------|-------------------------------------------------------------------------------------------|-------------------------------------------------------------------------------------------|---------------------------------------------------------------------------------------|
| <b>General Population</b>                         |                                        |                                                   |                                                                 |                                                                         |                                                                         |                                                                          |                                                                                              |                                                                               |                                                                                           |                                                                                           |                                                                                       |
| Chan <sup>S3</sup><br>Hong Kong, China            | 07/2019                                | 279                                               | HAI                                                             | 15.33 (6.31)                                                            | 15.52 (6.70)                                                            | 0.19 (NR)                                                                | 0.03 (-0.14, 0.20)                                                                           | -----                                                                         | -----                                                                                     | -----                                                                                     | -----                                                                                 |
| Ge <sup>S5</sup><br>China                         | 07/2020<br>01-12/2019                  | 1,547-1,978                                       | GAD-7                                                           | 9.24 (2.33)                                                             | 10.02 (2.28)                                                            | 0.78 (NR)                                                                | 0.1 (0.03, 0.18)                                                                             | -----                                                                         | -----                                                                                     | -----                                                                                     | -----                                                                                 |
| Haliwa <sup>S6</sup><br>USA                       | 09-12/2019<br>04-06/2020               | Sample 1: 300;<br>Sample 2: 146;<br>Sample 3: 142 | Sample 1: GAD-7<br>Sample 2: DASS-21-Anxiety<br>Sample 3: GAD-7 | Sample 1: 5.58 (5.02)<br>Sample 2: 3.53 (4.89)<br>Sample 3: 4.64 (5.35) | Sample 1: 6.55 (5.98)<br>Sample 2: 3.25 (4.51)<br>Sample 3: 4.82 (5.60) | Sample 1: 0.97 (4.93)<br>Sample 2: -0.28 (2.82)<br>Sample 3: 0.18 (4.21) | Sample 1: 0.18 (0.01, 0.34)<br>Sample 2: -0.08 (-0.31, 0.15)<br>Sample 3: 0.03 (-0.20, 0.27) | Sample 1: GAD-7 ≥ 10<br>Sample 2: DASS-21-Anxiety ≥ 6<br>Sample 3: GAD-7 ≥ 10 | Sample 1: 19.0 (15.0, 23.8)<br>Sample 2: 21.9 (16.0, 29.3)<br>Sample 3: 20.4 (14.6, 27.8) | Sample 1: 29.7 (24.8, 35.1)<br>Sample 2: 23.3 (17.2, 30.8)<br>Sample 3: 19.7 (14.0, 27.0) | Sample 1: 10.7 (4.6, 16.6)<br>Sample 2: 1.4 (-6.5, 9.2)<br>Sample 3: -0.7 (-8.0, 6.5) |
| Kanbur <sup>S7</sup><br>Turkey                    | NR/2019<br>NR/2020                     | 400                                               | SCL-90-R Anxiety                                                | 0.27 (NR)                                                               | 0.51 (NR)                                                               | 0.24 (NR)                                                                | NR (NR)                                                                                      | -----                                                                         | -----                                                                                     | -----                                                                                     | -----                                                                                 |
| Katz, B <sup>S8</sup><br>Canada, Ireland, UK, USA | 04/2019<br>04/2020                     | 218                                               | DASS-21 Anxiety                                                 | 3.25 (3.91)                                                             | 2.83 (3.61)                                                             | -0.42 (3.13)                                                             | -0.11 (-0.30, 0.08)                                                                          | -----                                                                         | -----                                                                                     | -----                                                                                     | -----                                                                                 |
| <b>Older Adults</b>                               |                                        |                                                   |                                                                 |                                                                         |                                                                         |                                                                          |                                                                                              |                                                                               |                                                                                           |                                                                                           |                                                                                       |
| Bartlett <sup>S19</sup><br>Australia              | 10/2019                                | 1,671                                             | HADS-A                                                          | 5.56 (3.55)                                                             | 4.88 (3.34)                                                             | -0.68 (NR)                                                               | -0.20 (-0.27, -0.13)                                                                         | -----                                                                         | -----                                                                                     | -----                                                                                     | -----                                                                                 |
| Creese <sup>S21</sup>                             | 04-06/2020<br>10/2019                  | 3,281                                             | GAD-7                                                           | 1.55 (2.64)                                                             | 1.94 (2.84)                                                             | 0.39 (NR)                                                                | 0.14 (0.09, 0.19)                                                                            | GAD-7 ≥ 10                                                                    | 2.2 (1.8, 2.8)                                                                            | 2.7 (2.2, 3.3)                                                                            | 0.5 (-0.1, 1.1)                                                                       |

UK

|                                                 |                 |     |            |              |              |             |                    |            |                   |                   |                 |
|-------------------------------------------------|-----------------|-----|------------|--------------|--------------|-------------|--------------------|------------|-------------------|-------------------|-----------------|
|                                                 | 05-06/2020      |     |            |              |              |             |                    |            |                   |                   |                 |
|                                                 | 11/2019         |     |            |              |              |             |                    |            |                   |                   |                 |
| Herrera <sup>S23</sup><br>Chile                 |                 | 721 | GAI-SF     | 2.04 (NR)    | 2.26 (NR)    | 0.22 (NR)   | NR (NR)            | GAI-SF ≥ 3 | 40.0 (36.5, 43.6) | 42.9 (39.3, 46.5) | 2.9 (-1.9, 7.7) |
|                                                 | 09/2020         |     |            |              |              |             |                    |            |                   |                   |                 |
|                                                 | 02-06/2019      |     |            |              |              |             |                    |            |                   |                   |                 |
| Rentscher <sup>S29</sup><br>USA                 |                 | 165 | STAI-State | 27.50 (7.10) | 30.60 (9.60) | 3.10 (NR)   | 0.37 (0.15, 0.58)  | -----      | -----             | -----             | -----           |
|                                                 | 05-09/2020      |     |            |              |              |             |                    |            |                   |                   |                 |
|                                                 | 02-06/2019      |     |            |              |              |             |                    |            |                   |                   |                 |
| Rentscher <sup>S29</sup><br>USA                 |                 | 262 | STAI-State | 27.90 (6.50) | 30.10 (9.10) | 2.20 (NR)   | 0.28 (0.11, 0.45)  | -----      | -----             | -----             | -----           |
|                                                 | 05-09/2020      |     |            |              |              |             |                    |            |                   |                   |                 |
|                                                 | 02/2018-01/2020 |     |            |              |              |             |                    |            |                   |                   |                 |
| Siew <sup>S31</sup><br>Singapore                |                 | 411 | GAI-SF     | 1.12 (2.63)  | 1.40 (3.17)  | 0.28 (NR)   | 0.10 (-0.04, 0.23) | -----      | -----             | -----             | -----           |
|                                                 | 05-06/2020      |     |            |              |              |             |                    |            |                   |                   |                 |
|                                                 | NR/2018-2019    |     |            |              |              |             |                    |            |                   |                   |                 |
| van den Besselaar <sup>S32</sup><br>Netherlands |                 | 984 | HADS-A     | 2.58 (2.70)  | 3.35 (2.99)  | 0.77 (NR)   | 0.27 (0.18, 0.36)  | -----      | -----             | -----             | -----           |
|                                                 | 06-10/2020      |     |            |              |              |             |                    |            |                   |                   |                 |
|                                                 | 04/2018-03/2019 |     |            |              |              |             |                    |            |                   |                   |                 |
| Wong, S <sup>S35</sup><br>Hong Kong, China      |                 | 583 | GAD-7      | 2.50 (NR)    | 3.00 (NR)    | 0.48 (NR)   | NR <sup>b</sup>    | -----      | -----             | -----             | -----           |
|                                                 | 03-04/2020      |     |            |              |              |             |                    |            |                   |                   |                 |
|                                                 | 02/2018-01/2020 |     |            |              |              |             |                    |            |                   |                   |                 |
| Yu <sup>S36</sup><br>Singapore                  |                 | 419 | GAI        | 1.12 (2.58)  | 1.38 (3.14)  | 0.26 (2.31) | 0.09 (-0.05, 0.23) | -----      | -----             | -----             | -----           |
|                                                 | 05-06/2020      |     |            |              |              |             |                    |            |                   |                   |                 |

**Young Adults**

|                              |            |             |       |             |             |             |                     |            |                |                |                  |
|------------------------------|------------|-------------|-------|-------------|-------------|-------------|---------------------|------------|----------------|----------------|------------------|
|                              | NR/2018    |             |       |             |             |             |                     |            |                |                |                  |
| Rimfeld <sup>S39</sup><br>UK |            | 3,563-3,694 | SMGAD | 7.48 (7.35) | 8.69 (7.54) | 1.21 (6.83) | 0.16 (0.12, 0.21)   | -----      | -----          | -----          | -----            |
|                              | 04-05/2020 |             |       |             |             |             |                     |            |                |                |                  |
|                              | NR/2018    | 1,039       | SMGAD | 4.73 (4.61) | 4.45 (4.70) | -0.28 (NR)  | -0.06 (-0.15, 0.03) | GAD-7 ≥ 15 | 4.9 (3.8, 6.4) | 4.7 (3.6, 6.2) | -0.2 (-1.5, 1.1) |

Watkins-  
Martin<sup>S43</sup>  
Canada 08/2020

**University Students**

|                                        |                 |       |                    |              |              |              |                      |            |                   |                   |                   |
|----------------------------------------|-----------------|-------|--------------------|--------------|--------------|--------------|----------------------|------------|-------------------|-------------------|-------------------|
| Conceição <sup>S44</sup><br>Portugal   | 10/2019         | 341   | GAD-7              | 9.89 (6.19)  | 12.15 (6.50) | 2.26 (NR)    | 0.36 (0.20, 0.51)    | GAD-7 ≥ 10 | 46.0 (40.8, 51.4) | 64.5 (59.3, 69.4) | 18.5 (10.1, 26.5) |
|                                        | 06/2020         |       |                    |              |              |              |                      |            |                   |                   |                   |
| Elmer <sup>S46</sup><br>Switzerland    | 09/2019         | 209   | GAD-7              | NR           | NR           | 0.60 (3.47)  | 0.17 (-0.02, 0.36)   | -----      | -----             | -----             | -----             |
|                                        | 04/2020         |       |                    |              |              |              |                      |            |                   |                   |                   |
| Evans <sup>S47</sup><br>UK             | 10/2019         | 251   | HADS-A             | 9.35 (4.28)  | 9.42 (4.47)  | 0.07 (NR)    | 0.02 (-0.16, 0.19)   | -----      | -----             | -----             | -----             |
|                                        | 05/2020         |       |                    |              |              |              |                      |            |                   |                   |                   |
| Gelezelyte <sup>S49</sup><br>Lithuania | 10-12/2019      | 474   | DASS-21 Anxiety    | 6.99 (4.94)  | 5.87 (4.58)  | -1.12 (4.32) | -0.23 (-0.36, -0.11) | -----      | -----             | -----             | -----             |
|                                        | 10-12/2020      |       |                    |              |              |              |                      |            |                   |                   |                   |
| Gopalan <sup>S50</sup><br>USA          | 11/2019         | 1,004 | CCAPS-62 - Anxiety | 1.31 (1.04)  | 1.34 (1.07)  | 0.03 (NR)    | 0.03 (-0.06, 0.12)   | -----      | -----             | -----             | -----             |
|                                        | 05/2020         |       |                    |              |              |              |                      |            |                   |                   |                   |
| Hamza <sup>S51</sup><br>Canada         | 05/2019         | 733   | GAD-7              | 6.68 (5.53)  | 6.39 (5.46)  | -0.29 (NR)   | -0.05 (-0.16, 0.05)  | -----      | -----             | -----             | -----             |
|                                        | 05/2020         |       |                    |              |              |              |                      |            |                   |                   |                   |
| He <sup>S52</sup><br>China             | 09-12/2019      | 589   | STAI-Trait         | 43.27 (7.35) | 44.76 (8.78) | 1.49 (NR)    | 0.18 (0.07, 0.30)    | -----      | -----             | -----             | -----             |
|                                        | 02/2020         |       |                    |              |              |              |                      |            |                   |                   |                   |
| Koelen <sup>S53</sup><br>Netherlands   | 01/2019-01/2020 | 683   | GAD-7              | -----        | -----        | -----        | -----                | GAD-7 ≥ 10 | 33.6 (30.1, 37.2) | 36.5 (32.9, 40.1) | 2.9 (-1.6, 7.4)   |
|                                        | 04-05/2020      |       |                    |              |              |              |                      |            |                   |                   |                   |
|                                        | 11/2019         | 173   | DASS-21 Anxiety    | 9.23 (6.16)  | 5.09 (5.90)  | -4.14 (NR)   | -0.68 (-0.90, -0.47) | -----      | -----             | -----             | -----             |

|                                                                  |                            |                                 |                   |                                                 |                                                 |                                               |                                                                   |                     |                   |                   |                  |  |
|------------------------------------------------------------------|----------------------------|---------------------------------|-------------------|-------------------------------------------------|-------------------------------------------------|-----------------------------------------------|-------------------------------------------------------------------|---------------------|-------------------|-------------------|------------------|--|
| Li, Wendy Wen <sup>S56</sup><br>China                            | 03/2020<br>09/2019-10/2019 |                                 |                   |                                                 |                                                 |                                               |                                                                   |                     |                   |                   |                  |  |
| Lu <sup>S58</sup><br>China                                       | 04/2020                    | 5,181                           | GAD-7             | -----                                           | -----                                           | -----                                         | -----                                                             | GAD-7 ≥ 10          | 3.5 (3.0, 4.0)    | 3.7 (3.2, 4.2)    | 0.2 (-0.3, 0.7)  |  |
| Mauer <sup>S59</sup><br>USA                                      | 09-12/2019<br>03-06/2020   | 1,434                           | DASS-21           | 5.42 (4.68)                                     | 5.04 (4.30)                                     | -0.38 (NR)                                    | -0.08 (-0.16, -0.01)                                              | DASS-21 ≥ 10        | 16.6 (14.8, 18.6) | 16.0 (14.2, 18.0) | -0.6 (-2.7, 1.4) |  |
| Mehus <sup>S60</sup><br>USA                                      | 08,12/2019<br>04/2020      | 727                             | GAD-7             | 5.07 (4.68)                                     | 5.67 (5.09)                                     | 0.60 (NR)                                     | 0.12 (0.02, 0.23)                                                 | GAD-7 ≥ 8           | 24.3 (21.4, 27.6) | 29.6 (26.3, 33.0) | 5.3 (1.3, 9.1)   |  |
| Saraswathi <sup>S62</sup><br>India                               | 12/2019<br>06/2020         | 217                             | DASS-21 Anxiety   | 4.60 (6.19)                                     | 6.11 (7.13)                                     | 1.51 (NR)                                     | 0.23 (0.04, 0.41)                                                 | DASS-21 Anxiety > 7 | 21.2 (16.3, 27.1) | 33.2 (27.3, 39.7) | 12.0 (4.4, 19.4) |  |
| Truskauskaitė-Kuneviciene <sup>S66</sup><br>Lithuania<br>Germany | 10-12/2019<br>03-04/2020   | Lithuania: 450;<br>Germany: 325 | DASS-21 - Anxiety | Lithuania: 7.07 (4.92);<br>Germany: 3.66 (3.66) | Lithuania: 4.16 (4.21);<br>Germany: 2.33 (2.82) | Lithuania: -2.91 (NR);<br>Germany: -1.33 (NR) | Lithuania: -0.63 (-0.77, -0.50);<br>Germany: -0.41 (-0.56, -0.25) | -----               | -----             | -----             | -----            |  |
| Voltmer <sup>S67</sup><br>Germany                                | NR/2019<br>06/2020         | 587                             | BSI-18 Anxiety    | 4.50 (4.40)                                     | 4.10 (4.10)                                     | -0.40 (NR)                                    | -0.09 (-0.21, 0.02)                                               | -----               | -----             | -----             | -----            |  |
| Wang, Yitao <sup>S68</sup><br>China                              | 11/2019<br>06/2020         | 2,559                           | SCL-90-R Anxiety  | 1.55 (0.49)                                     | 1.48 (0.50)                                     | -0.07 (NR)                                    | -0.14 (-0.20, -0.09)                                              | -----               | -----             | -----             | -----            |  |
| Yang, Ziyao <sup>S70</sup><br>China                              | 10/2019<br>05/2020         | 2,364                           | DASS-21 Anxiety   | 9.64 (2.88)                                     | 8.92 (2.96)                                     | -0.72 (NR)                                    | -0.25 (-0.30, -0.19)                                              | -----               | -----             | -----             | -----            |  |
| Zimmerman <sup>S71</sup><br>USA                                  | 08/2019<br>04/2020         | 205                             | GAD-7             | 8.29 (6.28)                                     | 9.71 (6.83)                                     | 1.42 (0.41)                                   | 0.22 (0.02, 0.41)                                                 | -----               | -----             | -----             | -----            |  |

**Children and Adolescents**

|                                         |                             |           |                                |                                       |                                       |             |                      |            |                      |                      |                       |
|-----------------------------------------|-----------------------------|-----------|--------------------------------|---------------------------------------|---------------------------------------|-------------|----------------------|------------|----------------------|----------------------|-----------------------|
| Chen, C-Y <sup>S79</sup><br>China       | 10-11/2019                  | 575       | DASS-21 -<br>Anxiety           | 7.98 (7.93)                           | 7.01 (7.43)                           | -0.97 (NR)  | -0.13 (-0.24, -0.01) | -----      | -----                | -----                | -----                 |
| Knowles <sup>S84</sup><br>UK            | 01/2020<br>NR/2018-<br>2019 | 958-1,055 | GAD-7                          | -----                                 | -----                                 | -----       | -----                | GAD-7 ≥ 10 | 20.5 (17.3,<br>24.3) | 17.3 (14.0,<br>21.0) | -3.1 (-5.8, -<br>0.5) |
| Li, Y <sup>S85</sup><br>China           | 05-08/2020<br>09/2019       | 831       | ZSAS                           | -----                                 | -----                                 | -----       | -----                | ZSAS > 50  | 27.7 (24.7,<br>30.8) | 23.0 (20.3,<br>26.0) | -4.7 (-7.9, -<br>1.4) |
| Magson <sup>S87</sup><br>Australia      | 03/2020<br>NR/2019          | 248       | SCAS<br>Generalized<br>Anxiety | 4.60 (3.74)                           | 5.10 (4.05)                           | 0.50 (1.50) | 0.13 (-0.05, 0.30)   | -----      | -----                | -----                | -----                 |
| Rau <sup>S93</sup><br>Germany           | 10-11/2019                  | 777       | RCADS - Anxiety                | 24.40 (17.70)                         | 21.10 (17.00)                         | -3.30 (NR)  | -0.19 (-0.29, -0.09) | -----      | -----                | -----                | -----                 |
| Shoshani <sup>S94</sup><br>Israel       | 06-07/2020<br>09/2019       | 1,537     | BSI-18 - Anxiety               | 3.93 (2.68)                           | 5.24 (3.14)                           | 1.31 (NR)   | 0.45 (0.38, 0.52)    | -----      | -----                | -----                | -----                 |
| Teng <sup>S95</sup><br>China            | 05/2020<br>10-11/2019       | 1,778     | STAI-Trait                     | 1.95 (0.65)                           | 1.98 (0.66)                           | 0.03 (NR)   | 0.05 (-0.02, 0.11)   | -----      | -----                | -----                | -----                 |
| Wang,<br>Wanxin <sup>S97</sup><br>China | 04-05/2020<br>10-12/2019    | 1,790     | GAD-7                          | 3.60 (4.32)                           | 3.56 (4.22)                           | -0.04 (NR)  | -0.01 (-0.07,0.06)   | GAD-7 ≥ 5  | 31.6 (29.5,<br>33.8) | 32.9 (30.7,<br>35.1) | 1.3 (-1.4, 3.9)       |
| Widnall <sup>S98</sup><br>UK            | 10-12/2020<br>10/2019       | 603       | HADS-A                         | Median<br>(IQR): 7.00<br>(4.00-11.00) | Median<br>(IQR): 6.00<br>(3.00-10.00) | NR (NR)     | NR (NR)              | -----      | -----                | -----                | -----                 |
|                                         | 05/2020                     |           |                                |                                       |                                       |             |                      |            |                      |                      |                       |

|                                 |            |       |                      |             |             |              |                     |       |       |       |       |
|---------------------------------|------------|-------|----------------------|-------------|-------------|--------------|---------------------|-------|-------|-------|-------|
| Wong, R <sup>S99</sup><br>China | 04-08/2019 | 233   | DASS-21 -<br>Anxiety | NR (NR)     | NR (NR)     | 0.13 (5.42)  | NR (NR)             | ----- | ----- | ----- | ----- |
|                                 | 02/2020    |       |                      |             |             |              |                     |       |       |       |       |
| Zhang <sup>S101</sup><br>China  | 11/2019    | 1,241 | HBQ Anxiety          | 3.06 (0.90) | 3.02 (1.05) | -0.05 (0.90) | -0.05 (-0.13, 0.03) | ----- | ----- | ----- | ----- |
|                                 | 05/2020    |       |                      |             |             |              |                     |       |       |       |       |

---

**Parents**

---

|                                            |                  |       |       |             |             |             |                   |            |                 |                      |                      |
|--------------------------------------------|------------------|-------|-------|-------------|-------------|-------------|-------------------|------------|-----------------|----------------------|----------------------|
| Loret de<br>Mola <sup>S105</sup><br>Brazil | 01-12/2019       | 1,028 | GAD-7 | -----       | -----       | -----       | -----             | GAD-7 ≥ 10 | 9.7 (8.1, 11.7) | 25.9 (23.3,<br>28.6) | 16.2 (13.2,<br>19.1) |
|                                            | 05-07/2020       |       |       |             |             |             |                   |            |                 |                      |                      |
| Thompson <sup>S108</sup><br>USA            | NR/2018-<br>2019 | 147   | GAD-7 | 6.05 (4.70) | 7.42 (5.92) | 1.37 (6.02) | 0.25 (0.02, 0.49) | -----      | -----           | -----                | -----                |
|                                            | 04/2020          |       |       |             |             |             |                   |            |                 |                      |                      |

---

**People with Pre-existing Medical Conditions**

---

|                                             |                     |      |                |                                 |                                 |              |                     |       |       |       |       |
|---------------------------------------------|---------------------|------|----------------|---------------------------------|---------------------------------|--------------|---------------------|-------|-------|-------|-------|
| Chiu <sup>S112</sup><br>USA                 | 10/2018             | 133  | HADS-A         | 6.89 (3.92)                     | 6.95 (3.85)                     | 0.06 (3.30)  | 0.02 (-0.22, 0.25)  | ----- | ----- | ----- | ----- |
|                                             | 09/2020             |      |                |                                 |                                 |              |                     |       |       |       |       |
| Derksen <sup>S113</sup><br>Netherlands      | 01/2019-<br>01/2020 | 2176 | HADS-A         | 3.24 (3.20)                     | 3.18 (3.16)                     | -0.06 (2.34) | -0.02 (-0.08, 0.04) | ----- | ----- | ----- | ----- |
|                                             | 04-06/2020          |      |                |                                 |                                 |              |                     |       |       |       |       |
| Fujiwara <sup>S115</sup><br>Japan           | 07-09/2019          | 245  | HADS-A         | Median<br>(IQR): 6.00<br>(5.00) | Median<br>(IQR): 6.00<br>(6.00) | NR (NR)      | NR (NR)             | ----- | ----- | ----- | ----- |
|                                             | 07-09/2020          |      |                |                                 |                                 |              |                     |       |       |       |       |
| García-<br>Rudolph <sup>S116</sup><br>Spain | NR                  | 175  | HADS-A         | 6.21 (4.28)                     | 6.52 (4.64)                     | 0.31 (NR)    | 0.07 (-0.14, 0.28)  | ----- | ----- | ----- | ----- |
|                                             | 11/2020             |      |                |                                 |                                 |              |                     |       |       |       |       |
| Henry <sup>S118</sup>                       | 07-12/2019          | 435  | PROMIS Anxiety |                                 |                                 |              |                     | ----- | ----- | ----- | ----- |

|                                          |                 |       |                |                                 |                                 |              |                     |            |                   |                   |                    |
|------------------------------------------|-----------------|-------|----------------|---------------------------------|---------------------------------|--------------|---------------------|------------|-------------------|-------------------|--------------------|
| Canada, France, UK, USA                  | 04/2020         |       |                | 52.66 (10.41)                   | 57.54 (8.79)                    | 4.88 (NR)    | 0.51 (0.37, 0.64)   |            |                   |                   |                    |
|                                          | 09-10/2020      |       |                | 52.66 (10.41)                   | 53.75 (9.46)                    | 1.09 (NR)    | 0.11 (-0.02, 0.24)  |            |                   |                   |                    |
|                                          | 03/2021         |       |                | 52.66 (10.41)                   | 53.19 (9.70)                    | 0.53 (NR)    | 0.05 (-0.08, 0.18)  |            |                   |                   |                    |
| Johnstone <sup>S119</sup><br>New Zealand | NR/2018         | 104   | HADS-A         | 5.88 (4.12)                     | 5.55 (4.23)                     | -0.33 (NR)   | -0.08 (-0.35, 0.19) | -----      | -----             | -----             | -----              |
|                                          | 07-09/2020      |       |                |                                 |                                 |              |                     |            |                   |                   |                    |
| Katz, P <sup>S120</sup><br>USA           | NR/2019         | 1,504 | GAD-2          | 0.66 (1.18)                     | 0.99 (1.35)                     | 0.33 (NR)    | 0.26 (0.19, 0.33)   | -----      | -----             | -----             | -----              |
|                                          | 03-06/2020      |       |                |                                 |                                 |              |                     |            |                   |                   |                    |
| Liang <sup>S121</sup><br>China           | 12/2019         | 114   | ZSAS           | 32.80 (7.20)                    | 32.80 (7.20)                    | 0.00 (NR)    | 0.00 (-0.27, 0.27)  | -----      | -----             | -----             | -----              |
|                                          | 02-03/2020      |       |                |                                 |                                 |              |                     |            |                   |                   |                    |
| Lim <sup>S122</sup><br>USA               | NR/2018         | 316   | PROMIS Anxiety | 50.30 (11.30)                   | 50.30 (11.10)                   | 0.00 (10.20) | 0.00 (-0.16, 0.16)  | -----      | -----             | -----             | -----              |
|                                          | 04/2020         |       |                |                                 |                                 |              |                     |            |                   |                   |                    |
| Park <sup>S124</sup><br>Germany          | 09/2019–02/2020 | 152   | HADS-A         | Median (IQR): 6.00 (2.00, 9.00) | Median (IQR): 6.00 (3.00, 8.00) | NR (NR)      | NR (NR)             | HADS-A ≥ 8 | 17.0 (12.0, 23.9) | 11.0 (6.6, 16.4)  | -5.9 (-11.5, -0.6) |
|                                          | 05-09/2020      |       |                |                                 |                                 |              |                     |            |                   |                   |                    |
| Rentscher <sup>S29</sup><br>USA          | 02-06/2019      | 262   | STAI-State     | 27.90 (6.50)                    | 30.10 (9.10)                    | 2.20 (NR)    | 0.28 (0.11, 0.45)   | -----      | -----             | -----             | -----              |
|                                          | 05-09/2020      |       |                |                                 |                                 |              |                     |            |                   |                   |                    |
| Sacre <sup>S125</sup><br>Australia       | NR/2018-2019    | 450   | GAD-7          | 3.30 (4.10)                     | 3.10 (4.30)                     | -0.20 (NR)   | -0.05 (-0.18, 0.08) | GAD-7 ≥ 10 | 8.4 (6.2, 11.4)   | 8.4 (6.2, 11.4)   | 0.0 (-2.8, 2.8)    |
|                                          | 05-06/2020      |       |                |                                 |                                 |              |                     |            |                   |                   |                    |
| Sbragia <sup>S126</sup><br>Italy         | 01/2019         | 106   | HADS-A         | 7.02 (3.62)                     | 6.09 (4.05)                     | -0.93 (NR)   | -0.24 (-0.51, 0.03) | HADS-A > 8 | 54.0 (44.3, 63.0) | 46.0 (37.0, 55.7) | -8.0 (-19.9, 5.1)  |

|                                               |                                              |     |       |           |           |           |                 |       |       |       |       |
|-----------------------------------------------|----------------------------------------------|-----|-------|-----------|-----------|-----------|-----------------|-------|-------|-------|-------|
| Wong, S <sup>S35</sup><br>Hong Kong,<br>China | 05/2020<br>04/2018-<br>03/2019<br>03-04/2020 | 583 | GAD-7 | 2.50 (NR) | 3.00 (NR) | 0.48 (NR) | NR <sup>b</sup> | ----- | ----- | ----- | ----- |
|-----------------------------------------------|----------------------------------------------|-----|-------|-----------|-----------|-----------|-----------------|-------|-------|-------|-------|

---

**People with Pre-existing Mental Health Conditions**

---

|                                               |                                                 |       |                      |              |              |            |                      |       |       |       |       |
|-----------------------------------------------|-------------------------------------------------|-------|----------------------|--------------|--------------|------------|----------------------|-------|-------|-------|-------|
| Gentile <sup>S129</sup><br>Italy,<br>Paraguay | 10-12/2019<br>03-04/2020                        | 110   | HAM-A                | 16.60 (9.47) | 18.50 (9.68) | 1.90 (NR)  | 0.20 (-0.07, 0.46)   | ----- | ----- | ----- | ----- |
| Swerdlow <sup>S131</sup><br>USA               | 03/2017-<br>04/2020                             | 144   | MASQ-30 -<br>Anxiety | 16.01 (5.29) | 17.89 (6.80) | 1.88 (NR)  | 0.31 (0.08, 0.54)    | ----- | ----- | ----- | ----- |
| Young <sup>S132</sup><br>UK                   | 04-06/2020<br>09/2018-<br>02/2020<br>04-09/2020 | 12108 | GAD-7                | 8.78 (5.96)  | 8.48 (5.83)  | -0.30 (NR) | -0.05 (-0.08, -0.03) | ----- | ----- | ----- | ----- |

---

**Medical Staff**

---

|                                         |                          |     |       |           |           |           |                 |       |       |       |       |
|-----------------------------------------|--------------------------|-----|-------|-----------|-----------|-----------|-----------------|-------|-------|-------|-------|
| Li,<br>Weidong <sup>S133</sup><br>China | 10-11/2019<br>01-02/2020 | 385 | GAD-7 | 4.33 (NR) | 5.43 (NR) | 1.10 (NR) | NR <sup>b</sup> | ----- | ----- | ----- | ----- |
|-----------------------------------------|--------------------------|-----|-------|-----------|-----------|-----------|-----------------|-------|-------|-------|-------|

---

**Sexual or Gender Minority Individuals**

---

|                                       |                       |       |       |              |              |             |                    |       |       |       |       |
|---------------------------------------|-----------------------|-------|-------|--------------|--------------|-------------|--------------------|-------|-------|-------|-------|
| Bavinton <sup>S134</sup><br>Australia | NR/2019<br>04/2020    | 681   | GAD-7 | 4.54 (4.95)  | 4.96 (5.07)  | 0.42 (NR)   | 0.08 (-0.02, 0.19) | ----- | ----- | ----- | ----- |
| Flentje <sup>S135</sup><br>USA        | 06/2019<br>03-04/2020 | 2,282 | GAD-7 | 5.78 (5.21)  | 8.89 (6.22)  | 3.11 (5.32) | 0.54 (0.48, 0.60)  | ----- | ----- | ----- | ----- |
| Ghabrial <sup>S136</sup><br>Canada    | NR/2019<br>09-10/2020 | 780   | OASIS | 10.13 (4.70) | 10.35 (4.42) | 0.22 (NR)   | 0.05 (-0.05, 0.15) | ----- | ----- | ----- | ----- |

---

**Women or Females**


---

|                                            |            |       |                                |                           |                           |              |                    |                        |                      |                      |                      |
|--------------------------------------------|------------|-------|--------------------------------|---------------------------|---------------------------|--------------|--------------------|------------------------|----------------------|----------------------|----------------------|
| Li, Y <sup>S85</sup><br>China              | 09/2019    | 328   | ZSAS                           | EMM (SE):<br>47.50 (0.50) | EMM (SE):<br>45.70 (0.52) | NR (NR)      | NR (NR)            | -----                  | -----                | -----                | -----                |
|                                            | 03/2020    |       |                                |                           |                           |              |                    |                        |                      |                      |                      |
|                                            | NR/2018    |       |                                |                           |                           |              |                    |                        |                      |                      |                      |
| Lim <sup>S122</sup><br>USA                 |            | 295   | PROMIS Anxiety                 | 50.20 (11.50)             | 50.40 (11.10)             | 0.20 (10.10) | 0.02 (-0.14, 0.18) | -----                  | -----                | -----                | -----                |
|                                            | 04/2020    |       |                                |                           |                           |              |                    |                        |                      |                      |                      |
| Loret de<br>Mola <sup>S105</sup><br>Brazil | 01-12/2019 | 1,028 | GAD-7                          | -----                     | -----                     | -----        | -----              | GAD-7 ≥ 10             | 9.7 (8.1, 11.7)      | 25.9 (23.3,<br>28.6) | 16.2 (13.2,<br>19.1) |
|                                            | 05-07/2020 |       |                                |                           |                           |              |                    |                        |                      |                      |                      |
|                                            | NR/2019    |       |                                |                           |                           |              |                    |                        |                      |                      |                      |
| Magson <sup>S87</sup><br>Australia         |            | 126   | SCAS<br>Generalized<br>Anxiety | 5.55 (4.05)               | 6.52 (4.31)               | 0.97 (NR)    | 0.23 (-0.02, 0.48) | -----                  | -----                | -----                | -----                |
|                                            | 05/2020    |       |                                |                           |                           |              |                    |                        |                      |                      |                      |
|                                            | 02-06/2019 |       |                                |                           |                           |              |                    |                        |                      |                      |                      |
| Rentscher <sup>S29</sup><br>USA            |            | 165   | STAI-State                     | 27.50 (7.10)              | 30.60 (9.60)              | 3.10 (NR)    | 0.37 (0.15, 0.58)  | -----                  | -----                | -----                | -----                |
|                                            | 05-09/2020 |       |                                |                           |                           |              |                    |                        |                      |                      |                      |
|                                            | 02-06/2019 |       |                                |                           |                           |              |                    |                        |                      |                      |                      |
| Rentscher <sup>S29</sup><br>USA            |            | 262   | STAI-State                     | 27.90 (6.50)              | 30.10 (9.10)              | 2.20 (NR)    | 0.28 (0.11, 0.45)  | -----                  | -----                | -----                | -----                |
|                                            | 05-09/2020 |       |                                |                           |                           |              |                    |                        |                      |                      |                      |
|                                            | NR/2018    |       |                                |                           |                           |              |                    |                        |                      |                      |                      |
| Rimfeld <sup>S39</sup><br>UK               |            | 2,513 | SMGAD                          | 8.15 (7.53)               | 9.69 (7.69)               | 1.54 (7.61)  | 0.20 (0.14, 0.26)  | -----                  | -----                | -----                | -----                |
|                                            | 04-05/2020 |       |                                |                           |                           |              |                    |                        |                      |                      |                      |
|                                            | 12/2019    |       |                                |                           |                           |              |                    |                        |                      |                      |                      |
| Saraswathi <sup>S62</sup><br>India         |            | 139   | DASS-21<br>Anxiety             | 4.59 (6.29)               | 5.94 (6.93)               | 1.35 (NR)    | 0.20 (-0.03, 0.44) | DASS-21<br>Anxiety > 7 | 18.7 (13.1,<br>26.0) | 32.4 (25.2,<br>40.5) | 13.7 (4.4,<br>22.7)  |
|                                            | 06/2020    |       |                                |                           |                           |              |                    |                        |                      |                      |                      |

---

**Men or Males**


---

|                               |         |     |      |                           |                           |         |         |       |       |       |       |
|-------------------------------|---------|-----|------|---------------------------|---------------------------|---------|---------|-------|-------|-------|-------|
| Li, Y <sup>S85</sup><br>China | 09/2019 | 503 | ZSAS | EMM (SE):<br>44.70 (0.59) | EMM (SE):<br>44.80 (0.62) | NR (NR) | NR (NR) | ----- | ----- | ----- | ----- |
|-------------------------------|---------|-----|------|---------------------------|---------------------------|---------|---------|-------|-------|-------|-------|

|                                    |            |       |                                |              |               |                  |                     |                        |                      |                      |                     |
|------------------------------------|------------|-------|--------------------------------|--------------|---------------|------------------|---------------------|------------------------|----------------------|----------------------|---------------------|
|                                    | 03/2020    |       |                                |              |               |                  |                     |                        |                      |                      |                     |
|                                    | NR/2018    |       |                                |              |               |                  |                     |                        |                      |                      |                     |
| Lim <sup>S122</sup><br>USA         |            | 21    | PROMIS Anxiety                 | 50.50 (9.90) | 48.60 (11.00) | -1.90<br>(12.10) | -0.17 (-0.79, 0.45) | -----                  | -----                | -----                | -----               |
|                                    | 04/2020    |       |                                |              |               |                  |                     |                        |                      |                      |                     |
|                                    | NR/2019    |       |                                |              |               |                  |                     |                        |                      |                      |                     |
| Magson <sup>S87</sup><br>Australia |            | 122   | SCAS<br>Generalized<br>Anxiety | 3.63 (3.13)  | 3.64 (3.16)   | 0.01 (NR)        | 0.00 (-0.25, 0.25)  | -----                  | -----                | -----                | -----               |
|                                    | 05/2020    |       |                                |              |               |                  |                     |                        |                      |                      |                     |
|                                    | NR/2018    |       |                                |              |               |                  |                     |                        |                      |                      |                     |
| Rimfeld <sup>S39</sup><br>UK       |            | 1,050 | SMGAD                          | 5.88 (6.66)  | 6.30 (6.58)   | 0.42 (6.62)      | 0.06 (-0.02, 0.15)  | -----                  | -----                | -----                | -----               |
|                                    | 04-05/2020 |       |                                |              |               |                  |                     |                        |                      |                      |                     |
|                                    | 12/2019    |       |                                |              |               |                  |                     |                        |                      |                      |                     |
| Saraswathi <sup>S62</sup><br>India |            | 78    | DASS-21 Anxiety                | 4.62 (6.04)  | 6.41 (7.50)   | 1.79 (NR)        | 0.26 (-0.05, 0.57)  | DASS-21<br>Anxiety > 7 | 25.6 (17.3,<br>36.3) | 34.6 (25.0,<br>45.7) | 9.0 (-4.0,<br>21.5) |
|                                    | 06/2020    |       |                                |              |               |                  |                     |                        |                      |                      |                     |

BSI-18-Anxiety = Brief Symptom Inventory - Anxiety; DASS-21 Anxiety = Depression, Anxiety, and Stress Scale – Anxiety subscale; GAD-2 = Generalized Anxiety Disorder-2; GAD-7 = Generalized Anxiety Disorder-; HBQ = MacArthur Health and Behavior Questionnaire; SCAS = Spence Children's Anxiety Scale; SMGAD= Severity Measure for Generalized Anxiety Disorder; ZSAS = Zung Self-rating Anxiety Scale.

<sup>a</sup>Positive Hedges' g effect sizes and increases in proportions above a threshold indicate worse mental health in COVID-19 compared to pre-COVID-19. Effects for measures where high scores = positive outcomes were reversed to reflect this. <sup>b</sup>Not enough information reported to calculate. <sup>c</sup>Provided by authors. <sup>d</sup>Included because it is estimated that over 80% of pre-COVID-19 data would have been collected by December 31, 2019.

**Supplementary Table 5. Individual Study Results for Depression Symptoms**

| First Author                                      | Pre- and Post-COVID-19 Data Collection | N                                           | Continuous Outcome Measure                      | Pre-COVID-19 Mean (SD)                         | Post-COVID-19 Mean (SD)                        | Mean (SD) Change <sup>a</sup>                   | Hedges' g Standardized Mean Difference (95% CI)              | Dichotomous Outcome Measure                              | % pre-COVID-19 (95% CI)                                    | % post-COVID-19 (95% CI)                                   | % Change with 95% CI <sup>a</sup>                        |
|---------------------------------------------------|----------------------------------------|---------------------------------------------|-------------------------------------------------|------------------------------------------------|------------------------------------------------|-------------------------------------------------|--------------------------------------------------------------|----------------------------------------------------------|------------------------------------------------------------|------------------------------------------------------------|----------------------------------------------------------|
| <b>General Population</b>                         |                                        |                                             |                                                 |                                                |                                                |                                                 |                                                              |                                                          |                                                            |                                                            |                                                          |
| Ge <sup>S5</sup><br>China                         | 01-12/2019                             | 1,547-1,978                                 | PHQ-9                                           | 12.93 (2.71)                                   | 13.58 (2.46)                                   | 0.65 (NR)                                       | 0.25 (0.19, 0.31)                                            | -----                                                    | -----                                                      | -----                                                      | -----                                                    |
| Haliwa <sup>S6</sup><br>USA                       | 02-03/2020                             |                                             |                                                 |                                                |                                                |                                                 |                                                              |                                                          |                                                            |                                                            |                                                          |
|                                                   | 09-12/2019                             |                                             | Sample 1:PHQ-8                                  | Sample 1: 5.92 (5.26)                          | Sample 1: 5.79 (6.04)                          | Sample 1: -0.13 (4.09)                          | Sample 1: -0.02 (-0.18, 0.14)                                | Sample 1:PHQ-8 ≥ 10                                      | Sample 1: 21.3 (17.1, 26.3)                                | Sample 1: 27.0 (22.3, 32.3)                                | Sample 1: 5.7 (-0.2, 11.5)                               |
|                                                   | 04-06/2020                             | Sample 1: 300; Sample 2: 146; Sample 3: 142 | Sample 2: DASS-21-Depression<br>Sample 3: PHQ-8 | Sample 2: 4.81 (5.92)<br>Sample 3: 5.15 (5.81) | Sample 2: 4.79 (5.67)<br>Sample 3: 5.32 (6.08) | Sample 2: -0.02 (4.83)<br>Sample 3: 0.17 (4.13) | Sample 2: 0.00 (-0.23, 0.23)<br>Sample 3: 0.03 (-0.20, 0.26) | Sample 2: DASS-21-Depression ≥ 7<br>Sample 3: PHQ-8 ≥ 10 | Sample 2: 30.8 (23.9, 38.7)<br>Sample 3: 24.6 (18.3, 32.3) | Sample 2: 32.9 (25.8, 40.9)<br>Sample 3: 23.9 (17.7, 31.6) | Sample 2: 2.1 (-7.1, 11.2)<br>Sample 3: -0.7 (-8.6, 7.2) |
| Kanbur <sup>S7</sup><br>Turkey                    | NR/2019                                | 400                                         | SCL-90-R Depression                             | 0.33 (NR)                                      | 0.69 (NR)                                      | 0.36 (NR)                                       | NR (NR)                                                      | -----                                                    | -----                                                      | -----                                                      | -----                                                    |
| Katz, B <sup>S8</sup><br>Canada, Ireland, UK, USA | NR/2020                                |                                             |                                                 |                                                |                                                |                                                 |                                                              |                                                          |                                                            |                                                            |                                                          |
|                                                   | 04/2019                                | 218                                         | DASS-21 Depression                              | 5.85 (5.64)                                    | 6.28 (5.50)                                    | 0.43 (4.38)                                     | 0.08 (-0.11, 0.26)                                           | -----                                                    | -----                                                      | -----                                                      | -----                                                    |
| Wanberg <sup>S18</sup><br>USA                     | 04/2020                                |                                             |                                                 |                                                |                                                |                                                 |                                                              |                                                          |                                                            |                                                            |                                                          |
|                                                   | 04-06/2019                             | 1,117                                       | PHQ-8                                           | 4.18 (4.60)                                    | 4.77 (4.83)                                    | 0.59 (NR)                                       | 0.13 (0.04, 0.21)                                            | -----                                                    | -----                                                      | -----                                                      | -----                                                    |
| <b>Older Adults</b>                               |                                        |                                             |                                                 |                                                |                                                |                                                 |                                                              |                                                          |                                                            |                                                            |                                                          |
| Bartlett <sup>S19</sup><br>Australia              | 10/2019                                | 1,671                                       | HADS-D                                          | 2.07 (2.09)                                    | 2.05 (2.19)                                    | -0.02 (NR)                                      | -0.01 (-0.08, 0.06)                                          | -----                                                    | -----                                                      | -----                                                      | -----                                                    |
| Briggs <sup>S20</sup><br>Ireland                  | 04-06/2020                             |                                             |                                                 |                                                |                                                |                                                 |                                                              |                                                          |                                                            |                                                            |                                                          |
|                                                   | NR/2018                                | 3,490                                       | CES-D-8                                         | -----                                          | -----                                          | -----                                           | -----                                                        | CES-D-8 ≥ 9                                              | 5.9 (5.1, 6.8)                                             | 19.8 (18.5, 21.2)                                          | 13.9 (12.5, 15.3)                                        |

|                                                 |                     |       |          |                                  |                                 |             |                      |               |                   |                   |                   |  |
|-------------------------------------------------|---------------------|-------|----------|----------------------------------|---------------------------------|-------------|----------------------|---------------|-------------------|-------------------|-------------------|--|
|                                                 | 07-11/2020          |       |          |                                  |                                 |             |                      |               |                   |                   |                   |  |
| Creese <sup>S21</sup><br>UK                     | 10/2019             | 3,281 | PHQ-9    | 2.51 (3.29)                      | 3.07 (3.58)                     | 0.56 (NR)   | 0.16 (0.11, 0.21)    | PHQ-9 ≥ 10    | 4.1 (3.5, 5.0)    | 5.6 (4.9, 6.4)    | 1.5 (0.6, 2.3)    |  |
|                                                 | 05-06/2020          |       |          |                                  |                                 |             |                      |               |                   |                   |                   |  |
| Herrera <sup>S23</sup><br>Chile                 | 11/2019             | 721   | PHQ-9    | 4.25 (NR)                        | 5.05 (NR)                       | 0.80 (NR)   | NR (NR)              | PHQ-9 ≥ 7     | 23.8 (20.8, 27.0) | 30.2 (26.9, 33.6) | 6.4 (2.4, 10.4)   |  |
|                                                 | 09/2020             |       |          |                                  |                                 |             |                      |               |                   |                   |                   |  |
| Lee <sup>S26</sup><br>Singapore                 | 12/2017-<br>11/2019 | 496   | PHQ-9    | 0.95 (2.47)                      | 0.64 (1.49)                     | -0.31 (NR)  | -0.15 (-0.28, -0.03) | PHQ-9 ≥ 6     | 4.8 (3.3, 7.1)    | 2.2 (1.2, 3.9)    | -2.6 (-4.4, -1.3) |  |
|                                                 | 05-06/2020          |       |          |                                  |                                 |             |                      |               |                   |                   |                   |  |
| Martinez <sup>S27</sup><br>Spain                | 10/2019             | 141   | CES-D    | 11.90 (8.90)                     | 14.20 (9.10)                    | 2.30 (9.42) | 0.25 (0.02, 0.49)    | -----         | -----             | -----             | -----             |  |
|                                                 | 04/2020             |       |          |                                  |                                 |             |                      |               |                   |                   |                   |  |
| Rentscher <sup>S29</sup><br>USA                 | NR                  | 262   | CES-D    | 6.30 (7.00)                      | 8.10 (7.60)                     | 1.80 (NR)   | 0.25 (0.07, 0.42)    | -----         | -----             | -----             | -----             |  |
|                                                 | 05-09/2020          |       |          |                                  |                                 |             |                      |               |                   |                   |                   |  |
| Rentscher <sup>S29</sup><br>USA                 | NR                  | 165   | CES-D    | 4.50 (5.40)                      | 7.60 (8.00)                     | 3.10 (NR)   | 0.45 (0.23, 0.67)    | -----         | -----             | -----             | -----             |  |
|                                                 | 05-09/2020          |       |          |                                  |                                 |             |                      |               |                   |                   |                   |  |
| Uchida <sup>S128</sup><br>Japan                 | 04/2019-<br>03/2020 | 35    | CES-D-SF | Median (IQR): 8.00 (5.00, 11.00) | Median (IQR): 7.00 (6.00, 9.00) | NR (NR)     | NR (NR)              | CES-D-SF ≥ 10 | 31.4 (18.6, 48.0) | 22.9 (12.1, 39.0) | -8.6 (-23.0, 6.1) |  |
|                                                 | 07/2020-<br>03/2021 |       |          |                                  |                                 |             |                      |               |                   |                   |                   |  |
| van den Besselaar <sup>S32</sup><br>Netherlands | NR/2018-<br>2019    | 984   | CES-D-10 | 4.49 (4.05)                      | 5.92 (4.11)                     | 1.43 (NR)   | 0.35 (0.26, 0.44)    | -----         | -----             | -----             | -----             |  |
|                                                 | 06-10/2020          |       |          |                                  |                                 |             |                      |               |                   |                   |                   |  |
| Wong, S <sup>S35</sup><br>Hong Kong,<br>China   | 04/2018-<br>03/2019 | 583   | PHQ-9    | 4.40 (NR)                        | 4.50 (NR)                       | 0.19 (NR)   | NR <sup>c</sup>      | -----         | -----             | -----             | -----             |  |
|                                                 | 03-04/2020          |       |          |                                  |                                 |             |                      |               |                   |                   |                   |  |

|                                             |                                  |             |          |             |                 |             |                      |                  |                   |                   |                  |
|---------------------------------------------|----------------------------------|-------------|----------|-------------|-----------------|-------------|----------------------|------------------|-------------------|-------------------|------------------|
| Yu <sup>S36</sup><br>Singapore              | 02/2018-<br>01/2020              | 419         | GDS-15   | 1.02 (1.76) | 2.11 (2.30)     | 1.09 (2.10) | 0.53 (0.39, 0.67)    | -----            | -----             | -----             | -----            |
|                                             | 05-06/2020                       |             |          |             |                 |             |                      |                  |                   |                   |                  |
| <b>Young Adults</b>                         |                                  |             |          |             |                 |             |                      |                  |                   |                   |                  |
| Marmet <sup>S38</sup><br>Switzerland        | 04/2019-<br>02/2020 <sup>f</sup> | 2,228       | MDI      | 9.07 (7.69) | 7.60 (7.79)     | -1.47 (NR)  | -0.19 (-0.25, -0.13) | -----            | -----             | -----             | -----            |
|                                             | 05-06/2020                       |             |          |             |                 |             |                      |                  |                   |                   |                  |
| Rimfeld <sup>S39</sup><br>UK                | NR/2018                          | 3,563-3,694 | SMFQ     | 4.36 (4.07) | 4.36 (3.94)     | 0.00 (3.82) | 0.00 (-0.05, 0.05)   | -----            | -----             | -----             | -----            |
|                                             | 04-05/2020                       |             |          |             |                 |             |                      |                  |                   |                   |                  |
| Romm <sup>S40</sup><br>USA                  | 09/2019                          | 1,082       | PHQ-2    | 1.71 (1.72) | 2.10 (1.74)     | 0.38 (1.80) | 0.22 (0.14, 0.30)    | -----            | -----             | -----             | -----            |
|                                             | 03/2020                          |             |          |             |                 |             |                      |                  |                   |                   |                  |
| Watkins-<br>Martin <sup>S43</sup><br>Canada | NR/2018                          | 1,039       | CES-D-12 | 9.30 (6.42) | 9.59 (6.79)     | 0.29 (NR)   | 0.04 (-0.04, 0.13)   | CES-D-12 ≥<br>21 | 6.2 (4.9, 7.8)    | 8.1 (6.2, 9.5)    | 1.9 (0.2, 3.7)   |
|                                             | 08/2020                          |             |          |             |                 |             |                      |                  |                   |                   |                  |
| <b>University Students</b>                  |                                  |             |          |             |                 |             |                      |                  |                   |                   |                  |
| Conceição <sup>S44</sup><br>Portugal        | 10/2019                          | 341         | PHQ-9    | 9.66 (7.45) | 12.89<br>(6.99) | 3.23 (NR)   | 0.45 (0.29, 0.60)    | PHQ-9 ≥ 15       | 22.6 (18.7, 27.6) | 37.0 (32.3, 42.5) | 14.4 (8.1, 20.5) |
|                                             | 06/2020                          |             |          |             |                 |             |                      |                  |                   |                   |                  |
| Elmer <sup>S46</sup><br>Switzerland         | 09/2019                          | 209         | CES-D    | NR          | NR              | 4.44 (7.23) | 0.53 (0.33, 0.72)    | -----            | -----             | -----             | -----            |
|                                             | 04/2020                          |             |          |             |                 |             |                      |                  |                   |                   |                  |
| Evans <sup>S47</sup><br>UK                  | 10/2019                          | 259         | HADS-D   | 4.33 (3.26) | 6.31 (3.74)     | 1.97 (NR)   | 0.56 (0.38, 0.73)    | -----            | -----             | -----             | -----            |
|                                             | 05/2020                          |             |          |             |                 |             |                      |                  |                   |                   |                  |
| Fuller-Rowell <sup>S48</sup><br>USA         | 09/2018-<br>04/2019              | 263         | BDI-II   | 6.50 (7.25) | 10.75<br>(8.95) | 4.25 (NR)   | 0.52 (0.35, 0.69)    | -----            | -----             | -----             | -----            |

|                                          |                               |       |                       |                  |                  |              |                      |                  |                   |                   |                       |
|------------------------------------------|-------------------------------|-------|-----------------------|------------------|------------------|--------------|----------------------|------------------|-------------------|-------------------|-----------------------|
|                                          | 04-06/2020                    |       |                       |                  |                  |              |                      |                  |                   |                   |                       |
|                                          | 10-12/2019                    |       |                       |                  |                  |              |                      |                  |                   |                   |                       |
| Gelezelyte <sup>S49</sup><br>Lithuania   |                               | 474   | DASS-21<br>Depression | 7.88 (5.64)      | 7.26 (5.27)      | -0.62 (5.25) | -0.11 (-0.24, 0.01)  | -----            | -----             | -----             | -----                 |
|                                          | 10-12/2020                    |       |                       |                  |                  |              |                      |                  |                   |                   |                       |
|                                          | 11/2019                       |       |                       |                  |                  |              |                      |                  |                   |                   |                       |
| Gopalan <sup>S50</sup><br>USA            |                               | 1,004 | CES-D-10              | 10.34 (6.21)     | 13.12<br>(6.93)  | 2.78 (NR)    | 0.42 (0.33, 0.51)    | CES-D-10 ><br>10 | 44.2 (41.2, 47.3) | 60.9 (57.8, 63.8) | 16.6 (11.9 ,<br>21.3) |
|                                          | 05/2020                       |       |                       |                  |                  |              |                      |                  |                   |                   |                       |
|                                          | 05/2019                       |       |                       |                  |                  |              |                      |                  |                   |                   |                       |
| Hamza <sup>S51</sup><br>Canada           |                               | 733   | CES-D-R               | 17.62<br>(13.46) | 18.44<br>(13.24) | 0.82 (NR)    | 0.06 (-0.04, 0.16)   | -----            | -----             | -----             | -----                 |
|                                          | 05/2020                       |       |                       |                  |                  |              |                      |                  |                   |                   |                       |
|                                          | 01/2019-<br>01/2020           |       |                       |                  |                  |              |                      |                  |                   |                   |                       |
| Koelen <sup>S53</sup><br>Netherlands     |                               | 671   | CES-D                 | -----            | -----            | -----        | -----                | CES-D ≥ 16       | 48.7 (45.0, 52.5) | 55.3 (51.5, 59.0) | 6.6 (0.9, 12.1)       |
|                                          | 04-05/2020                    |       |                       |                  |                  |              |                      |                  |                   |                   |                       |
|                                          | 11/2019                       |       |                       |                  |                  |              |                      |                  |                   |                   |                       |
| Li, Wendy<br>Wen <sup>S56</sup><br>China |                               | 173   | DASS-21<br>Depression | 6.25 (6.15)      | 4.99 (6.15)      | -1.26 (NR)   | -0.20 (-0.41, 0.01)  | -----            | -----             | -----             | -----                 |
|                                          | 03/2020                       |       |                       |                  |                  |              |                      |                  |                   |                   |                       |
|                                          | (04-10/2018)-<br>(04-10/2019) |       |                       |                  |                  |              |                      |                  |                   |                   |                       |
| Liu <sup>S57</sup><br>China              |                               | 8079  | PHQ-9                 | 4.64 (3.39)      | 3.33 (3.90)      | -1.31 (NR)   | -0.36 (-0.39, -0.33) | PHQ-9 ≥ 10       | 6.6 (6.1, 7.2)    | 6.3 (5.7, 7.0)    | -0.3 (-0.8, 0.3)      |
|                                          |                               |       |                       |                  |                  |              |                      | CIDI 3.0         | 2.7 (2.3, 3.1)    | 2.1 (1.7, 2.5)    | -0.6 (-0.9, -0.3)     |
|                                          | 09-10/2020                    |       |                       |                  |                  |              |                      |                  |                   |                   |                       |
|                                          | 09/2019-<br>10/2019           |       |                       |                  |                  |              |                      |                  |                   |                   |                       |
| Lu <sup>S58</sup><br>China               |                               | 5,181 | PHQ-9                 | -----            | -----            | -----        | -----                | PHQ-9 ≥ 10       | 5.8 (5.1, 6.4)    | 7.2 (6.6, 8.0)    | 1.4 (0.7, 2.1)        |
|                                          | 04/2020                       |       |                       |                  |                  |              |                      |                  |                   |                   |                       |
|                                          | 08,12/2019                    |       |                       |                  |                  |              |                      |                  |                   |                   |                       |
| Mehus <sup>S60</sup><br>USA              |                               | 727   | PHQ-9                 | 5.70 (5.09)      | 6.83 (5.50)      | 1.13 (NR)    | 0.21 (0.11, 0.32)    | PHQ-9 ≥ 10       | 19.3 (16.6, 22.3) | 27.8 (24.7, 31.2) | 8.5 (4.7, 12.3)       |
|                                          | 04/2020                       |       |                       |                  |                  |              |                      |                  |                   |                   |                       |
|                                          | 09/2019                       |       |                       |                  |                  |              |                      |                  |                   |                   |                       |
| Ratner <sup>S61</sup><br>USA             |                               | 152   | BDI-II                | 0.38 (0.40)      | 0.43 (0.45)      | 0.05 (NR)    | 0.12 (-0.11, 0.34)   | -----            | -----             | -----             | -----                 |

|                                                                      |                          |                                 |                         |                                                       |                                                          |                                                       |                                                                          |                              |                   |                   |                  |
|----------------------------------------------------------------------|--------------------------|---------------------------------|-------------------------|-------------------------------------------------------|----------------------------------------------------------|-------------------------------------------------------|--------------------------------------------------------------------------|------------------------------|-------------------|-------------------|------------------|
|                                                                      | 04/2020                  |                                 |                         |                                                       |                                                          |                                                       |                                                                          |                              |                   |                   |                  |
| Saraswathi <sup>S62</sup><br>India                                   | 12/2019                  | 217                             | DASS-21<br>Depression   | 7.55 (7.86)                                           | 8.16 (8.9)                                               | 0.61 (NR)                                             | 0.07 (-0.12, 0.26)                                                       | DASS-21<br>Depression ><br>9 | 33.2 (27.3, 39.7) | 35.5 (29.4, 42.1) | 2.3 (-5.6, 10.2) |
|                                                                      | 06/2020                  |                                 |                         |                                                       |                                                          |                                                       |                                                                          |                              |                   |                   |                  |
| Shiratori <sup>S65</sup><br>Japan                                    | NR/2019                  | 6,847                           | PHQ-9                   | 2.89 (3.44)                                           | 4.05 (4.17)                                              | 1.16 (NR)                                             | 0.30 (0.27, 0.34)                                                        | PHQ-9 ≥ 10                   | 5.2 (4.7, 5.8)    | 9.8 (9.1, 10.5)   | 4.6 (3.9, 5.3)   |
|                                                                      | 06/2020                  |                                 |                         |                                                       |                                                          |                                                       |                                                                          |                              |                   |                   |                  |
| Truskauskaitė-<br>Kuneviciene <sup>S66</sup><br>Lithuania<br>Germany | 10-12/2019<br>03-04/2020 | Lithuania: 450;<br>Germany: 325 | DASS-21 -<br>Depression | Lithuania:<br>7.72 (5.66);<br>Germany:<br>5.09 (4.57) | Lithuania:<br>6.54<br>(5.18);<br>Germany:<br>4.71 (4.36) | Lithuania: -<br>1.18 (NR);<br>Germany: -<br>0.38 (NR) | Lithuania: -0.22 (-<br>0.35, -0.09);<br>Germany: -0.08 (-<br>0.24, 0.07) | -----                        | -----             | -----             | -----            |
|                                                                      | NR/2019                  |                                 |                         |                                                       |                                                          |                                                       |                                                                          |                              |                   |                   |                  |
| Voltmer <sup>S67</sup><br>Germany                                    | 06/2020                  | 588                             | BSI-18<br>Depression    | 4.80 (5.00)                                           | 4.50 (4.80)                                              | -0.30 (NR)                                            | -0.06 (-0.18, 0.05)                                                      | -----                        | -----             | -----             | -----            |
|                                                                      | 11/2019                  |                                 |                         |                                                       |                                                          |                                                       |                                                                          |                              |                   |                   |                  |
| Wang, Yitao <sup>S68</sup><br>China                                  | 06/2020                  | 2,559                           | SCL-90-R<br>Depression  | 1.55 (0.53)                                           | 1.51 (0.54)                                              | -0.04 (NR)                                            | -0.07 (-0.13, -0.02)                                                     | -----                        | -----             | -----             | -----            |
|                                                                      | 12/2018                  |                                 |                         |                                                       |                                                          |                                                       |                                                                          |                              |                   |                   |                  |
| Yang, X <sup>S69</sup><br>China                                      | 06/2020                  | 195                             | CES-D                   | 15.93 (9.97)                                          | 19.08<br>(6.63)                                          | 3.15 (NR)                                             | 0.37 (0.17, 0.57)                                                        | -----                        | -----             | -----             | -----            |
|                                                                      | 10/2019                  |                                 |                         |                                                       |                                                          |                                                       |                                                                          |                              |                   |                   |                  |
| Yang, Ziyao <sup>S70</sup><br>China                                  | 05/2020                  | 2,364                           | DASS-21<br>Depression   | 8.87 (2.62)                                           | 8.67 (2.92)                                              | -0.20 (NR)                                            | -0.07 (-0.13, -0.02)                                                     | -----                        | -----             | -----             | -----            |
|                                                                      | 08/2019                  |                                 |                         |                                                       |                                                          |                                                       |                                                                          |                              |                   |                   |                  |
| Zimmerman <sup>S71</sup><br>USA                                      | 04/2020                  | 205                             | PHQ-9                   | 8.91 (6.59)                                           | 12.09<br>(7.73)                                          | 3.19 (0.51)                                           | 0.44 (0.25, 0.64)                                                        | -----                        | -----             | -----             | -----            |

---

### Children and Adolescents

---

|                                |         |       |       |             |             |            |                      |            |                   |                 |                   |
|--------------------------------|---------|-------|-------|-------------|-------------|------------|----------------------|------------|-------------------|-----------------|-------------------|
| Adachi <sup>S73</sup><br>Japan | 09/2019 | 4,118 | PHQ-A | 4.14 (4.60) | 3.84 (4.24) | -0.30 (NR) | -0.07 (-0.11, -0.02) | PHQ-A ≥ 10 | 12.2 (11.2, 13.2) | 9.9 (9.1, 10.9) | -2.3 (-3.2, -1.3) |
|--------------------------------|---------|-------|-------|-------------|-------------|------------|----------------------|------------|-------------------|-----------------|-------------------|

|                                    |                     |           |                         |                  |                  |                                 |                      |             |                   |                   |                    |
|------------------------------------|---------------------|-----------|-------------------------|------------------|------------------|---------------------------------|----------------------|-------------|-------------------|-------------------|--------------------|
| Charmaraman <sup>S77</sup><br>USA  | 07/2020             | 586       | CESDR-10                | NR (NR)          | NR (NR)          | Change<br>estimate (B):<br>2.23 | NR (NR)              | -----       | -----             | -----             | -----              |
|                                    | NR/2019             |           |                         |                  |                  |                                 |                      |             |                   |                   |                    |
| Chen, C-Y <sup>S79</sup><br>China  | 10-12/2020          | 575       | DASS-21 -<br>Depression | 5.86 (7.89)      | 5.08 (7.38)      | -0.78 (NR)                      | -0.10 (-0.22, 0.01)  | -----       | -----             | -----             | -----              |
|                                    | 10-11/2019          |           |                         |                  |                  |                                 |                      |             |                   |                   |                    |
| Knowles <sup>S84</sup><br>UK       | 01/2020             | 958-1,055 | SMFQ                    | -----            | -----            | -----                           | -----                | SMFQ ≥ 12   | 27.8 (22.6, 33.7) | 22.6 (19.3, 26.4) | -5.1 (-8.1, -2.1)  |
|                                    | NR/2018-<br>2019    |           |                         |                  |                  |                                 |                      |             |                   |                   |                    |
| Li, Y <sup>S85</sup><br>China      | 05-08/2020          | 831       | BDI-II                  | -----            | -----            | -----                           | -----                | BDI-II > 13 | 35.4 (32.2, 38.7) | 27.8 (24.9, 30.9) | -7.6 (-11.1, -4.0) |
|                                    | 09/2019             |           |                         |                  |                  |                                 |                      |             |                   |                   |                    |
| Liao <sup>S86</sup><br>China       | 03/2020             | 2,496     | CES-DC                  | 15.10<br>(10.50) | 15.90<br>(11.10) | 0.80 (NR)                       | 0.07 (0.02, 0.13)    | -----       | -----             | -----             | -----              |
|                                    | 12/2019             |           |                         |                  |                  |                                 |                      |             |                   |                   |                    |
| Magson <sup>S87</sup><br>Australia | 07/2020             | 248       | SMFQ                    | 3.81 (4.31)      | 6.12 (6.04)      | 2.31 (5.81)                     | 0.44 (0.26, 0.62)    | -----       | -----             | -----             | -----              |
|                                    | NR/2019             |           |                         |                  |                  |                                 |                      |             |                   |                   |                    |
| Naumann <sup>S90</sup><br>Germany  | 05/2020             | 854       | STDS                    | -----            | -----            | -----                           | -----                | STDS > 25   | 10.4 (8.4, 12.5)  | 25.3 (22.4, 28.2) | 14.9 (11.7, 18.1)  |
|                                    | 11/2018-<br>07/2019 |           |                         |                  |                  |                                 |                      |             |                   |                   |                    |
| Polack <sup>S92</sup><br>USA       | 05/2020-<br>07/2020 | 112       | CDI-S                   | 2.85 (3.14)      | 3.96 (3.79)      | 1.11 (2.77)                     | 0.32 (0.06, 0.58)    | -----       | -----             | -----             | -----              |
|                                    | 01-09/2019          |           |                         |                  |                  |                                 |                      |             |                   |                   |                    |
| Rau <sup>S93</sup><br>Germany      | 03-06/2020          | 777       | RCADS -<br>Depression   | 6.27 (5.30)      | 5.41 (5.35)      | -0.86 (NR)                      | -0.16 (-0.26, -0.06) | -----       | -----             | -----             | -----              |
|                                    | 10-11/2019          |           |                         |                  |                  |                                 |                      |             |                   |                   |                    |
|                                    | 06-07/2020          |           |                         |                  |                  |                                 |                      |             |                   |                   |                    |

|                                             |            |       |                         |                  |                  |              |                      |            |                   |                   |                  |
|---------------------------------------------|------------|-------|-------------------------|------------------|------------------|--------------|----------------------|------------|-------------------|-------------------|------------------|
| Shoshani <sup>S94</sup><br>Israel           | 09/2019    | 1,537 | BSI-18 -<br>Depression  | 6.14 (4.73)      | 7.59 (5.25)      | 1.45 (NR)    | 0.29 (0.22, 0.36)    | -----      | -----             | -----             | -----            |
|                                             | 05/2020    |       |                         |                  |                  |              |                      |            |                   |                   |                  |
| Teng <sup>S95</sup><br>China                | 10-11/2019 | 1,778 | CES-D                   | 0.81 (0.59)      | 0.83 (0.60)      | 0.02 (NR)    | 0.03 (-0.03, 0.10)   | -----      | -----             | -----             | -----            |
|                                             | 04-05/2020 |       |                         |                  |                  |              |                      |            |                   |                   |                  |
| Wang,<br>Wanxin <sup>S97</sup><br>China     | 10-12/2019 | 1,790 | CES-D                   | 13.69<br>(10.53) | 13.44<br>(10.28) | -0.25 (NR)   | -0.02 (-0.09, 0.04)  | CES-D ≥ 16 | 30.0 (27.9, 32.2) | 29.2 (27.1, 31.4) | -0.8 (-3.3, 1.7) |
|                                             | 10-12/2020 |       |                         |                  |                  |              |                      |            |                   |                   |                  |
| Wong, R <sup>S99</sup><br>China             | 04-08/2019 | 233   | DASS-21 -<br>Depression | NR (NR)          | NR (NR)          | 0.84 (6.22)  | NR (NR)              | -----      | -----             | -----             | -----            |
|                                             | 02/2020    |       |                         |                  |                  |              |                      |            |                   |                   |                  |
| Yang,<br>Zhengqian <sup>S100</sup><br>China | 11/2019    | 1,125 | CES-D                   | 0.94 (0.63)      | 0.75 (0.64)      | -0.19 (NR)   | -0.30 (-0.38, -0.22) | -----      | -----             | -----             | -----            |
|                                             | 08/2020    |       |                         |                  |                  |              |                      |            |                   |                   |                  |
| Zhang <sup>S101</sup><br>China              | 11/2019    | 1,241 | MFQ                     | 16.6 (12.20)     | 17.7<br>(14.40)  | 1.49 (11.41) | 0.11 (0.03, 0.19)    | -----      | -----             | -----             | -----            |
|                                             | 05/2020    |       |                         |                  |                  |              |                      |            |                   |                   |                  |

---

**Parents**


---

|                                            |                     |       |       |             |             |           |                    |           |                |                   |                   |
|--------------------------------------------|---------------------|-------|-------|-------------|-------------|-----------|--------------------|-----------|----------------|-------------------|-------------------|
| Adesogan <sup>S102</sup><br>USA            | NR/2018-<br>03/2020 | 329   | CES-D | 6.56 (4.22) | 8.22 (5.52) | 1.66 (NR) | 0.34 (0.18, 0.49)  | -----     | -----          | -----             | -----             |
|                                            | 06-09/2020          |       |       |             |             |           |                    |           |                |                   |                   |
| Frank <sup>S103</sup><br>USA               | 08/2018             | 180   | PHQ-9 | 3.65 (5.77) | 4.33 (6.24) | 0.68 (NR) | 0.11 (-0.09, 0.32) | -----     | -----          | -----             | -----             |
|                                            | 08/2020             |       |       |             |             |           |                    |           |                |                   |                   |
| Loret de<br>Mola <sup>S105</sup><br>Brazil | 01-12/2019          | 1,042 | EPDS  | -----       | -----       | -----     | -----              | EPDS ≥ 13 | 5.1 (3.8, 6.5) | 29.5 (26.6, 32.1) | 24.4 (21.3, 27.2) |
|                                            | 05-07/2020          |       |       |             |             |           |                    |           |                |                   |                   |

|                                       |                                       |     |       |               |               |              |                     |          |                   |                   |                  |
|---------------------------------------|---------------------------------------|-----|-------|---------------|---------------|--------------|---------------------|----------|-------------------|-------------------|------------------|
| Pitchik <sup>S106</sup><br>Bangladesh | 05-06/2019                            | 517 | CES-D | 13.40 (8.70)  | 12.80 (9.20)  | -0.60 (NR)   | -0.07 (-0.19, 0.05) | -----    | -----             | -----             | -----            |
| Rivera <sup>S107</sup><br>Mexico      | 07-09/2020<br>NR/2018-2019            | 466 | EDS   | 7.48 (5.80)   | 7.34 (5.83)   | -0.14 (NR)   | -0.02 (-0.15, 0.10) | EDS > 12 | 19.5 (16.4, 23.6) | 19.1 (16.0, 23.1) | -0.4 (-4.4, 3.5) |
| Thompson <sup>S108</sup><br>USA       | 05-11/2020<br>NR/2018-2019<br>04/2020 | 147 | CES-D | 14.22 (10.13) | 19.28 (11.74) | 5.06 (13.08) | 0.46 (0.23, 0.69)   | -----    | -----             | -----             | -----            |

---

**People with Pre-existing Medical Conditions**

---

|                                        |                            |       |                     |                           |                           |              |                      |            |                |                |                |
|----------------------------------------|----------------------------|-------|---------------------|---------------------------|---------------------------|--------------|----------------------|------------|----------------|----------------|----------------|
| Becker <sup>S109</sup><br>USA          | 03/2019                    | 121   | CESD-10             | 8.40 (5.50)               | 9.10 (5.60)               | 0.70 (NR)    | 0.13 (-0.13, 0.38)   | -----      | -----          | -----          | -----          |
| Chao <sup>S111</sup><br>USA            | 03/2020<br>02/2018-02/2020 | 2,679 | PHQ-8               | 2.50 (3.30)               | 3.50 (4.00)               | 1.00 (NR)    | 0.27 (0.22, 0.33)    | PHQ-8 ≥ 10 | 4.6 (3.8, 5.5) | 8.5 (7.4, 9.6) | 3.9 (2.8, 5.0) |
| Chiu <sup>S112</sup><br>USA            | 07-12/2020<br>10/2018      | 133   | HADS-D              | 4.61 (3.65)               | 5.82 (3.85)               | 1.21 (3.50)  | 0.32 (0.08, 0.56)    | -----      | -----          | -----          | -----          |
| Derksen <sup>S113</sup><br>Netherlands | 09/2020<br>01/2019-01/2020 | 2176  | HADS-D              | 2.98 (3.22)               | 2.78 (3.10)               | -0.20 (3.20) | -0.06 (-0.12, 0.00)  | -----      | -----          | -----          | -----          |
| Dunlop-Thomas <sup>S114</sup><br>USA   | 04-06/2020<br>NR/2017-2019 | 852   | PROMIS - Depression | 51.40 (10.65)             | 49.80 (9.87)              | -1.60 (NR)   | -0.16 (-0.25, -0.06) | -----      | -----          | -----          | -----          |
| Fujiwara <sup>S115</sup><br>Japan      | NR/2020-2021<br>07-09/2019 | 245   | HADS-D              | Median (IQR): 7.00 (6.00) | Median (IQR): 7.00 (6.00) | NR (NR)      | NR (NR)              | -----      | -----          | -----          | -----          |

|                                                     |                     |       |                      |                                 |                |              |                      |            |                   |                   |                    |
|-----------------------------------------------------|---------------------|-------|----------------------|---------------------------------|----------------|--------------|----------------------|------------|-------------------|-------------------|--------------------|
|                                                     | 07-09/2020          |       |                      |                                 |                |              |                      |            |                   |                   |                    |
| García-Rudolph <sup>S116</sup><br>Spain             | NR                  | 175   | HADS-D               | 4.63 (4.25)                     | 5.73 (4.95)    | 1.10 (NR)    | 0.24 (0.03, 0.45)    | -----      | -----             | -----             | -----              |
|                                                     | 11/2020             |       |                      |                                 |                |              |                      |            |                   |                   |                    |
| Gül <sup>S117</sup><br>Turkey                       | 10-11/2019          | 116   | BDI                  | 11.53 (9.40)                    | 12.54 (11.30)  | 1.01 (NR)    | 0.10 (-0.16, 0.35)   | BDI ≥ 19   | 17.2 (11.5, 25.1) | 23.3 (16.5, 31.8) | 6.0 (-2.8, 14.8)   |
|                                                     | 06-07/2020          |       |                      |                                 |                |              |                      |            |                   |                   |                    |
|                                                     | 07-12/2019          |       |                      |                                 |                |              |                      |            |                   |                   |                    |
| Henry <sup>S118</sup><br>Canada, France,<br>UK, USA | 04/2020             | 388   | PHQ-8                | 6.73 (5.73)                     | 6.44 (5.44)    | -0.29 (NR)   | -0.05 (-0.19, 0.09)  | -----      | -----             | -----             | -----              |
|                                                     | 09-10/2020          |       |                      | 6.73 (5.73)                     | 5.59 (5.05)    | -1.14 (NR)   | -0.21 (-0.35, -0.07) |            |                   |                   |                    |
|                                                     | 03/2021             |       |                      | 6.73 (5.73)                     | 5.60 (5.28)    | -1.13 (NR)   | -0.20 (-0.35, -0.06) |            |                   |                   |                    |
| Johnstone <sup>S119</sup><br>New Zealand            | NR/2018             | 104   | HADS-D               | 3.82 (3.12)                     | 3.80 (3.39)    | -0.02 (NR)   | -0.01 (-0.28, 0.26)  | -----      | -----             | -----             | -----              |
|                                                     | 07-09/2020          |       |                      |                                 |                |              |                      |            |                   |                   |                    |
| Katz, P <sup>S120</sup><br>USA                      | NR/2019             | 1,504 | PHQ-2                | 0.79 (1.25)                     | 0.84 (1.24)    | 0.05 (NR)    | 0.04 (-0.03, 0.11)   | -----      | -----             | -----             | -----              |
|                                                     | 03-06/2020          |       |                      |                                 |                |              |                      |            |                   |                   |                    |
| Liang <sup>S121</sup><br>China                      | 12/2019             | 114   | ZSDS                 | 37.70 (9.10)                    | 37.40 (9.50)   | -0.3 (NR)    | -0.03 (-0.31, 0.24)  | -----      | -----             | -----             | -----              |
|                                                     | 02-03/2020          |       |                      |                                 |                |              |                      |            |                   |                   |                    |
| Lim <sup>S122</sup><br>USA                          | NR/2018             | 316   | PROMIS<br>Depression | 50.80 (10.50)                   | 49.30 (9.80)   | -1.50 (9.20) | -0.15 (-0.30, 0.01)  | -----      | -----             | -----             | -----              |
|                                                     | 04/2020             |       |                      |                                 |                |              |                      |            |                   |                   |                    |
| Park <sup>S124</sup><br>Germany                     | 09/2019–<br>02/2020 | 152   | HADS-D               | Median (IQR): 5.00 (2.00, 7.00) | Mediana (IQR): | NR (NR)      | NR (NR)              | HADS-D ≥ 8 | 13.0 (8.7, 19.5)  | 8.0 (4.6, 13.3)   | -5.3 (-10.3, -0.8) |

|                                            |                                    |        |          |                                  |                                  |                 |                      |               |                   |                   |                   |
|--------------------------------------------|------------------------------------|--------|----------|----------------------------------|----------------------------------|-----------------|----------------------|---------------|-------------------|-------------------|-------------------|
|                                            | 05-08/2020                         |        |          |                                  | 4.00 (2.00, 7.00)                |                 |                      |               |                   |                   |                   |
| Rentscher <sup>S29</sup><br>USA            | NR                                 | 262    | CES-D    | 6.30 (7.00)                      | 8.10 (7.60)                      | 1.80 (NR)       | 0.25 (0.07, 0.42)    | -----         | -----             | -----             | -----             |
| Sacre <sup>S125</sup><br>Australia         | 05-09/2020<br>NR/2018-2019         | 450    | PHQ-8    | 4.10 (4.70)                      | 4.10 (4.70)                      | 0.00 (NR)       | 0.00 (-0.13, 0.13)   | PHQ-8 ≥ 10    | 5.3 (3.6, 7.8)    | 5.6 (3.8, 8.1)    | 0.3 (-2.1, 2.5)   |
| Sbragia <sup>S126</sup><br>Italy           | 05-06/2020<br>01/2019              | 106    | HADS-D   | 5.93 (3.77)                      | 5.51 (3.93)                      | -0.42 (NR)      | -0.11 (-0.38, 0.16)  | HADS-D > 8    | 38.1 (29.1, 47.2) | 34.0 (25.7, 43.4) | -3.8 (-14.6, 7.2) |
| Ubara <sup>S127</sup><br>Japan             | 05/2020<br>04-07/2019              | 164    | PHQ-9    | Median (IQR): 2.00 (1.00-5.00)   | Median (IQR): 3.00 (0.25-6.00)   | NR <sup>c</sup> | NR <sup>c</sup>      | -----         | -----             | -----             | -----             |
| Uchida <sup>S128</sup><br>Japan            | 05/2020<br>04/2019-03/2020         | 142    | CES-D-SF | Median (IQR): 6.00 (4.80, 10.00) | Median (IQR): 7.00 (5.00, 10.00) | NR (NR)         | NR (NR)              | CES-D-SF ≥ 10 | 26.1 (19.5, 33.8) | 26.1 (19.5, 33.8) | 0.0 (-8.3, 8.3)   |
| Wong, S <sup>S35</sup><br>Hong Kong, China | 07/2020-03/2021<br>04/2018-03/2019 | 583    | PHQ-9    | 4.40 (NR)                        | 4.50 (NR)                        | 0.19 (NR)       | NR <sup>c</sup>      | -----         | -----             | -----             | -----             |
| Young <sup>S132</sup><br>UK                | 03-04/2020<br>09/2018-02/2020      | 12,098 | PHQ-9    | 11.18 (6.86)                     | 10.80 (6.68)                     | -0.38 (NR)      | -0.06 (-0.08, -0.03) | -----         | -----             | -----             | -----             |
|                                            | 04-09/2020                         |        |          |                                  |                                  |                 |                      |               |                   |                   |                   |

---

### People with Pre-existing Mental Health Conditions

---

|                                            |                               |     |                      |              |              |            |                     |       |       |       |       |
|--------------------------------------------|-------------------------------|-----|----------------------|--------------|--------------|------------|---------------------|-------|-------|-------|-------|
| Gentile <sup>S129</sup><br>Italy, Paraguay | 10-12/2019                    | 110 | HAM-D                | 11.40 (7.26) | 11.90 (7.56) | 0.50 (NR)  | 0.07 (-0.20, 0.33)  | ----- | ----- | ----- | ----- |
| Swerdlow <sup>S131</sup><br>USA            | 03-04/2020<br>NR/2018-04/2020 | 144 | MASQ-30 - Depression | 35.99 (6.83) | 35.74 (7.36) | -0.25 (NR) | -0.04 (-0.26, 0.19) | ----- | ----- | ----- | ----- |

|                             |                                   |        |       |              |                 |            |                      |       |       |       |       |
|-----------------------------|-----------------------------------|--------|-------|--------------|-----------------|------------|----------------------|-------|-------|-------|-------|
| Young <sup>S132</sup><br>UK | 04-06/2020<br>09/2018-<br>02/2020 | 12,098 | PHQ-9 | 11.18 (6.86) | 10.80<br>(6.68) | -0.38 (NR) | -0.06 (-0.08, -0.03) | ----- | ----- | ----- | ----- |
|                             | 04-09/2020                        |        |       |              |                 |            |                      |       |       |       |       |

---

**Medical Staff**


---

|                                      |                       |     |       |             |             |           |                    |       |       |       |       |
|--------------------------------------|-----------------------|-----|-------|-------------|-------------|-----------|--------------------|-------|-------|-------|-------|
| Frank <sup>S103</sup><br>USA         | 08/2018               | 180 | PHQ-9 | 3.65 (5.77) | 4.33 (6.24) | 0.68 (NR) | 0.11 (-0.09, 0.32) | ----- | ----- | ----- | ----- |
| Li, Weidong <sup>S133</sup><br>China | 08/2020<br>10-11/2019 | 385 | PHQ-9 | 5.17 (NR)   | 5.77 (NR)   | 0.60 (NR) | NR <sup>c</sup>    | ----- | ----- | ----- | ----- |
|                                      | 01-02/2020            |     |       |             |             |           |                    |       |       |       |       |

---

**Sexual or Gender Minority Individuals**


---

|                                       |                       |       |       |              |                 |             |                    |       |       |       |       |
|---------------------------------------|-----------------------|-------|-------|--------------|-----------------|-------------|--------------------|-------|-------|-------|-------|
| Bavinton <sup>S134</sup><br>Australia | NR/2019               | 681   | PHQ-9 | 5.98 (5.93)  | 6.56 (6.03)     | 0.58 (NR)   | 0.10 (-0.01, 0.20) | ----- | ----- | ----- | ----- |
| Flentje <sup>S135</sup><br>USA        | 04/2020<br>06/2019    | 2,280 | PHQ-9 | 7.10 (5.99)  | 8.31 (6.43)     | 1.21 (5.10) | 0.19 (0.14, 0.25)  | ----- | ----- | ----- | ----- |
| Ghabrial <sup>S136</sup><br>Canada    | 03-04/2020<br>NR/2019 | 780   | CES-D | 14.47 (7.69) | 16.50<br>(7.34) | 2.03 (NR)   | 0.27 (0.17, 0.37)  | ----- | ----- | ----- | ----- |
|                                       | 09-10/2020            |       |       |              |                 |             |                    |       |       |       |       |

---

**Women or Females**


---

|                                 |                       |     |       |             |             |           |                    |       |       |       |       |
|---------------------------------|-----------------------|-----|-------|-------------|-------------|-----------|--------------------|-------|-------|-------|-------|
| Adesogan <sup>S102</sup><br>USA | NR/2018-<br>03/2020   | 191 | CES-D | 6.82 (4.70) | 9.23 (5.77) | 2.41 (NR) | 0.46 (0.25, 0.66)  | ----- | ----- | ----- | ----- |
| Frank <sup>S103</sup>           | 06-09/2020<br>08/2018 | 95  | PHQ-9 | 3.69 (5.26) | 5.05 (6.64) | 1.36 (NR) | 0.23 (-0.06, 0.51) | ----- | ----- | ----- | ----- |

USA

|                                            |                     |       |                       |                                       |                                 |              |                     |                              |                   |                   |                   |
|--------------------------------------------|---------------------|-------|-----------------------|---------------------------------------|---------------------------------|--------------|---------------------|------------------------------|-------------------|-------------------|-------------------|
|                                            | 08/2020             |       |                       |                                       |                                 |              |                     |                              |                   |                   |                   |
| Li, Y <sup>S85</sup><br>China              | 09/2019             | 328   | BDI-II                | EMM (SE):<br>13.02 (0.54)             | EMM<br>(SE):<br>10.77<br>(0.55) | NR (NR)      | NR (NR)             | -----                        | -----             | -----             | -----             |
|                                            | 03/2020             |       |                       |                                       |                                 |              |                     |                              |                   |                   |                   |
| Lim <sup>S122</sup><br>USA                 | NR/2018             | 295   | PROMIS<br>Depression  | 50.80<br>(10.70)                      | 49.30<br>(9.80)                 | -1.50 (9.30) | -0.15 (-0.31, 0.02) | -----                        | -----             | -----             | -----             |
|                                            | 04/2020             |       |                       |                                       |                                 |              |                     |                              |                   |                   |                   |
| Loret de<br>Mola <sup>S105</sup><br>Brazil | 01-12/2019          | 1,042 | EPDS                  | -----                                 | -----                           | -----        | -----               | EPDS ≥ 13                    | 5.1 (3.8, 6.5)    | 29.5 (26.6, 32.1) | 24.4 (21.3, 27.2) |
|                                            | 05-07/2020          |       |                       |                                       |                                 |              |                     |                              |                   |                   |                   |
| Magson <sup>S87</sup><br>Australia         | NR/2019             | 126   | SMFQ                  | 4.77 (5.00)                           | 8.16 (6.46)                     | 3.39 (NR)    | 0.58 (0.33, 0.83)   | -----                        | -----             | -----             | -----             |
|                                            | 05/2020             |       |                       |                                       |                                 |              |                     |                              |                   |                   |                   |
| Rentscher <sup>S29</sup><br>USA            | NR                  | 165   | CES-D                 | 4.50 (5.40)                           | 7.60 (8.00)                     | 3.10 (NR)    | 0.45 (0.23, 0.67)   | -----                        | -----             | -----             | -----             |
|                                            | 05-09/2020          |       |                       |                                       |                                 |              |                     |                              |                   |                   |                   |
| Rentscher <sup>S29</sup><br>USA            | NR                  | 262   | CES-D                 | 6.30 (7.00)                           | 8.10 (7.60)                     | 1.80 (NR)    | 0.25 (0.07, 0.42)   | -----                        | -----             | -----             | -----             |
|                                            | 05-09/2020          |       |                       |                                       |                                 |              |                     |                              |                   |                   |                   |
| Rimfeld <sup>S39</sup><br>UK               | NR/2018             | 2,578 | SMFQ                  | 4.65 (4.20)                           | 4.81 (4.07)                     | 0.16 (4.14)  | 0.04 (-0.02, 0.09)  | -----                        | -----             | -----             | -----             |
|                                            | 04-05/2020          |       |                       |                                       |                                 |              |                     |                              |                   |                   |                   |
| Saraswathi <sup>S62</sup><br>India         | 12/2019             | 139   | DASS-21<br>Depression | 7.71 (7.57)                           | 7.94 (8.77)                     | 0.23 (NR)    | 0.03 (-0.21, 0.26)  | DASS-21<br>Depression ><br>9 | 36.7 (29.1, 45.0) | 34.5 (27.1, 42.8) | -2.2 (-11.7, 7.4) |
|                                            | 06/2020             |       |                       |                                       |                                 |              |                     |                              |                   |                   |                   |
| Uchida <sup>S128</sup><br>Japan            | 04/2019-<br>03/2020 | 60    | CES-D-SF              | Median<br>(IQR): 7.00<br>(5.00, 9.00) | Median<br>(IQR):                | NR (NR)      | NR (NR)             | CES-D-SF ≥<br>10             | 23.3 (14.4, 35.4) | 28.3 (18.5, 40.8) | 5.0 (-8.4, 18.2)  |

07/2020-03/2021

7.00 (5.00, 10.00)

**Men or Males**

|                                      |                 |       |                       |                                        |                             |              |                      |                              |                   |                   |                   |
|--------------------------------------|-----------------|-------|-----------------------|----------------------------------------|-----------------------------|--------------|----------------------|------------------------------|-------------------|-------------------|-------------------|
| Adesogan <sup>S102</sup><br>USA      | NR/2018-03/2020 | 138   | CES-D                 | 6.20 (3.46)                            | 6.86 (5.17)                 | 0.66 (NR)    | 0.15 (-0.09, 0.38)   | -----                        | -----             | -----             | -----             |
|                                      | 06-09/2020      |       |                       |                                        |                             |              |                      |                              |                   |                   |                   |
| Frank <sup>S103</sup><br>USA         | 08/2018         | 85    | PHQ-9                 | 3.60 (6.30)                            | 3.52 (5.75)                 | -0.08 (NR)   | -0.01 (-0.32, 0.29)  | -----                        | -----             | -----             | -----             |
|                                      | 08/2020         |       |                       |                                        |                             |              |                      |                              |                   |                   |                   |
| Li, Y <sup>S85</sup><br>China        | 09/2019         | 503   | BDI-II                | EMM (SE):<br>9.25 (0.63)               | EMM<br>(SE): 7.87<br>(0.66) | NR (NR)      | NR (NR)              | -----                        | -----             | -----             | -----             |
|                                      | 03/2020         |       |                       |                                        |                             |              |                      |                              |                   |                   |                   |
| Lim <sup>S122</sup><br>USA           | NR/2018         | 21    | PROMIS<br>Depression  | 50.70 (8.60)                           | 49.90<br>(9.70)             | -0.80 (8.20) | -0.08 (-0.70, 0.54)  | -----                        | -----             | -----             | -----             |
|                                      | 04/2020         |       |                       |                                        |                             |              |                      |                              |                   |                   |                   |
| Magson <sup>S87</sup><br>Australia   | NR/2019         | 122   | SMFQ                  | 2.81 (3.18)                            | 4.02 (4.76)                 | 1.21 (NR)    | 0.30 (0.05, 0.55)    | -----                        | -----             | -----             | -----             |
|                                      | 05/2020         |       |                       |                                        |                             |              |                      |                              |                   |                   |                   |
| Marmet <sup>S38</sup><br>Switzerland | 04/2019-02/2020 | 2,345 | MDI                   | 9.07 (7.69)                            | 7.60 (7.79)                 | -1.47 (NR)   | -0.19 (-0.25, -0.13) | -----                        | -----             | -----             | -----             |
|                                      | 05-06/2020      |       |                       |                                        |                             |              |                      |                              |                   |                   |                   |
| Rimfeld <sup>S39</sup><br>UK         | NR/2018         | 1,116 | SMFQ                  | 3.71 (3.70)                            | 3.33 (3.40)                 | -0.38 (3.55) | -0.11 (-0.19, -0.02) | -----                        | -----             | -----             | -----             |
|                                      | 04-05/2020      |       |                       |                                        |                             |              |                      |                              |                   |                   |                   |
| Saraswathi <sup>S62</sup><br>India   | 12/2019         | 78    | DASS-21<br>Depression | 7.28 (8.40)                            | 8.54 (9.17)                 | 1.26 (NR)    | 0.14 (-0.17, 0.45)   | DASS-21<br>Depression ><br>9 | 26.9 (18.3, 37.7) | 37.2 (27.3, 48.3) | 10.3 (-2.9, 22.9) |
|                                      | 06/2020         |       |                       |                                        |                             |              |                      |                              |                   |                   |                   |
| Uchida <sup>S128</sup><br>Japan      | 04/2019-03/2020 | 82    | CES-D-SF              | Median<br>(IQR): 6.00<br>(4.00, 10.00) | Median<br>(IQR):            | NR (NR)      | NR (NR)              | CES-D-SF ≥<br>10             | 28.1 (19.5, 38.6) | 24.4 (16.4, 34.7) | -3.7 (-14.0, 6.7) |

07/2020-  
03/2021

7.00 (4.80,  
9.30)

---

**Immigrants**

---

04/2018-  
NR/2019

Gosselin<sup>S137</sup>  
France

100

PHQ-9

-----

-----

-----

-----

PHQ-9 ≥ 10

65.0 (55.3, 73.6)

72.0 (62.5, 79.9)

7.0 (-9.4, 23.0)

06/2020

---

BSI-18-Depression = Brief Symptom Inventory - Depression; CES-D= Center for Epidemiologic Studies Depression Scale; DASS-21 Depression = Depression, Anxiety, and Stress Scale – Depression subscale; MDI= Major Depression Inventory; MFQ = Mood and Feelings Questionnaire; PHQ-2 = Patient Health Questionnaire-2; PHQ-8 = Patient Health Questionnaire-8; PHQ-9 = Patient Health Questionnaire-9; SMFQ = Short Mood and Feelings Questionnaire; ZSDS= Zung Self-rating Depression Scale.

<sup>a</sup>Positive Hedges' g effect sizes and increases in proportions above a threshold indicate worse mental health in COVID-19 compared to pre-COVID-19. Effects for measures where high scores = positive outcomes were reversed to reflect this. <sup>b</sup>Not enough information reported to calculate. <sup>c</sup>Provided by authors. <sup>d</sup>Included because it is estimated that over 80% of pre-COVID-19 data would have been collected by December 31, 2019.

**Supplementary Figure 1a.** Forest plot of standardized mean difference change in general mental health for studies of the general population





**Supplementary Figure 1c.** Forest plot of standardized mean difference change in general mental health for studies of men or males



**Supplementary Figure 1d.** Forest plot of standardized mean difference change in general mental health for studies of older adults



**Supplementary Figure 1e.** Forest plot of standardized mean difference change in general mental health for studies of young adults



**Supplementary Figure 1f.** Forest plot of standardized mean difference change in general mental health for studies of university students



**Supplementary Figure 1g.** Forest plot of standardized mean difference change in general mental health for studies of children and adolescents



**Supplementary Figure 1h.** Forest plot of standardized mean difference change in general mental health for studies of parents



**Supplementary Figure 1i.** Forest plot of standardized mean difference change in general mental health for studies of people with pre-existing medical conditions



**Supplementary Figure 1j.** Forest plot of standardized mean difference change in general mental health for studies of people with pre-existing mental health conditions





**Supplementary Figure 2a.** Forest plot of standardized mean difference change in anxiety symptoms for studies of the general population



**Supplementary Figure 2b.** Forest plot of standardized mean difference change in anxiety symptoms for studies of women or females



**Supplementary Figure 2c.** Forest plot of standardized mean difference change in anxiety symptoms for studies of men or males



**Supplementary Figure 2d.** Forest plot of standardized mean difference change in anxiety symptoms for studies of older adults



**Supplementary Figure 2e.** Forest plot of standardized mean difference change in anxiety symptoms for studies of young adults



**Supplementary Figure 2f.** Forest plot of standardized mean difference change in anxiety symptoms for studies of university students



**Supplementary Figure 2g.** Forest plot of standardized mean difference change in anxiety symptoms for studies of children and adolescents



**Supplementary Figure 2h.** Forest plot of standardized mean difference change in anxiety symptoms for studies of people with pre-existing medical conditions



**Supplementary Figure 2i.** Forest plot of standardized mean difference change in anxiety symptoms for studies of people with pre-existing mental health conditions



**Supplementary Figure 2j.** Forest plot of standardized mean difference change in anxiety symptoms for studies of sexual or gender minorities



**Supplementary Figure 2k.** Sensitivity analysis of standardized mean difference change in anxiety symptoms among people with pre-existing medical conditions conducted with results from Henry et al. from September to October 2020 instead of April 2020



**Supplementary Figure 2I.** Sensitivity analysis of standardized mean difference change in anxiety symptoms among people with pre-existing medical conditions conducted with results from Henry et al. from March 2021 instead of April 2020



**Supplementary Figure 3a.** Forest plot of standardized mean difference change in depression symptoms for studies of the general population



**Supplementary Figure 3b.** Forest plot of standardized mean difference change in depression symptoms for studies of women or females



**Supplementary Figure 3c.** Forest plot of standardized mean difference change in depression symptoms for studies of men or males



**Supplementary Figure 3d.** Forest plot of standardized mean difference change in depression symptoms for studies of older adults



**Supplementary Figure 3e.** Forest plot of standardized mean difference change in depression symptoms for studies of young adults



**Supplementary Figure 3f.** Forest plot of standardized mean difference change in depression symptoms for studies of university students



**Supplementary Figure 3g.** Forest plot of standardized mean difference change in depression symptoms for studies of children and adolescents



**Supplementary Figure 3h.** Forest plot of standardized mean difference change in depression symptoms for studies of parents



**Supplementary Figure 3i.** Forest plot of standardized mean difference change in depression symptoms for studies of people with pre-existing medical conditions



**Supplementary Figure 3j.** Forest plot of standardized mean difference change in depression symptoms for studies of people with pre-existing mental health conditions



**Supplementary Figure 3k.** Forest plot of standardized mean difference change in depression symptoms for studies of sexual or gender minorities





**Supplementary Figure 3m.** Sensitivity analysis of standardized mean difference change in depression symptoms among people with pre-existing medical conditions conducted with results from Henry et al. from March 2021 instead of April 2020



## References for Included Studies

- S1. Bulbulia J, Piven S, Greaves L, et al. Longitudinal study of pandemic and natural disaster distress. *PsyArXiv* 20201123 [Preprint]. <https://psyarxiv.com/erfhp/>.
- S2. Castellini G, Rossi E, Cassioli E, et al. A longitudinal observation of general psychopathology before the COVID-19 outbreak and during lockdown in Italy. *J Psychosom Res* 2021;141:110328. <https://doi.org/10.1016/j.jpsychores.2020.110328>.
- S3. Chan F, Tao TJ, Jin J, et al. The impact of interpretation biases on psychological responses to the COVID-19 pandemic: a prospective study. *Int J Behav Med* 2022. <https://doi.org/10.1007/s12529-022-10079-5>.
- S4. Finucane ML, Beckman R, Ghosh-Dastidar M, et al. Do social isolation and neighborhood walkability influence relationships between COVID-19 experiences and wellbeing in predominantly Black urban areas? *Landsc Urban Plan* 2022;217:104264. <https://doi.org/10.1016/j.landurbplan.2021.104264>.
- S5. Ge F, Zheng A, Wan M, et al. Psychological state among the general Chinese population before and during the COVID-19 epidemic: a network analysis. *Front Psychiatry* 2021;12:591656. <https://doi.org/10.3389/fpsy.2021.591656>.
- S6. Haliwa I, Wilson J, Lee J, et al. Predictors of change in mental health during the COVID-19 pandemic. *J Affect Disord* 2021;291:331-337. <https://doi.org/10.1016/j.jad.2021.05.045>.
- S7. Kanbur S. Investigation of the effect of COVID-19 pandemic on employees' psychological symptoms and nutritional habits. *Progress in Nutrition* 2021;23:e2021107. doi:10.23751/pn.v23i1.11052.
- S8. Katz BA, Yovel I. Mood symptoms predict COVID-19 pandemic distress but not vice versa: an 18-month longitudinal study. *PLoS One* 2022;17:e0273945. <https://doi.org/10.1371/journal.pone.0273945>.

- S9. Latikka R, Koivula A, Oksa R, et al. Loneliness and psychological distress before and during the COVID-19 pandemic: relationships with social media identity bubbles. *Soc Sci Med* 2022;293:114674. <https://doi.org/10.1016/j.socscimed.2021.114674>.
- S10. Megias-Robles A, Gutierrez-Cobo MJ, Cabello R, et al. A longitudinal study of the influence of concerns about contagion on negative affect during the COVID-19 lockdown in adults: the moderating effect of gender and resilience. *J Health Psychol* 2021;27:1165-1175. <https://doi.org/10.1177/1359105321990794>.
- S11. Pierce M, Hope H, Ford T, et al. Mental health before and during the COVID-19 pandemic: a longitudinal probability sample survey of the UK population. *Lancet Psychiatry* 2020;7:883-92. [https://doi.org/10.1016/S2215-0366\(20\)30308-4](https://doi.org/10.1016/S2215-0366(20)30308-4).
- S12. Daly M, Robinson E. Longitudinal changes in psychological distress in the UK from 2019 to September 2020 during the COVID-19 pandemic: evidence from a large nationally representative study. *Psychiatry Res* 2021;300:113920. <https://doi.org/10.1016/j.psychres.2021.113920>.
- S13. Shimura A, Yokoi K, Ishibashi Y, et al. Remote work decreases psychological and physical stress responses, but full-remote work increases presenteeism. *Front Psychol* 2021;12:730969. <https://doi.org/10.3389/fpsyg.2021.730969>.
- S14. Soltanzadeh A, Ghasemi M, Sadeghi-Yarandi M, et al. Psychological and psychosocial impact and related factors during the COVID-19 pandemic among Iranian oil refineries personnel: a longitudinal study. *Arch Iran Med* 2021;24:811-821. [doi:10.34172/aim.2021.121](https://doi.org/10.34172/aim.2021.121)
- S15. Thygesen LC, Moller SP, Ersboll AK, et al. Decreasing mental well-being during the COVID-19 pandemic: a longitudinal study among Danes before and during the pandemic. *J Psychiatr Res* 2021;144:151-157. <https://doi.org/10.1016/j.jpsychires.2021.09.035>.

- S16. van der Velden PG, Contino C, Das M, et al. Anxiety and depression symptoms, and lack of emotional support among the general population before and during the COVID-19 pandemic. a prospective national study on prevalence and risk factors. *J Affect Disord* 2020;277:540-548. <https://doi.org/10.1016/j.jad.2020.08.026>.
- S17. van der Velden, van Bakel H, Das M. Mental health problems among Dutch adolescents of the general population before and 9 months after the COVID-19 outbreaks: a longitudinal cohort study. *Psychiatry Res* 2022;311:114528. <https://doi.org/10.1016/j.psychres.2022.114528>.
- S18. Wanberg CR, Csillag B, Douglass RP, et al. Socioeconomic status and well-being during COVID-19: a resource-based examination. *J Appl Psychol* 2020;105:1382-1396. <http://dx.doi.org/10.1037/apl0000831>.
- S19. Bartlett L, Brady J, Farrow M, et al. Change in modifiable dementia risk factors during COVID-19 lockdown: the experience of over 50s in Tasmania, Australia. *Alzheimers Dement* 2021;7:e12169. <https://doi.org/10.1002/trc2.12169>.
- S20. Briggs R, McDowell CP, De Looze C, et al. Depressive symptoms among older adults pre- and post-COVID-19 pandemic. *J Am Med Dir Assoc* 2021;22:2251-2257. <https://doi.org/10.1016/j.jamda.2021.09.003>.
- S21. Creese B, Khan Z, Henley W, et al. Loneliness, physical activity and mental health during Covid-19: a longitudinal analysis of depression and anxiety in adults over the age of 50 between 2015 and 2020. *Int Psychogeriatr* 2021;33:505-514. <https://doi.org/10.1017/S1041610220004135>.
- S22. Eliassen EH, Weihe P, Petersen MS. The Faroese Septuagenarians cohort: a comparison of well-being before and during the COVID-19 pandemic among older home-dwelling Faroese. *Scand J Public Health* 2021;50:136-143. <https://doi.org/10.1177/14034948211056209>.

- S23. Herrera MS, Elgueta R, Fernandez MB, et al. A longitudinal study monitoring the quality of life in a national cohort of older adults in Chile before and during the COVID-19 outbreak. *BMC Geriatr* 2021;21:143. <https://doi.org/10.1186/s12877-021-02110-3>.
- S24. Kera T, Kawai H, Ejiri M, et al. Change in subjective health status among frail older Japanese people owing to the coronavirus disease pandemic and characteristics of their responses. *Geriatr Gerontol Int* 2021;21:1053-1059. <https://doi.org/10.1111/ggi.14276>.
- S25. Kivi M, Hansson I, Bjälkebring P. Up and about: older adults' well-being during the COVID-19 pandemic in a Swedish longitudinal study. *J Gerontol B Psychol Sci Soc Sci* 2021;76:e4-e9. <https://doi.org/10.1093/geronb/gbaa084>.
- S26. Lee E, Man R, Gan T, et al. The longitudinal psychological, physical activity, and financial impact of a COVID-19 lockdown on older adults in Singapore: the PIONEER-COVID population-based study. *Int J Geriatr Psychiatry* 2021;37:1-10. <https://doi.org/10.1002/gps.5645>.
- S27. Martinez M, Granados T, Fernandez-Fernandez V. Psychological impact of confinement in a sample of older adults: longitudinal study before and during COVID-19. *Accion Psicologica* 2021;18:151-164. <https://doi.org/10.5944/ap.18.1.29176>.
- S28. Okely JA, Corley J, Welstead M, et al. Change in physical activity, sleep quality, and psychosocial variables during COVID-19 lockdown: evidence from the Lothian Birth Cohort 1936. *Int J Environ Res Public Health* 2021;18:210. <https://doi.org/10.3390/ijerph18010210>.
- S29. Rentscher KE, Zhao X, Small BJ, et al. Loneliness and mental health during the COVID-19 pandemic in older breast cancer survivors and noncancer controls. *Cancer* 2021;127:3671-3679. doi:10.1002/cncr.33687.
- S30. Sardella A, Lenzo V, Bonanno GA, et al. Expressive flexibility and dispositional optimism contribute to the elderly's resilience and health-related quality of life during the COVID-

- 19 pandemic. *Int J Environ Res Public Health* 2021;18:1698.  
<https://doi.org/10.3390/ijerph18041698>.
- S31. Siew S, Mahendran R, Yu J. Directional effects of social isolation and quality of life on anxiety levels among community-dwelling older adults during a COVID-19 lockdown. *Am J Geriatr Psychiatry* 2021;29:1274-1279. <http://doi.org/10.1016/j.jagp.2021.03.012>.
- S32. van den Besselaar JH, MacNeil Vroomen JL, Buurman BM, et al. Symptoms of depression, anxiety, and perceived mastery in older adults before and during the COVID-19 pandemic: results from the Longitudinal Aging Study Amsterdam. *J Psychosom Res* 2021;151:110656. <https://doi.org/10.1016/j.jpsychores.2021.110656>.
- S33. van Tilburg TG, Steinmetz S, Stolte E, et al. Loneliness and mental health during the COVID-19 pandemic: a study among Dutch older adults. *J Gerontol B Psychol Sci Soc Sci* 2021;76:e249-e255. <https://doi.org/10.1093/geronb/gbaa111>.
- S34. Wang Y, Fu P, Li J, et al. Changes in psychological distress before and during the COVID-19 pandemic among older adults: the contribution of frailty transitions and multimorbidity. *Age Ageing* 2021;50:1011-1018. <https://doi.org/10.1093/ageing/afab061>.
- S35. Wong S, Zhang D, Sit R, et al. Impact of COVID-19 on loneliness, mental health, and health service utilisation: a prospective cohort study of older adults with multimorbidity in primary care. *Br J Gen Pract* 2020;70:e817-e824.  
<https://doi.org/10.3399/bjgp20X713021>.
- S36. Yu J, Mahendran R. COVID-19 lockdown has altered the dynamics between affective symptoms and social isolation among older adults: results from a longitudinal network analysis. *Sci Rep* 2021;11:14739. doi:10.1038/s41598-021-94301-6
- S37. Islam MI, Freeman J, Chadwick V, et al. Healthcare avoidance before and during the COVID-19 pandemic among Australian youth: a longitudinal study. *Healthcare* 2022;10:1261. <https://doi.org/10.3390/healthcare10071261>.

- S38. Marmet S, Wicki M, Gmel G, et al. The psychological impact of the COVID-19 crisis on young Swiss men participating in a cohort study. *Swiss Med Wkly* 2021;151:w30028. <https://doi.org/10.4414/smw.2021.w30028>.
- S39. Rimfeld K, Malancini M, Allegrini A, et al. Genetic correlates of psychological responses to the COVID-19 crisis in young adult twins in Great Britain. *Behav Genet* 2021;51:110-124. <https://doi.org/10.1007/s10519-021-10050-2>.
- S40. Romm KF, Patterson B, Wysota CN, et al. Predictors of negative psychosocial and health behavior impact of COVID-19 among young adults. *Health Educ Res* 2022;36:385-397. <https://doi.org/10.1093/her/cyab026>.
- S41. Tanioka K, Kayaba M, Tomishima S, et al. Changes in sleep behavior, sleep problems, and psychological distress/health-related quality of life of young Japanese individuals before and during the COVID-19 pandemic. *Chronobiol Int* 2022;39:781-791. <https://doi.org/10.1080/07420528.2022.2034839>.
- S42. Villadsen A, Patalay P, Bann D. Mental health in relation to changes in sleep, exercise, alcohol and diet during the COVID-19 pandemic: examination of five UK cohort studies. *Psychol Med* 2021:1-10. <https://doi.org/10.1017/S0033291721004657>.
- S43. Watkins-Martin K, Orri M, Pennestri MH, et al. Depression and anxiety symptoms in young adults before and during the Covid-19 pandemic: evidence from a Canadian population-based cohort. *Ann Gen Psychiatry* 2021;20:42. <https://doi.org/10.1186/s12991-021-00362-2>.
- S44. da Conceicao V, Rothes I, Gusmao R, et al. Depression and anxiety before and during the COVID-19 lockdown: a longitudinal cohort study with university students. *MedRxiv* 20210224 [Preprint]. <https://doi.org/10.1101/2021.02.23.21252284>.

- S45. Dong X. 新型冠状病毒肺炎疫情对师范类大学生心理健康的影响研究 [Influence study of COVID-2019 on mental health of normal college students]. *Psychologies* 2020;15:37-39. <https://www.doi.org/10.19738/j.cnki.psy.2020.20.013>.
- S46. Elmer T, Mepham K, Stadtfeld C. Students under lockdown: comparison of students' social networks and mental health before and during the COVID-19 crisis in Switzerland. *PLoS One* 2020;15:e0236337. <https://doi.org/10.1371/journal.pone.0236337>.
- S47. Evans S, Alkan E, Bhangoo JK, et al. Effects of the COVID-19 lockdown on mental health, wellbeing, sleep, and alcohol use in a UK student sample. *Psychiatry Res* 2021;298:113819. <https://doi.org/10.1016/j.psychres.2021.113819>.
- S48. Fuller-Rowell TE, Nichols OI, Doan SN, et al. Changes in depressive symptoms, physical symptoms, and sleep-wake problems from before to during the COVID-19 pandemic among emerging adults: inequalities by gender, socioeconomic position, and race. *Emerg Adulthood* 2021;9:492-505. <https://doi.org/10.1177/21676968211042111>.
- S49. Gelezelyte O, Kazlauskas E, Brailovskaia J, et al. Suicidal ideation in university students in Lithuania amid the COVID-19 pandemic: a prospective study with pre-pandemic measures. *Death Stud* 2022;46:2395-2403. <https://doi.org/10.1080/07481187.2021.1947417>.
- S50. Gopalan M, Linden-Carmichael A, Lanza S. College students' sense of belonging and mental health amidst the COVID-19 pandemic. *J Adolesc Health* 2022;70:228-233. <https://doi.org/10.1016/j.jadohealth.2021.10.010>.
- S51. Hamza CA, Ewing L, Heath NL, et al. When social isolation is nothing new: a longitudinal study psychological distress during COVID-19 among university students with and without preexisting mental health concerns. *Can Psychol* 2021;62:20-30. <https://doi.org/10.1037/cap0000255>.

- S52. He L, Wei D, Yang F, et al. Functional connectome prediction of anxiety related to the COVID-19 pandemic. *Am J Psychiatry* 2021;178:530-540.  
doi:10.1176/appi.ajp.2020.20070979.
- S53. Koelen J, Mansueto A, Finnemann A, et al. COVID-19 and mental health among at-risk university students: a prospective study into risk and protective factors. *Int J Methods Psychiatr Res* 2021;31:e1901. <https://doi.org/10.1002/mpr.1901>.
- S54. Li H, Cao H, Leung D, et al. The psychological impacts of a COVID-19 outbreak on college students in China: a longitudinal study. *Int J Environ Res Public Health* 2020;17:3933. doi:10.3390/ijerph17113933.
- S55. Li R, Dai J, Yuan X, et al. 新冠肺炎疫情期大学生心理健康状况 [Mental health status of college students during the COVID-19 epidemic]. *Journal of Panzhihua University* 2020;37:18-24. doi:10.13773/j.cnki.51-1637/z.2020.06.004.
- S56. Li WW, Yu H, Miller DJ, et al. Novelty seeking and mental health in Chinese university students before, during, and after the COVID-19 pandemic lockdown: a longitudinal study. *Front Psychol* 2020;11:600739. <https://doi.org/10.3389/fpsyg.2020.600739>
- S57. Liu D, Li B, Hao F, et al. The prevalence and incidence of major depressive disorder in 8079 Chinese university freshmen before and during COVID-19. *J Affect Disord* 2022;307:62-68. <https://doi.org/10.1016/j.jad.2022.03.022>.
- S58. Lu P, Yang L, Wang C, et al. Mental health of new undergraduate students before and after COVID-19 in China. *Sci Rep* 2021;11:18783. <https://doi.org/10.1038/s41598-021-98140-3>.
- S59. Mauer VA, Littleton H, Lim S, et al. Fear of COVID-19, anxiety, and social support among college students. *J Am Coll Health* 2022;1-8.  
<https://doi.org/10.1080/07448481.2022.2053689>

- S60. Mehus C, Lyden G, Bonar E, et al. Association between COVID-19-related loneliness or worry and symptoms of anxiety and depression among first-year college students. *J Am Coll Health* 2021;1-6. <https://doi.org/10.1080/07448481.2021.1942009>.
- S61. Ratner K, Burrow A, Mendle J, et al. A prospective study of college student depressive symptoms, sense of purpose, and response to a COVID-19 campus shutdown. *Pers Individ Dif* 2022;189:111475. <https://doi.org/10.1016/j.paid.2021.111475>.
- S62. Saraswathi I, Saikarthik J, Kumar KS, et al. Impact of COVID-19 outbreak on the mental health status of undergraduate medical students in a COVID-19 treating medical college: a prospective longitudinal study. *PeerJ* 2020;8:e10164. doi:10.7717/peerj.10164
- S63. Savage MJ, James R, Magistro D, et al. Mental health and movement behaviour during the COVID-19 pandemic in UK university students: prospective cohort study. *Ment Health Phys Act* 2020;19:100357. <https://doi.org/10.1016/j.mhpa.2020.100357>.
- S64. Savage MJ, Hennis PJ, Magistro D, et al. Nine months into the COVID-19 pandemic: a longitudinal study showing mental health and movement behaviours are impaired in UK students. *Int J Environ Res Public Health* 2021;18:2930. <https://doi.org/10.3390/ijerph18062930>.
- S65. Shiratori Y, Ogawa T, Ota M, et al. A longitudinal comparison of college student mental health under the COVID-19 self-restraint policy in Japan. *J Affect Disord Rep* 2022;8:100314. <https://doi.org/10.1016/j.jadr.2022.100314>.
- S66. Truskauskaite-Kuneviciene I, Brailovskaia J, Margraf J, et al. Evidence on resilient initial response to COVID-19 pandemic among youth: findings from the prospective study of mental health in two European countries. *Emerg Adulthood* 2021;9:566-575. <https://doi.org/10.1177/21676968211031120>.
- S67. Voltmer E, Koslich-Strumann S, Walther A, et al. The impact of the COVID-19 pandemic on stress, mental health and coping behavior in German university students - a

- longitudinal study before and after the onset of the pandemic. *BMC Public Health* 2021;21:1385. <https://doi.org/10.1186/s12889-021-11295-6>.
- S68. Wang Y, Xie C, Zhang X. 常态化疫情防控期间医学院校学生心理健康状况对比分析. *China Journal of Multimedia & Network Teaching* 2021;4:104-106.
- S69. Yang X, Hu H, Zhao C, et al. A longitudinal study of changes in smart phone addiction and depressive symptoms and potential risk factors among Chinese college students. *BMC Psychiatry* 2021;21:252. <https://doi.org/10.1186/s12888-021-03265-4>.
- S70. Yang Z, Luo Y, Zhou Q, et al. COVID-19-related stressors and depression in Chinese adolescents: the effects of life history strategies and gender. *J Affect Disord* 2022;304:122-127. <https://doi.org/10.1016/j.jad.2022.02.060>.
- S71. Zimmermann M, Bledsoe C, Papa A. Initial impact of the COVID-19 pandemic on college student mental health: a longitudinal examination of risk and protective factors. *Psychiatry Res* 2021;305:114254. <https://doi.org/10.1016/j.psychres.2021.114254>.
- S72. Achterberg M, Dobbelaar S, Boer OD, et al. Perceived stress as mediator for longitudinal effects of the COVID-19 lockdown on wellbeing of parents and children. *Sci Rep* 2021;11:2971. doi:10.1038/s41598-021-81720-8.
- S73. Adachi M, Takahashi M, Shinkawa H, et al. Longitudinal association between smartphone ownership and depression among schoolchildren under COVID-19 pandemic. *Soc Psychiatry Psychiatr Epidemiol* 2022;57:239-243. <https://doi.org/10.1007/s00127-021-02196-5>.
- S74. Bado P, Hoffmann MS, Pan P, et al. Mental health problems predict inequalities in accessing online classes during COVID-19 pandemic in youth. *PsyArXiv* 20220617 [Preprint]. <https://psyarxiv.com/knq49/>

- S75. Bernasco EL, Nelemans SA, van der Graaff J, et al. Friend support and internalizing symptoms in early adolescence during COVID-19. *J Res Adolesc* 2021;31:692-702. <https://doi.org/10.1111/jora.12662>.
- S76. Bosch R, Pagerols M, Prat R, et al. Changes in the mental health of children and adolescents during the COVID-19 lockdown: associated factors and life conditions. *Int J Environ Res Public Health* 2022;19:4120. <https://doi.org/10.3390/ijerph19074120>.
- S77. Charmaraman L, Lynch AD, Richer AM, et al. Examining early adolescent positive and negative social technology behaviors and well-being during the COVID-19 pandemic. *Technol Mind Behav* 2022;3. <https://doi.org/10.1037/tmb0000062>.
- S78. Chen I, Chen C, Pakpour AH, et al. Problematic internet-related behaviors mediate the associations between levels of internet engagement and distress among schoolchildren during COVID-19 lockdown: a longitudinal structural equation modeling study. *J Behav Addict* 2021;10:135-148. <https://doi.org/10.1556/2006.2021.00006>.
- S79. Chen C, Chen I, Hou W, et al. The relationship between children's problematic internet-related behaviors and psychological distress during the onset of the COVID-19 pandemic: a longitudinal Study. *J Addict Med* 2022;16:e73-e80. [doi:10.1097/ADM.0000000000000845](https://doi.org/10.1097/ADM.0000000000000845).
- S80. Daniunaite I, Truskauskaite-Kuneviciene I, Thoresen S, et al. Adolescents amid the COVID-19 pandemic: a prospective study of psychological functioning. *Child Adolesc Psychiatry Ment Health* 2021;15:45. <https://doi.org/10.1186/s13034-021-00397-z>.
- S81. Ezpeleta L, Navarro JB, de la Osa N, et al. Life conditions during COVID-19 lockdown and mental health in Spanish adolescents. *Int J Environ Res Public Health* 2020;17:7327. [doi:10.3390/ijerph17197327](https://doi.org/10.3390/ijerph17197327).
- S82. Fujihara S, Tabuchi T. The impact of COVID-19 on the psychological distress of youths in Japan: a latent growth curve analysis. *J Affect Disord* 2022;305:19-27. <https://doi.org/10.1016/j.jad.2022.02.055>.

- S83. Hu Y, Qian Y. COVID-19 and adolescent mental health in the United Kingdom. *J Adolesc Health* 2021;69:26-32. <https://doi.org/10.1016/j.jadohealth.2021.04.005>.
- S84. Knowles G, Gayer-Anderson C, Turner A, et al. Covid-19, social restrictions, and mental distress among young people: a UK longitudinal, population-based study. *J Child Psychol Psychiatry* 2022. <https://doi.org/10.1111/jcpp.13586>.
- S85. Li Y, Zhou Y, Ru T, et al. How does the COVID-19 affect mental health and sleep among Chinese adolescents: a longitudinal follow-up study. *Sleep Med* 2021;85:246-258. <https://doi.org/10.1016/j.sleep.2021.07.008>.
- S86. Liao S, Luo B, Liu H, et al. Bilateral associations between sleep duration and depressive symptoms among Chinese adolescents before and during the COVID-19 pandemic. *Sleep Med* 2021;84:289-293. <https://doi.org/10.1016/j.sleep.2021.06.007>.
- S87. Magson NR, Freeman J, Rapee RM, et al. Risk and protective factors for prospective changes in adolescent mental health during the COVID-19 pandemic. *J Youth Adolesc* 2021;50:44-57. <https://doi.org/10.1007/s10964-020-01332-9>.
- S88. Mastorci F, Bastiani L, Trivellini G, et al. Well-being perception during COVID-19 pandemic in healthy adolescents: from the Avatar Study. *Int J Environ Res Public Health* 2021;18:6388. <https://doi.org/10.3390/ijerph18126388>.
- S89. Meireles A, Marques S, Peixoto MM, et al. Portuguese adolescents' cognitive well-being and basic psychological needs during the COVID-19 outbreak: a longitudinal study. *Appl Psychol Health Well Being* 2022;14:881-898. <https://doi.org/10.1111/aphw.12356>.
- S90. Naumann E, von den Driesch E, Schumann A, et al. Increase of depressive symptoms among adolescents during the first COVID-19 lockdown in Germany results from the German family panel pairfam. *Bundesgesundheitsblatt Gesundheitsforschung Gesundheitsschutz* 2021;64:1533-1540. <https://doi.org/10.1007/s00103-021-03451-5>.

- S91. Paizan M, Benbow A, Aumann L, et al. Home-learning during COVID-19: the psychological adjustment of minority and majority adolescents. *Sch Psychol* 2022;37:75-84. <https://doi.org/10.1037/spq0000489>.
- S92. Polack RG, Sened H, Aube S. Connections during crisis: adolescents' social dynamics and mental health during COVID-19. *Dev Psychol* 2021;57:1633-1647. doi:10.1037/dev0001211.
- S93. Rau LM, Grothus S, Sommer A, et al. Chronic pain in schoolchildren and its association with psychological wellbeing before and during the COVID-19 pandemic. *J Adolesc Health* 2021;69:721-728. <https://doi.org/10.1016/j.jadohealth.2021.07.027>.
- S94. Shoshani A, Kor A. The mental health effects of the COVID-19 pandemic on children and adolescents: risk and protective factors. *Psychol Trauma* 2021. <https://doi.org/10.1037/tra0001188>.
- S95. Teng Z, Pontes HM, Nie Q, et al. Depression and anxiety symptoms associated with internet gaming disorder before and during the COVID-19 pandemic: a longitudinal study. *J Behav Addict* 2021;10:169-180. <https://doi.org/10.1556/2006.2021.00016>.
- S96. Vira E, Skoog T. Swedish middle school students' psychosocial well-being during the COVID-19 pandemic: a longitudinal study. *SSM Popul Health* 2021;16:100942. <https://doi.org/10.1016/j.ssmph.2021.100942>.
- S97. Wang W, Guo Y, Du X, et al. Associations between poor sleep quality, anxiety symptoms, and depressive symptoms among Chinese adolescents before and during COVID-19: a longitudinal study. *Front Psychiatry* 2022;12:786640. <https://doi.org/10.3389/fpsy.2021.786640>.
- S98. Widnall E, Winstone L, Plackett R. Impact of school and peer connectedness on adolescent mental health and well-being outcomes during the COVID-19 pandemic: a longitudinal panel survey. *Int J Environ Res Public Health* 2022;19:6768. <https://doi.org/10.3390/ijerph19116768>.

- S99. Wong RS, Tung K, Li X, et al. Examining family pre-pandemic influences on adolescent psychosocial wellbeing during the COVID-19 pandemic. *Curr Psychol* 2022. <https://doi.org/10.1007/s12144-022-02736-5>.
- S100. Yang Z, Luo Y, Zhou Q, et al. COVID-19-related stressors and depression in Chinese adolescents: the effects of life history strategies and gender. *J Affect Disord* 2022;304:122-127. <https://doi.org/10.1016/j.jad.2022.02.060>.
- S101. Zhang L, Zhang D, Fang J, et al. Assessment of mental health of Chinese primary school students before and after school closing and opening during the COVID-19 pandemic. *JAMA Netw Open* 2020;3:e2021482. [doi:10.1001/jamanetworkopen.2020.21482](https://doi.org/10.1001/jamanetworkopen.2020.21482).
- S102. Adesogan O, Lavner JA, Carter SE, et al. COVID-19 stress and the health of black Americans in the rural south. *Clin Psychol Sci* 2021;1-18. <https://doi.org/10.1177/21677026211049379>.
- S103. Frank E, Zhao Z, Fang Y, et al. Experiences of work-family conflict and mental health symptoms by gender among physician parents during the COVID-19 pandemic. *JAMA Netw Open* 2021;4:e2134315. [doi:10.1001/jamanetworkopen.2021.34315](https://doi.org/10.1001/jamanetworkopen.2021.34315).
- S104. Gagne ME, Piche G, Clement ME, et al. Families in confinement: a pre-post COVID-19 study. *Couple Family Psychol* 2021;10:260-270. <https://doi.org/10.1037/cfp0000179>.
- S105. Loret de Mola C, Blumenberg C, Martins RC, et al. Increased depression and anxiety during the COVID-19 pandemic in Brazilian mothers: a longitudinal study. *Braz J Psychiatry* 2021;43:337-338. [doi:10.1590/1516-4446-2020-1628](https://doi.org/10.1590/1516-4446-2020-1628).
- S106. Pitchik HO, Tofail F, Akter F, et al. Effects of the COVID-19 pandemic on caregiver mental health and the child caregiving environment in a low-resource, rural context. *Child Dev* 2021;92:e764-e780. <https://doi.org/10.1111/cdev.13651>.

- S107. Rivera N, McGuinn L, Osorio-Valencia E, et al. Changes in depressive symptoms, stress and social support in Mexican women during the COVID-19 pandemic. *Int J Environ Res Public Health* 2021;18:8775. <https://doi.org/10.3390/ijerph18168775>.
- S108. Thompson SF, Shimomaeda L, Calhoun R, et al. Maternal mental health and child adjustment problems in response to the COVID-19 pandemic in families experiencing economic disadvantage. *Res Child Adolesc Psychopathol* 2022;50:695-708. <https://doi.org/10.1007/s10802-021-00888-9>.
- S109. Becker H, Stuifbergen AK, Lim S, et al. Health promotion, functional abilities, and quality of life before and during COVID-19 in people with multiple sclerosis. *Nurs Res* 2022;71:84-89. doi:10.1097/NNR.0000000000000573.
- S110. Bonenkamp AA, Druiventak TA, van der Sluijs A, et al. The impact of COVID-19 on the mental health of dialysis patients. *J Nephrol* 2021;34:337-344. <https://doi.org/10.1007/s40620-021-01005-1>.
- S111. Chao AM, Wadden TA, Clark JM, et al. Changes in the prevalence of symptoms of depression, loneliness, and insomnia in U.S. older adults with Type 2 Diabetes during the COVID-19 pandemic: the Look AHEAD Study. *Diabetes Care* 2022;45:74-82. doi:10.2337/dc21-1179.
- S112. Chiu CY, Wilcher K, Jones A. Perceived COVID-19 impacts on stress, resilience, and mental health among people with multiple sclerosis: a longitudinal prospective study. *J Rehabil* 2021;87:80-87.
- S113. Derksen J, May AM, van de Poll-Franse L, et al. Colorectal cancer care and patients' perceptions before and during COVID-19: implications for subsequent SARS-CoV-2 infection waves. *JNCI Cancer Spectr* 2021;5:pkab047. <https://doi.org/10.1093/jncics/pkab047>.

- S114. Dunlop-Thomas C, Bao G, Lim SS, et al. Psychosocial and health measures in systemic lupus erythematosus: before and during the COVID-19 pandemic in the Georgian's organized against lupus cohort. *Arthritis Rheumatol* 2021;73:542-545.
- S115. Fujiwara A, Watanabe K, Ida M, et al. The short-term effect of COVID-19 pandemic on disability, pain intensity, psychological status, and exercise habits in patients with chronic pain. *J Anesth* 2021;35:862-869. <https://doi.org/10.1007/s00540-021-02992-y>.
- S116. Garcia-Rudolph A, Sauri J, Carballo JL, et al. The impact of COVID-19 on community integration, quality of life, depression and anxiety in people with chronic spinal cord injury. *J Spinal Cord Med* 2021;45:681-690.  
<https://doi.org/10.1080/10790268.2021.1922230>.
- S117. Gul ZB. Depression and sexual functions in epilepsy patients: comparison before and during the COVID-19 pandemic. *Ann Med Psychol* 2022;180:127-132.  
<https://doi.org/10.1016/j.amp.2021.02.006>.
- S118. Henry RS, Kwakkenbos L, Carrier ME, et al. Mental health before and during the pandemic in people with systemic sclerosis. *Lancet Rheumatol* 2022;4(2):e82-e85.  
[https://doi.org/10.1016/S2665-9913\(21\)00363-5](https://doi.org/10.1016/S2665-9913(21)00363-5).
- S119. Johnstone G, Treharne GJ, Fletcher BD, et al. Mental health and quality of life for people with rheumatoid arthritis or ankylosing spondylitis in Aotearoa New Zealand following the COVID-19 national lockdown. *Rheumatol Int* 2021;41:1763-1772.  
<https://doi.org/10.1007/s00296-021-04952-x>.
- S120. Katz P, Pedro S, Wipfler K, et al. Changes in mental health during the COVID-19 pandemic among individuals with rheumatic disease [abstract]. *Arthritis Rheumatol* 2020;72(Suppl 10).
- S121. Liang J, Li X, Zhang W, et al. 新冠肺炎流行期住院集中医学观察期间血液透析患者的焦虑抑郁状况 [Anxiety and depression in patients with maintenance hemodialysis under

- concentrated medical observation in hospital during the COVID-19 epidemic]. *Chinese Mental Health Journal* 2020;12:1050-1055. doi:10.3969/j.issn.1000-6729.2020.12.014.
- S122. Lim SS, Theis K, Dunlop-Thomas C, et al. Unexpected changes in physical and psychological measures among Georgia lupus patients during the early weeks of the COVID-19 pandemic in the United States, March 30-April 21, 2020 [abstract]. *Arthritis Rheumatol* 2020;72(Suppl 10).
- S123. Moller SP, Apputhurai P, Tye-Din JA, et al. Longitudinal assessment of the common sense model before and during the COVID-19 pandemic: a large coeliac disease cohort study. *J Psychosom Res* 2022;153:110711.  
<https://doi.org/10.1017/j.jpsychores.2021.110711>.
- S124. Park DH, Fuge J, Meltendorf T, et al. Impact of Sars-CoV-2-Pandemic on mental disorders and quality of life in patients with pulmonary arterial hypertension. *Eur Respir J* 2021;58:PA3588. doi:10.1183/13993003.congress-2021.PA3588.
- S125. Sacre JW, Holmes-Truscott E, Salim A, et al. Impact of the COVID-19 pandemic and lockdown restrictions on psychosocial and behavioural outcomes among Australian adults with type 2 diabetes: findings from the PREDICT cohort study. *Diabet Med* 2021;38:e14611. <https://doi.org/10.1111/dme.14611>.
- S126. Sbragia E, Colombo E, Pollio C, et al. Embracing resilience in multiple sclerosis: a new perspective from COVID-19 pandemic. *Psychol Health Med* 2022;27:352-360.  
<https://doi.org/10.1080/13548506.2021.1916964>.
- S127. Ubara A, Sumi Y, Ito K, et al. Self-isolation due to COVID-19 is linked to small one-year changes in depression, sleepiness, and insomnia: results from a clinic for sleep disorders in Shiga Prefecture, Japan. *Int J Environ Res Public Health* 2020;17:8971.  
<https://doi.org/10.3390/ijerph17238971>.

- S128. Uchida J, Yoshikoshi S, Nakajima T, et al. Impact of the COVID-19 pandemic on depressive symptoms in Japanese patients undergoing hemodialysis. *J Nephrol* 2022;35:371-373. <https://doi.org/10.1007/s40620-021-01218-4>.
- S129. Gentile A, Torales J, O'Higgins M, et al. Phone-based outpatients' follow-up in mental health centers during the COVID-19 quarantine. *Int J Soc Psychiatry* 2022;68:129-133. <https://doi.org/10.1177/0020764020979732>.
- S130. Huong P, Wu CY, Lee MB, et al. The influence of research follow-up during COVID-19 pandemic on mental distress and resilience: a multicenter cohort study of treatment-resistant depression. *Int J Environ Res Public Health* 2022;19:3738. <https://doi.org/10.3390/ijerph19063738>.
- S131. Swerdlow BA, Johnson SL, Timpano KR, et al. Longitudinal associations between internalizing symptoms, social behavior, and social perceptions in the initial months of the COVID-19 pandemic: findings from a transdiagnostic community sample. *J Affect Disord* 2021;294:805-812. <https://doi.org/10.1016/j.jad.2021.07.093>.
- S132. Young KS, Purves KL, Hubel C, et al. Depression, anxiety and PTSD symptoms before and during the COVID-19 pandemic in the UK. *Psychol Med* 2022:1-14. <https://doi.org/10.1017/S0033291722002501>.
- S133. Li W, Frank E, Zhao Z, et al. Mental health of young physicians in China during the Novel Coronavirus Disease 2019 outbreak. *JAMA Netw Open* 2020;3:e2010705. doi:10.1001/jamanetworkopen.2020.10705.
- S134. Bavinton BR, Chan C, Hammoud MA, et al. Increase in depression and anxiety among Australia gay and bisexual men during COVID-19 restrictions: findings from a prospective online cohort study. *Arch Sex Behav* 2022;51:355-364. doi:10.1007/s10508-021-02276-2.

- S135. Flentje A, Obedin-Maliver J, Lubensky ME, et al. Depression and anxiety changes among sexual and gender minority people coinciding with onset of COVID-19 pandemic. *J Gen Intern Med* 2020;35:2788-2790. <https://doi.org/10.1007/s11606-020-05970-4>.
- S136. Ghabrial MA, Scheim AI, Chih C, et al. Change in finances, peer access, and mental health among trans and non-binary people in Canada during COVID-19. *MedRxiv* 20211214 [Preprint]. <https://doi.org/10.1101/2021.12.13.21267077>.
- S137. Gosselin A, Melchior M, Carillon S, et al. Deterioration of mental health and insufficient Covid-19 information among disadvantaged immigrants in the greater Paris area. *J Psychosom Res* 2021;146:110504. <https://doi.org/10.1016/j.jpsychores.2021.110504>.
